# Supplementary material for: Localized ablative immunotherapy drives de novo CD8+ T-cell responses to poorly immunogenic tumors
Source: HighWire-hosted journal article supplement (doi:10.1136/jitc-2022-004973), 2022-10-01
Supplement: jitc-2022-004973supp002_data_supplement.xlsx [file jitc-2022-004973supp002_data_supplement.xlsx]

## Sheet: All B16F10 Db Peptides
Supplementary Table 1. List of all 7-14 aa non-redundant peptides identified at 1% FDR, following immunoaffinity purification of H2-Db peptide complexes from B16-F10 tumors. Source, peptide sequence, length, accession and the number of times each peptide was detected in the experiments are shown.
Source	Peptide	Length	Acession	Experiment 1	Experiment 2	Total
B16-F10	AAAAAAAATT	10	A6H694|LRC63_MOUSE	1		1
B16-F10	AAAKNLSDMTL	11	Q8K1H7|T11L2_MOUSE		1	1
B16-F10	AAAKVALTKRAD	12	Q9QXX4|CMC2_MOUSE	1	1	2
B16-F10	AAARGLTLL	9	O89023|TPP1_MOUSE	1	1	2
B16-F10	AAATNLSFL	9	Q61371|IFT88_MOUSE		1	1
B16-F10	AAEDVVATGAD	11	O55022|PGRC1_MOUSE	1		1
B16-F10	AAGINRDSL	9	Q91VT4|CBR4_MOUSE		1	1
B16-F10	AAGINVEII	9	Q0GNC1|INF2_MOUSE	1	1	2
B16-F10	AAGVGDMVM	9	P62830|RL23_MOUSE		1	1
B16-F10	AAIANSMNYL	10	Q6P5E4|UGGG1_MOUSE	1		1
B16-F10	AAIEAMNGQYL	11	Q8QZY9|SF3B4_MOUSE	1	1	2
B16-F10	AAIENIEHL	9	Q6PB66|LPPRC_MOUSE		1	1
B16-F10	AAIIDHERI	9	Q3UU96-2|MRCKA_MOUSE:Q3UU96|MRCKA_MOUSE		1	1
B16-F10	AAIKLQELL	9	Q99PL5|RRBP1_MOUSE		1	1
B16-F10	AAILNNAHYL	10	Q9WTS4|TEN1_MOUSE	1	1	2
B16-F10	AAINNRLEL	9	Q9CWU2|ZDH13_MOUSE		1	1
B16-F10	AAIRNYGIEL	10	Q9WU20|MTHR_MOUSE	1	1	2
B16-F10	AAITNKYQL	9	B2RS91|RRN3_MOUSE	1	1	2
B16-F10	AAIVDGDRI	9	Q7TT50|MRCKB_MOUSE	1	1	2
B16-F10	AAKVALTKRAD	11	Q9QXX4|CMC2_MOUSE		1	1
B16-F10	AALANATVI	9	Q9Z2U2-2|ZN292_MOUSE:Q9Z2U2|ZN292_MOUSE		1	1
B16-F10	AALANITFF	9	Q3HNM7|INSC_MOUSE	1	1	2
B16-F10	AALANLDNI	9	Q8K2K6|AGFG1_MOUSE	1	1	2
B16-F10	AALENDKTI	9	Q9D7H2|WDR5B_MOUSE:P61965|WDR5_MOUSE	1	1	2
B16-F10	AALENGYTL	9	O70343|PRGC1_MOUSE	1	1	2
B16-F10	AALENPMLL	9	Q9D906|ATG7_MOUSE	1	1	2
B16-F10	AALENRQTI	9	Q9WU42-2|NCOR2_MOUSE:Q9WU42|NCOR2_MOUSE		1	1
B16-F10	AALENTHLL	9	Q9D187|MIP18_MOUSE	1	1	2
B16-F10	AALINVGFL	9	Q8R087|B4GT7_MOUSE		1	1
B16-F10	AALIQQATTV	10	P51410|RL9_MOUSE		1	1
B16-F10	AALKNAFSL	9	Q6PNC0|DMXL1_MOUSE:Q8BPN8|DMXL2_MOUSE	1	1	2
B16-F10	AALKNAFSLL	10	Q6PNC0|DMXL1_MOUSE		1	1
B16-F10	AALKNLPLI	9	Q9CZW4|ACSL3_MOUSE		1	1
B16-F10	AALLNFDEF	9	Q6P9Q4|FHOD1_MOUSE	1	1	2
B16-F10	AALLNQQFL	9	P48453|PP2BB_MOUSE:P48455|PP2BC_MOUSE	1	1	2
B16-F10	AALLNTDLV	9	Q91WM3|U3IP2_MOUSE	1	1	2
B16-F10	AALMNQQFL	9	P63328|PP2BA_MOUSE	1		1
B16-F10	AALNNHVEV	9	Q80SY4|MIB1_MOUSE	1		1
B16-F10	AALPNIYEL	9	P49718|MCM5_MOUSE	1	1	2
B16-F10	AALQAANEEL	10	Q5DTN8|JKIP3_MOUSE	1		1
B16-F10	AALQNAVAF	9	Q80VI1|TRI56_MOUSE	1	1	2
B16-F10	AALQNLEQL	9	Q9WTK5|NFKB2_MOUSE	1	1	2
B16-F10	AALQNLVKI	9	P70168|IMB1_MOUSE	1	1	2
B16-F10	AALQNYNNEL	10	Q9JJ94|SSNA1_MOUSE		1	1
B16-F10	AALRLLTYL	9	Q8BQ33|TICRR_MOUSE		1	1
B16-F10	AALTLLEKM	9	Q8R313|EXOC6_MOUSE		1	1
B16-F10	AALVNLDSL	9	Q8CHU3|EPN2_MOUSE	1	1	2
B16-F10	AALVNPDSF	9	P70121|ZHX1_MOUSE	1		1
B16-F10	AALVSRTFL	9	P48410|ABCD1_MOUSE	1	1	2
B16-F10	AAMADTFLEHM	11	P52480|KPYM_MOUSE	1		1
B16-F10	AAMKNVTEL	9	P61982|1433G_MOUSE	1	1	2
B16-F10	AAMLLQQVM	9	Q8CCJ3|UFL1_MOUSE	1	1	2
B16-F10	AAMLNYTHI	9	Q8VDB2|ALG12_MOUSE	1	1	2
B16-F10	AAMVSKFFL	9	Q91WB2|PLPP7_MOUSE		1	1
B16-F10	AANINKESI	9	Q922B2|SYDC_MOUSE	1		1
B16-F10	AAPANPEMDNL	11	O08734|BAK_MOUSE		1	1
B16-F10	AAPAPSLWTL	10	Q9D7I0|SHSA5_MOUSE	1	1	2
B16-F10	AAPFDTVHI	9	Q8BNV1|TRM2A_MOUSE	1	1	2
B16-F10	AAPGNKTSYI	10	Q8K4F6|NSUN5_MOUSE	1		1
B16-F10	AAPINPSDI	9	Q9DCS3|MECR_MOUSE		1	1
B16-F10	AAPINTQGL	9	Q8BIH0|SP130_MOUSE	1	1	2
B16-F10	AAPISPWTM	9	Q3U133|ZN746_MOUSE	1	1	2
B16-F10	AAPKSAETL	9	Q80V53|CHSTE_MOUSE	1	1	2
B16-F10	AAPPPGIVEI	10	E9Q7E2|ARID2_MOUSE	1	1	2
B16-F10	AAPQNFTPSMI	11	Q9Z1T1|AP3B1_MOUSE	1	1	2
B16-F10	AAPRNSPTGL	10	Q8CGI1|F193A_MOUSE	1	1	2
B16-F10	AAPRPPPKPM	10	P62855|RS26_MOUSE	1	1	2
B16-F10	AAPRSFIFL	9	Q3UIK4|MET14_MOUSE	1	1	2
B16-F10	AAPSAPSAGSL	11	Q8CI61|BAG4_MOUSE	1		1
B16-F10	AAPSNLPYL	9	Q8BFV3|DUS4_MOUSE	1	1	2
B16-F10	AAPTNANSL	9	Q8BT14|CNOT4_MOUSE	1	1	2
B16-F10	AAPTNANSLNSTF	13	Q8BT14-2|CNOT4_MOUSE:Q8BT14|CNOT4_MOUSE:Q8BT14-3|CNOT4_MOUSE		1	1
B16-F10	AAPTNRQIEIL	11	Q9Z0W3|NU160_MOUSE		1	1
B16-F10	AAPTNRQIEILEL	13	Q9Z0W3|NU160_MOUSE	1	1	2
B16-F10	AAPVSATVL	9	P41216|ACSL1_MOUSE		1	1
B16-F10	AAPVSGPRL	9	Q6NSQ7|LTV1_MOUSE	1		1
B16-F10	AAQTNLTLL	9	O70477|PKNX1_MOUSE:Q8BG99|PKNX2_MOUSE	1		1
B16-F10	AAVANQHSSFV	11	Q6P9P6|KIF11_MOUSE	1	1	2
B16-F10	AAVENLPTFL	10	P70168|IMB1_MOUSE	1	1	2
B16-F10	AAVENVSEL	9	E9Q6J5|BD1L1_MOUSE	1	1	2
B16-F10	AAVGNHVAKL	10	Q8VBW6|ULA1_MOUSE		1	1
B16-F10	AAVIAHDFL	9	P30282|CCND3_MOUSE	1	1	2
B16-F10	AAVIDEDVL	9	Q9D787|PPIL2_MOUSE	1	1	2
B16-F10	AAVIDQERL	9	Q80UW5|MRCKG_MOUSE	1	1	2
B16-F10	AAVINKTVV	9	Q8BKT3|GCFC2_MOUSE		1	1
B16-F10	AAVINPPQACI	11	Q8BKZ9|ODPX_MOUSE		1	1
B16-F10	AAVKNEVNV	9	E9Q8I9|FRY_MOUSE	1	1	2
B16-F10	AAVLNPRFL	9	Q7TPS5|C2CD5_MOUSE	1	1	2
B16-F10	AAVQLIWVV	9	Q8CIM8|INT4_MOUSE:Q8CIM8-2|INT4_MOUSE		1	1
B16-F10	AAVQNPALTAL	11	Q3U1N2|SRBP2_MOUSE	1	1	2
B16-F10	AAVSNFGYDL	10	P97298|PEDF_MOUSE	1		1
B16-F10	AAVSNKFRDLL	11	Q8R1U1|COG4_MOUSE	1		1
B16-F10	AAVSNLVRV	9	Q64727|VINC_MOUSE		1	1
B16-F10	AAVVGLVCL	9	Q02053|UBA1_MOUSE	1		1
B16-F10	AAVVNFEEAL	10	Q9ERK4|XPO2_MOUSE	1	1	2
B16-F10	AAVVSVAYL	9	P49282|NRAM2_MOUSE	1	1	2
B16-F10	AAVWNAQEA	9	O08915|AIP_MOUSE		1	1
B16-F10	AAYEFTTL	8	P32233|DRG1_MOUSE	1		1
B16-F10	AAYMNKVEL	9	Q6IME9|K2C72_MOUSE		1	1
B16-F10	AAYRNLGQNL	10	Q8BK67|RCC2_MOUSE		1	1
B16-F10	ACLFNQEAL	9	Q6ZWR6-4|SYNE1_MOUSE:Q6ZWR6|SYNE1_MOUSE		1	1
B16-F10	ADDLDFETGD	10	P63242|IF5A1_MOUSE	1		1
B16-F10	ADIQTERAY	9	P62281|RS11_MOUSE	1	1	2
B16-F10	ADKPDMGEIASFD	13	Q6ZWY8|TYB10_MOUSE	1		1
B16-F10	ADSFSLND	8	P16110|LEG3_MOUSE	1	1	2
B16-F10	ADSFSLNDA	9	P16110|LEG3_MOUSE	1		1
B16-F10	ADSFSLNDAL	10	P16110|LEG3_MOUSE	1		1
B16-F10	ADSFSLNDALA	11	P16110|LEG3_MOUSE	1		1
B16-F10	ADSFSLNDALAG	12	P16110|LEG3_MOUSE	1	1	2
B16-F10	ADSFSLNDALAGS	13	P16110|LEG3_MOUSE	1		1
B16-F10	ADSFSLNDALAGSG	14	P16110|LEG3_MOUSE	1		1
B16-F10	ADVDAADNRKIT	12	Q99NH0|ANR17_MOUSE	1		1
B16-F10	AEGQVLVLD	9	P19253|RL13A_MOUSE	1		1
B16-F10	AENGKLVINGKP	12	P16858|G3P_MOUSE	1	1	2
B16-F10	AETEERSLDNF	11	Q4VAA2|CDV3_MOUSE	1		1
B16-F10	AFANLRKVLISD	12	Q61753|SERA_MOUSE		1	1
B16-F10	AGGVQTVTLIPGD	13	Q9D6R2|IDH3A_MOUSE	1		1
B16-F10	AGIALNDNF	9	P16858|G3P_MOUSE	1	1	2
B16-F10	AGIENKFGL	9	Q9QXX4|CMC2_MOUSE	1	1	2
B16-F10	AGIENKFGLYL	11	Q9QXX4|CMC2_MOUSE	1	1	2
B16-F10	AGIENKFGLYLP	12	Q9QXX4|CMC2_MOUSE	1		1
B16-F10	AGIERMGLAM	10	Q9D0E1|HNRPM_MOUSE	1		1
B16-F10	AGILNHYLI	9	P30355|AL5AP_MOUSE	1		1
B16-F10	AGLLNNPHFI	10	Q8BJU0|SGTA_MOUSE	1	1	2
B16-F10	AGLRLLTNM	9	Q9D0L7|ARM10_MOUSE:Q9CX83|ARMX1_MOUSE:Q8BHS6|ARMX3_MOUSE	1	1	2
B16-F10	AGLTHIITM	9	Q9D0M1|KPRA_MOUSE	1	1	2
B16-F10	AGLTHLITM	9	Q8R574|KPRB_MOUSE	1	1	2
B16-F10	AGLVNIVSF	9	Q8BJL0-3|SMAL1_MOUSE:Q8BJL0-2|SMAL1_MOUSE:Q8BJL0|SMAL1_MOUSE		1	1
B16-F10	AGLVNVVLV	9	O70423-2|AOC3_MOUSE:O70423|AOC3_MOUSE		1	1
B16-F10	AGPENSSKI	9	Q80XK6|ATG2B_MOUSE	1	1	2
B16-F10	AGPSNFGTEL	10	P0C090|RC3H2_MOUSE		1	1
B16-F10	AGPTNSLKYVP	11	Q8BMI0|FBX38_MOUSE		1	1
B16-F10	AGPTNVHLI	9	P70178|SIX5_MOUSE	1	1	2
B16-F10	AGQAFRKFLPLFD	13	Q64433|CH10_MOUSE		1	1
B16-F10	AGRKLALKTID	11	Q9DCX2|ATP5H_MOUSE	1	1	2
B16-F10	AGTRNIYYL	9	Q9CQN1|TRAP1_MOUSE	1	1	2
B16-F10	AGVENVSEL	9	Q9WUB3|PYGM_MOUSE		1	1
B16-F10	AGVRNPQQHL	10	P29341|PABP1_MOUSE	1	1	2
B16-F10	AGVSNIIEF	9	Q9D2L9|F111A_MOUSE	1		1
B16-F10	AGVVNKYEV	9	O88455|DHCR7_MOUSE	1	1	2
B16-F10	AHVDVKTTDGYLL	13	P97351|RS3A_MOUSE	1		1
B16-F10	AIMPNGDHI	9	P63005|LIS1_MOUSE		1	1
B16-F10	AISNLDYI	8	Q9R0C8|VAV3_MOUSE		1	1
B16-F10	AISPGKHYL	9	Q2EMV9|PAR14_MOUSE		1	1
B16-F10	AIVRNLESL	9	P58064|RT06_MOUSE		1	1
B16-F10	AKDIGFIKLD	10	P62274|RS29_MOUSE	1	1	2
B16-F10	AKDVKFGAD	9	P63038|CH60_MOUSE	1		1
B16-F10	AKDVKFGADARALM	14	P63038|CH60_MOUSE		1	1
B16-F10	AKFMTPVIQD	10	O70194|EIF3D_MOUSE	1		1
B16-F10	AKHEQILVLD	10	Q9WV55|VAPA_MOUSE	1	1	2
B16-F10	AKLVNQEVL	9	Q91VD9|NDUS1_MOUSE	1	1	2
B16-F10	ALANHLIKV	9	Q9WVK4|EHD1_MOUSE:Q9QXY6|EHD3_MOUSE	1		1
B16-F10	ALDVANKIGII	11	P62751|RL23A_MOUSE	1	1	2
B16-F10	ALINADEL	8	P16546|SPTN1_MOUSE	1	1	2
B16-F10	ALIQNADTL	9	P55194|3BP1_MOUSE		1	1
B16-F10	ALLNGEYL	8	Q4VBE8|WDR18_MOUSE	1	1	2
B16-F10	ALLQNKDVI	9	P51569|AGAL_MOUSE		1	1
B16-F10	ALPFRKDLGD	10	Q9JHJ0|TMOD3_MOUSE	1		1
B16-F10	ALPFRKDLGDYKD	13	Q9JHJ0|TMOD3_MOUSE	1		1
B16-F10	ALPKAVVKLD	10	P08508|FCGR3_MOUSE	1	1	2
B16-F10	AMADTFLEHM	10	P52480|KPYM_MOUSE	1	1	2
B16-F10	AMAPRTLLL	9	P01899|HA11_MOUSE	1	1	2
B16-F10	AMFDQSQIQEF	11	Q3THE2|ML12B_MOUSE	1		1
B16-F10	AMGVNLTSM	9	P17918|PCNA_MOUSE	1	1	2
B16-F10	AMGVNMETA	9	P62814|VATB2_MOUSE	1	1	2
B16-F10	AMLENLLSM	9	Q3V300|KIF22_MOUSE		1	1
B16-F10	AMLTNLESL	9	Q8BZQ7|ANC2_MOUSE	1	1	2
B16-F10	AMMAKAEYL	9	Q99JI4|PSMD6_MOUSE		1	1
B16-F10	AMNIPIPFNL	10	Q9EPU0|RENT1_MOUSE	1		1
B16-F10	AMNVNDLFL	9	P61021|RAB5B_MOUSE		1	1
B16-F10	AMNVNEIFM	9	P35278|RAB5C_MOUSE	1	1	2
B16-F10	AMPINKATI	9	O88967|YMEL1_MOUSE		1	1
B16-F10	AMPRLTLPFL	10	O35678|MGLL_MOUSE	1	1	2
B16-F10	AMVSEFLKQA	10	P10107|ANXA1_MOUSE	1	1	2
B16-F10	AMYVHAYTL	9	O70435|PSA3_MOUSE	1	1	2
B16-F10	ANLERTFIAIKPD	13	Q01768|NDKB_MOUSE	1		1
B16-F10	APRPPPKPM	9	P62855|RS26_MOUSE	1		1
B16-F10	AQILNQVMM	9	O08901|BUB1_MOUSE	1	1	2
B16-F10	AQLAKKDYL	9	O70145|NCF2_MOUSE	1	1	2
B16-F10	AQLANTTAI	9	Q9R1C7|PR40A_MOUSE	1	1	2
B16-F10	AQLQNQQSF	9	Q9D1L0|CHCH2_MOUSE	1	1	2
B16-F10	AQMQNPDTL	9	Q8R317-2|UBQL1_MOUSE		1	1
B16-F10	AQPGASGMLTPM	12	Q7TN29|SMAP2_MOUSE		1	1
B16-F10	AQPSNSLLGEL	11	Q9CW46|RAVR1_MOUSE	1		1
B16-F10	AQPVNVQQL	9	Q8CHI8|EP400_MOUSE	1	1	2
B16-F10	AQQAADKYLYVD	12	Q8VDD5|MYH9_MOUSE	1		1
B16-F10	AQVQNSEQL	9	Q91WG2|RABE2_MOUSE	1	1	2
B16-F10	AQVRNQGYL	9	Q3UXL4|KIZ_MOUSE	1		1
B16-F10	AQVSNVVYL	9	Q8BJE2|BTNL9_MOUSE:Q8BJE2-2|BTNL9_MOUSE		1	1
B16-F10	AQYGNILKHVM	11	Q8R4R6|NUP53_MOUSE	1	1	2
B16-F10	ASAINWTLI	9	Q8K009|AL1L2_MOUSE:Q8R0Y6|AL1L1_MOUSE		1	1
B16-F10	ASARNLEHL	9	Q8BMI0|FBX38_MOUSE	1		1
B16-F10	ASAVSNNYIQTL	12	P30999|CTND1_MOUSE	1		1
B16-F10	ASEAIKGAVVGID	13	P38647|GRP75_MOUSE		1	1
B16-F10	ASFDKVAIPEV	11	P83741|WNK1_MOUSE	1		1
B16-F10	ASFLLNLRRQLP	12	Q9WTI7|MYO1C_MOUSE	1		1
B16-F10	ASFPTTKTYFPHF	13	P01942|HBA_MOUSE	1		1
B16-F10	ASFSNGPVL	9	Q5F2E7|NUFP2_MOUSE:Q5F2E7-2|NUFP2_MOUSE		1	1
B16-F10	ASGNAQIGKSAPD	13	Q61171|PRDX2_MOUSE	1		1
B16-F10	ASGVAVSDGVIKVF	14	P18760|COF1_MOUSE	1		1
B16-F10	ASHENPVDILI	11	Q8BIF9|ZN787_MOUSE	1		1
B16-F10	ASHLNLDAL	9	Q8CH72|TRI32_MOUSE	1	1	2
B16-F10	ASIANLINL	9	Q80TH2-1|ERBIN_MOUSE:Q80TH2|ERBIN_MOUSE:Q80TH2-2|ERBIN_MOUSE		1	1
B16-F10	ASIENTSTL	9	Q5SPL2|PHF12_MOUSE	1	1	2
B16-F10	ASIQNGKDSL	10	Q05512|MARK2_MOUSE		1	1
B16-F10	ASIVNKDGL	9	P35396|PPARD_MOUSE	1	1	2
B16-F10	ASLQLISHI	9	P27641|XRCC5_MOUSE		1	1
B16-F10	ASLQNFNISNL	11	P83741|WNK1_MOUSE	1		1
B16-F10	ASLSNLHSL	9	Q9D1C2|CBY1_MOUSE		1	1
B16-F10	ASLSNRLYI	9	E9Q3L2|PI4KA_MOUSE	1	1	2
B16-F10	ASLTNNQNL	9	F6ZDS4|TPR_MOUSE	1	1	2
B16-F10	ASLTNPFGKGAFI	13	Q99LH1|NOG2_MOUSE	1	1	2
B16-F10	ASLTNQDAL	9	Q9QXZ0|MACF1_MOUSE	1	1	2
B16-F10	ASLVNADKL	9	P59016|VP33B_MOUSE	1	1	2
B16-F10	ASLVNHVLL	9	Q8BHK9|ERC6L_MOUSE	1	1	2
B16-F10	ASLVNSPSYL	10	Q3U3D7|T131L_MOUSE	1	1	2
B16-F10	ASMINVEYL	9	O88491|NSD1_MOUSE	1	1	2
B16-F10	ASMMNLENI	9	G5E861|SCLT1_MOUSE	1		1
B16-F10	ASMSNDFKSVL	11	Q8K1E0|STX5_MOUSE	1	1	2
B16-F10	ASMTNRELM	9	Q8VDL4|ADPGK_MOUSE	1	1	2
B16-F10	ASNDYTQQATQSYG	14	P56959|FUS_MOUSE	1		1
B16-F10	ASNVTNKTD	9	Q9Z204|HNRPC_MOUSE	1	1	2
B16-F10	ASPANVGTL	9	Q3UMB5|SMCR8_MOUSE	1	1	2
B16-F10	ASPEGQDYL	9	Q99LF4|RTCB_MOUSE	1	1	2
B16-F10	ASPSSVEVHPV	11	Q8BYK6|YTHD3_MOUSE:Q8BYK6-2|YTHD3_MOUSE:Q8BYK6-3|YTHD3_MOUSE		1	1
B16-F10	ASPTNPTAI	9	Q6PD24|AN13D_MOUSE		1	1
B16-F10	ASPVNRIVQM	10	Q8CH25-2|SLTM_MOUSE:Q8CH25|SLTM_MOUSE		1	1
B16-F10	ASTTNQQEI	9	Q99JR8|SMRD2_MOUSE	1		1
B16-F10	ASVESASGETL	11	P29699|FETUA_MOUSE		1	1
B16-F10	ASVINGHTL	9	B2RXR6|ANR44_MOUSE	1	1	2
B16-F10	ASVKEWTITY	10	O88342|WDR1_MOUSE	1		1
B16-F10	ASVLNKWQM	9	Q91VR5|DDX1_MOUSE	1		1
B16-F10	ASVLNLCEV	9	Q6ZWR6|SYNE1_MOUSE	1	1	2
B16-F10	ASVLNTDPAL	10	Q99KK7|DPP3_MOUSE		1	1
B16-F10	ASVLNVNHI	9	Q99NH0|ANR17_MOUSE	1	1	2
B16-F10	ASVQNEAKL	9	Q9WUM4|COR1C_MOUSE	1	1	2
B16-F10	ASVSNPLFL	9	P70428|EXT2_MOUSE	1	1	2
B16-F10	ASVTGAEAI	9	Q91ZV8|AGRA2_MOUSE	1	1	2
B16-F10	ASVVNLLKDVL	11	A8C756|THADA_MOUSE:A8C756-4|THADA_MOUSE		1	1
B16-F10	ASYEFVQRL	9	Q9JHU4|DYHC1_MOUSE	1		1
B16-F10	ASYRAQPSVSL	11	Q8C2Q3|RBM14_MOUSE		1	1
B16-F10	ASYVNLPTI	9	P14206|RSSA_MOUSE	1		1
B16-F10	ATIINEEVL	9	P14576|SRP54_MOUSE	1	1	2
B16-F10	ATISNDGATI	10	P80313|TCPH_MOUSE	1	1	2
B16-F10	ATLKEKLIASVAD	13	P16125|LDHB_MOUSE	1	1	2
B16-F10	ATLKEKLIASVADD	14	P16125|LDHB_MOUSE	1		1
B16-F10	ATLKNTEKI	9	P98197|AT11A_MOUSE		1	1
B16-F10	ATLQNELQSSL	11	Q9Z0U0-2|XPR1_MOUSE:Q9Z0U0|XPR1_MOUSE		1	1
B16-F10	ATLVFHNL	8	P42227|STAT3_MOUSE	1	1	2
B16-F10	ATPGRLIDFL	10	Q61656|DDX5_MOUSE	1		1
B16-F10	ATRGTVTDFPGFD	13	P48036|ANXA5_MOUSE	1		1
B16-F10	ATVKNAGLI	9	P97929|BRCA2_MOUSE		1	1
B16-F10	ATVSNGPFL	9	Q69ZF8|MSL2_MOUSE	1	1	2
B16-F10	ATVSYED	7	Q61545|EWS_MOUSE	1		1
B16-F10	AVIENLKYFL	10	Q9JMG2|C1GLC_MOUSE	1		1
B16-F10	AVISLEGKPL	10	P18760|COF1_MOUSE		1	1
B16-F10	AVLRNIVHL	9	Q8C522|ENDD1_MOUSE	1	1	2
B16-F10	AVLTNPETL	9	Q9R0E1|PLOD3_MOUSE		1	1
B16-F10	AVLTNQETI	9	Q3UGY8|BIG3_MOUSE	1	1	2
B16-F10	AVPIQSPAD	9	Q9EP89|LACTB_MOUSE		1	1
B16-F10	AVQISKKRKFVAD	13	P62908|RS3_MOUSE	1		1
B16-F10	AVSNNYIQTL	10	P30999|CTND1_MOUSE	1	1	2
B16-F10	AVVLNATWL	9	P13011|ACOD2_MOUSE:Q99PL7|SCD3_MOUSE	1	1	2
B16-F10	AVVTNAMII	9	Q6P9J9|ANO6_MOUSE:Q6P9J9-2|ANO6_MOUSE		1	1
B16-F10	AYEGRDYIAL	10	P01899|HA11_MOUSE	1		1
B16-F10	CALANGEGL	9	Q99ME2|WDR6_MOUSE		1	1
B16-F10	CAPNNGYFMI	10	Q6GQT9|NOMO1_MOUSE		1	1
B16-F10	CAVIDVDVI	9	Q8BHC4|DCAKD_MOUSE	1	1	2
B16-F10	CKCLLAGGGGYEEF	14	Q5U430|UBR3_MOUSE	1		1
B16-F10	CMLTNPELL	9	Q921G8|GCP2_MOUSE		1	1
B16-F10	CNECGKSFSQWSK	13	Q6A085|ZN629_MOUSE	1		1
B16-F10	CSLQNKLVI	9	Q9CQU5|ZWINT_MOUSE	1	1	2
B16-F10	CTIVNIHEL	9	Q6RI63-2|F120B_MOUSE:Q6RI63|F120B_MOUSE		1	1
B16-F10	DAIHNFDFL	9	Q5XF89|AT133_MOUSE	1	1	2
B16-F10	DALSNVDLL	9	Q7TMB8-2|CYFP1_MOUSE:Q7TMB8|CYFP1_MOUSE		1	1
B16-F10	DALTNLTVL	9	Q3UM45|PP1R7_MOUSE		1	1
B16-F10	DAVKNGDYI	9	Q3TYA6|MPP8_MOUSE	1	1	2
B16-F10	DDDIAALVVD	10	P60710|ACTB_MOUSE	1		1
B16-F10	DDDIAALVVDNG	12	P60710|ACTB_MOUSE	1		1
B16-F10	DDDIAALVVDNGSG	14	P60710|ACTB_MOUSE	1		1
B16-F10	DDESDPFEVLKA	12	Q9CY58|PAIRB_MOUSE	1		1
B16-F10	DEIFLRDLPIVF	12	Q99P91|GPNMB_MOUSE	1		1
B16-F10	DEIFLRDLPIVFD	13	Q99P91|GPNMB_MOUSE	1		1
B16-F10	DFGSLSNLQVTQP	13	P63276|RS17_MOUSE	1		1
B16-F10	DGVANVEHI	9	Q9D020|5NT3A_MOUSE	1	1	2
B16-F10	DIGFIKLD	8	P62274|RS29_MOUSE	1	1	2
B16-F10	DIQLTHVQT	9	O08573|LEG9_MOUSE	1		1
B16-F10	DIQNTQCLLNVEHL	14	Q78PY7|SND1_MOUSE	1		1
B16-F10	DITLTSANHAMI	12	P16110|LEG3_MOUSE	1	1	2
B16-F10	DLKNLIVL	8	A6H5Z3-2|EXC6B_MOUSE:A6H5Z3|EXC6B_MOUSE		1	1
B16-F10	DPAIYFKEQFLD	12	P14211|CALR_MOUSE	1		1
B16-F10	DPAIYFKEQFLDGD	14	P14211|CALR_MOUSE	1		1
B16-F10	DPKFEVIDKPQS	12	P97450|ATP5J_MOUSE	1	1	2
B16-F10	DPPSAKAAID	10	P56959|FUS_MOUSE	1		1
B16-F10	DPPSAKAAIDWFD	13	P56959|FUS_MOUSE	1		1
B16-F10	DQIQNAQYL	9	P61979-3|HNRPK_MOUSE:P61979|HNRPK_MOUSE:P61979-2|HNRPK_MOUSE		1	1
B16-F10	DSLVNQEVL	9	P70700|RPA2_MOUSE		1	1
B16-F10	DVDDPEAFPALA	12	Q9CY58|PAIRB_MOUSE	1		1
B16-F10	EDKGEFLSEGGGVR	14	E9PV24|FIBA_MOUSE	1		1
B16-F10	EEEIAALVID	10	P63260|ACTG_MOUSE	1		1
B16-F10	EEESPGQAKDEL	12	P14211|CALR_MOUSE	1	1	2
B16-F10	EETEHDYQNHI	11	P08101|FCGR2_MOUSE	1		1
B16-F10	EGINNLTHM	9	Q8C8U0|LIPB1_MOUSE:Q8C8U0-3|LIPB1_MOUSE:Q8C8U0-2|LIPB1_MOUSE		1	1
B16-F10	ELDHALNDMTSI	12	P58771|TPM1_MOUSE	1		1
B16-F10	ELVGNLIVF	9	Q8VI47|MRP2_MOUSE	1		1
B16-F10	ESAISNLDYI	10	Q9R0C8|VAV3_MOUSE	1		1
B16-F10	ESGPSIVHRKCF	12	P60710|ACTB_MOUSE:P63260|ACTG_MOUSE	1		1
B16-F10	ESPINVTTV	9	Q65Z40|WAPL_MOUSE		1	1
B16-F10	ETIMNQEKL	9	Q64152|BTF3_MOUSE:Q64152-2|BTF3_MOUSE		1	1
B16-F10	ETKHFLRNHPLIF	13	Q60696|PMEL_MOUSE	1		1
B16-F10	ETKHFLRNHPLIFA	14	Q60696|PMEL_MOUSE	1		1
B16-F10	FAFRNFLYL	9	Q6DIC0|SMCA2_MOUSE		1	1
B16-F10	FAGINQDLL	9	Q91XQ0|DYH8_MOUSE		1	1
B16-F10	FAHHNRYVL	9	P16879|FES_MOUSE	1	1	2
B16-F10	FAHIDGDHL	9	O35286|DHX15_MOUSE	1	1	2
B16-F10	FAHTNIESL	9	P27773|PDIA3_MOUSE		1	1
B16-F10	FAHTNIESLV	10	P27773|PDIA3_MOUSE	1		1
B16-F10	FAIDDHDYL	9	Q91XU3|PI42C_MOUSE	1	1	2
B16-F10	FAIINSNPIEL	11	O70472|TM131_MOUSE	1		1
B16-F10	FAIQNPTLI	9	Q9D2H6|SP2_MOUSE	1	1	2
B16-F10	FAIRNILDYV	10	Q8CAS9|PARP9_MOUSE	1	1	2
B16-F10	FAIYNGEWDL	10	Q6P9N1|HYCCI_MOUSE		1	1
B16-F10	FALAMKDTL	9	Q8VHH7|ADCY3_MOUSE	1	1	2
B16-F10	FALANEHYL	9	Q8BH82|NAPEP_MOUSE	1		1
B16-F10	FALANHLIKV	10	Q9WVK4|EHD1_MOUSE:Q9QXY6|EHD3_MOUSE	1	1	2
B16-F10	FALINKLDI	9	Q9Z2A5-2|ATE1_MOUSE:Q9Z2A5|ATE1_MOUSE		1	1
B16-F10	FALKNPFYSL	10	Q9ES56|TPPC4_MOUSE	1	1	2
B16-F10	FALNNPEMV	9	Q62433|NDRG1_MOUSE	1	1	2
B16-F10	FALVNGNNI	9	P22892|AP1G1_MOUSE	1	1	2
B16-F10	FALYNAANL	9	E2JF22|PIEZ1_MOUSE	1		1
B16-F10	FAPKNIYSI	9	P09581|CSF1R_MOUSE	1	1	2
B16-F10	FAPNSVHYL	9	Q99NF8|RBP17_MOUSE		1	1
B16-F10	FAPPQGSPVM	10	Q8CFE4-2|SCYL2_MOUSE:Q8CFE4|SCYL2_MOUSE		1	1
B16-F10	FAPVNVTTEV	10	P10126|EF1A1_MOUSE	1	1	2
B16-F10	FAPVNVTTEVK	11	P10126|EF1A1_MOUSE	1	1	2
B16-F10	FAPVNVTTEVKS	12	P10126|EF1A1_MOUSE		1	1
B16-F10	FAPVNVTTEVKSV	13	P10126|EF1A1_MOUSE	1	1	2
B16-F10	FAPVNVTTEVKSVE	14	P10126|EF1A1_MOUSE	1	1	2
B16-F10	FAPYNKPSL	9	Q8R3P2-2|DTX2_MOUSE:Q8R3P2|DTX2_MOUSE:Q8R3P2-3|DTX2_MOUSE		1	1
B16-F10	FAQEALTVL	9	Q76MZ3|2AAA_MOUSE	1	1	2
B16-F10	FATNNSEHI	9	Q6A068|CDC5L_MOUSE	1		1
B16-F10	FAVVNHQGTL	10	Q5DU02|UBP22_MOUSE:Q8CEG8|UBP27_MOUSE	1	1	2
B16-F10	FAYEGRDYI	9	P01899|HA11_MOUSE	1	1	2
B16-F10	FAYTVKYVL	9	Q6P073|UB2J2_MOUSE	1	1	2
B16-F10	FCYVNDIVL	9	O09106|HDAC1_MOUSE	1		1
B16-F10	FFPPVTNEEL	10	P29812|TYRP2_MOUSE	1	1	2
B16-F10	FGATNWDLI	9	Q8BK67|RCC2_MOUSE		1	1
B16-F10	FGGSGTSSRP	10	P20152|VIME_MOUSE	1	1	2
B16-F10	FGGSNVHVI	9	P19096|FAS_MOUSE		1	1
B16-F10	FGGTKTDFL	9	Q6YGZ1|HPSE_MOUSE	1		1
B16-F10	FGIDNFEFI	9	P23298|KPCL_MOUSE	1		1
B16-F10	FGIHNGVETL	10	Q8C0L9|GPCP1_MOUSE	1	1	2
B16-F10	FGIKNFSAI	9	Q8BMF4|ODP2_MOUSE	1		1
B16-F10	FGITNLVEHPA	11	Q922U1|PRPF3_MOUSE		1	1
B16-F10	FGLGAEQRPPAA	12	Q9Z103|ADNP_MOUSE		1	1
B16-F10	FGLHLIDFM	9	Q8C156|CND2_MOUSE		1	1
B16-F10	FGLLNPVAV	9	Q61982|NOTC3_MOUSE		1	1
B16-F10	FGLRNLERL	9	P58682|TLR8_MOUSE		1	1
B16-F10	FGLSARDLDEL	11	Q8K310|MATR3_MOUSE	1		1
B16-F10	FGPINSVAF	9	Q9QZD9|EIF3I_MOUSE	1	1	2
B16-F10	FGPVNHEEL	9	P46414|CDN1B_MOUSE	1	1	2
B16-F10	FGPVSGAQIQF	11	Q7M6Y3|PICAL_MOUSE	1		1
B16-F10	FGPVSGAQIQFM	12	Q7M6Y3|PICAL_MOUSE	1	1	2
B16-F10	FGVLNVQTV	9	Q9R049-2|AMFR_MOUSE:Q9R049|AMFR_MOUSE		1	1
B16-F10	FHSGTPAASF	10	Q80X50|UBP2L_MOUSE	1	1	2
B16-F10	FHVQNIDLL	9	Q4QY64|ATAD5_MOUSE	1	1	2
B16-F10	FIHNNLKDVYI	11	O89032|SPD2A_MOUSE	1		1
B16-F10	FIRNQEQM	8	P62192|PRS4_MOUSE		1	1
B16-F10	FLGASLKDEVL	11	P25444|RS2_MOUSE	1		1
B16-F10	FLGTGQESF	9	P07147|TYRP1_MOUSE	1	1	2
B16-F10	FLNVNCEHI	9	P49717|MCM4_MOUSE		1	1
B16-F10	FLQLFGLTTQQQK	13	Q3U3C9-4|GSE1_MOUSE:Q3U3C9-3|GSE1_MOUSE:Q3U3C9|GSE1_MOUSE:Q3U3C9-2|GSE1_MOUSE		1	1
B16-F10	FMATNPEHL	9	Q2HXL6|EDEM3_MOUSE		1	1
B16-F10	FMATNSLHL	9	Q7TQK0|CCNT2_MOUSE:Q9QWV9|CCNT1_MOUSE	1	1	2
B16-F10	FMGVNMDVI	9	Q3TIR3|RIC8A_MOUSE	1		1
B16-F10	FMISHLDYL	9	Q62388|ATM_MOUSE	1	1	2
B16-F10	FMLALKENI	9	Q9Z207|DIAP3_MOUSE	1	1	2
B16-F10	FMVEKGPTL	9	Q6P073|UB2J2_MOUSE		1	1
B16-F10	FNIRVATI	8	Q61168|LAPM5_MOUSE	1	1	2
B16-F10	FQAINAGHI	9	Q0VGY8|TANC1_MOUSE:Q0VGY8-2|TANC1_MOUSE		1	1
B16-F10	FQFINPTTI	9	Q8C0M0-2|WDR59_MOUSE:Q8C0M0|WDR59_MOUSE:Q8C0M0-3|WDR59_MOUSE		1	1
B16-F10	FQFPDVDFL	9	Q06890|CLUS_MOUSE	1	1	2
B16-F10	FQGKNLETV	9	B2RXS4|PLXB2_MOUSE		1	1
B16-F10	FQGTSLTHL	9	Q8BMT4-2|NRROS_MOUSE:Q8BMT4|NRROS_MOUSE:Q8BMT4-3|NRROS_MOUSE		1	1
B16-F10	FQHPNTDML	9	Q63918|CAVN2_MOUSE		1	1
B16-F10	FQIVNPHLL	9	P07742|RIR1_MOUSE	1	1	2
B16-F10	FQLINVEDF	9	Q8CFQ3|AQR_MOUSE	1		1
B16-F10	FQLQNPFLL	9	Q3U564-2|DCP1B_MOUSE:Q3U564|DCP1B_MOUSE		1	1
B16-F10	FQLRLAEVL	9	Q8R5K4|NOL6_MOUSE	1	1	2
B16-F10	FQNVNSVTL	9	Q8CDN6|TXNL1_MOUSE		1	1
B16-F10	FQVKNPPHTYI	11	A2APV2-2|FMNL2_MOUSE:A2APV2|FMNL2_MOUSE:A2APV2-3|FMNL2_MOUSE		1	1
B16-F10	FQVTHTVAL	9	Q9QYA2|TOM40_MOUSE		1	1
B16-F10	FQWRNLNTI	9	Q8BIR2|ASTE1_MOUSE	1		1
B16-F10	FQYDSTHGKFNGTV	14	P16858|G3P_MOUSE		1	1
B16-F10	FQYESKVFYL	10	P68510|1433F_MOUSE		1	1
B16-F10	FQYGPAVFPVA	11	Q80X50|UBP2L_MOUSE	1	1	2
B16-F10	FRDLGRLR	8	O35973|PER1_MOUSE	1		1
B16-F10	FSATFPKEIQM	11	Q62167|DDX3X_MOUSE	1		1
B16-F10	FSEENHEPL	9	Q9EQH3|VPS35_MOUSE	1	1	2
B16-F10	FSFRNTQEVI	10	Q80SU7|GVIN1_MOUSE	1	1	2
B16-F10	FSGHNLEYL	9	Q8R3J5|CHAC1_MOUSE	1	1	2
B16-F10	FSHEGPAFL	9	P07147|TYRP1_MOUSE	1	1	2
B16-F10	FSHPNVLPVL	10	O55222|ILK_MOUSE		1	1
B16-F10	FSIALHFPG	9	Q60696|PMEL_MOUSE	1		1
B16-F10	FSITDQQTL	9	C3VPR6|NLRC5_MOUSE	1	1	2
B16-F10	FSKVNIQVL	9	Q9Z2F2|OASL2_MOUSE		1	1
B16-F10	FSLDNSSSHL	10	Q8BYN5|FSD1L_MOUSE		1	1
B16-F10	FSLINWDDL	9	Q9WVC6|SGK1_MOUSE		1	1
B16-F10	FSLQNQLRL	9	Q9JJ28|FLII_MOUSE		1	1
B16-F10	FSLTNGMYP	9	P47911|RL6_MOUSE		1	1
B16-F10	FSLVGFTQM	9	Q9CY27|TECR_MOUSE		1	1
B16-F10	FSNKNLEEL	9	Q8C0S1-2|DI3L1_MOUSE:Q8C0S1|DI3L1_MOUSE		1	1
B16-F10	FSNVNLKEV	9	Q3U1J4|DDB1_MOUSE		1	1
B16-F10	FSPFNPTSL	9	Q9Z2U4|ELF4_MOUSE		1	1
B16-F10	FSPLNPMRVHI	11	P70333|HNRH2_MOUSE	1		1
B16-F10	FSPLNPVRV	9	Q9Z2X1|HNRPF_MOUSE	1	1	2
B16-F10	FSPLNPVRVHI	11	Q9Z2X1|HNRPF_MOUSE	1	1	2
B16-F10	FSPPTLPGNFL	11	Q8C570|RAE1L_MOUSE	1	1	2
B16-F10	FSPTNPAHL	9	A6PWY4-2|WDR76_MOUSE:A6PWY4|WDR76_MOUSE		1	1
B16-F10	FSPTNPAHLL	10	A6PWY4|WDR76_MOUSE	1	1	2
B16-F10	FSPVSIATA	9	Q00897|A1AT4_MOUSE:P22599|A1AT2_MOUSE:Q00898|A1AT5_MOUSE	1	1	2
B16-F10	FSPVSIATAFA	11	Q00897|A1AT4_MOUSE:P22599|A1AT2_MOUSE:Q00898|A1AT5_MOUSE	1	1	2
B16-F10	FSQENTEKI	9	Q8CIG0|DEP1A_MOUSE	1	1	2
B16-F10	FSVEGQENL	9	Q9DBC3|CMTR1_MOUSE		1	1
B16-F10	FSVENKWRL	9	P17665|COX7C_MOUSE	1		1
B16-F10	FSVLNWDQV	9	Q5SSF7|TET5C_MOUSE		1	1
B16-F10	FSVTNPHTM	9	Q8CDD9|LRIF1_MOUSE	1	1	2
B16-F10	FSYKIDFAEM	10	Q8CFF0|PAR11_MOUSE	1	1	2
B16-F10	FSYLNPQEL	9	Q8C2S5|FBXL5_MOUSE	1	1	2
B16-F10	FSYMGPSQRPL	11	Q04888|SOX10_MOUSE		1	1
B16-F10	FTAQVIILNHP	11	P10126|EF1A1_MOUSE	1		1
B16-F10	FTGILQLLQ	9	Q7TPD0|INT3_MOUSE	1		1
B16-F10	FTIENKTPQ	9	Q78PY7|SND1_MOUSE		1	1
B16-F10	FTITDQVPF	9	Q60696|PMEL_MOUSE	1	1	2
B16-F10	FTLANVKEL	9	Q9Z179|SHCBP_MOUSE	1		1
B16-F10	FTVSNFVDNL	10	Q69ZK9|NLGN2_MOUSE		1	1
B16-F10	FTVTNTDCL	9	O54956|DPOE2_MOUSE		1	1
B16-F10	FVDGLMIHSGD	11	P62908|RS3_MOUSE	1		1
B16-F10	FVEGLRVFD	9	P05977|MYL1_MOUSE:P09541|MYL4_MOUSE	1		1
B16-F10	FVHPGAATVPTM	12	Q9DCP9|DAZP2_MOUSE		1	1
B16-F10	FVIFNNTYI	9	Q8VBW6|ULA1_MOUSE		1	1
B16-F10	FVIRNIVEA	9	P62855|RS26_MOUSE	1	1	2
B16-F10	FVIRNIVEAAA	11	P62855|RS26_MOUSE	1		1
B16-F10	FVISNYREQL	10	Q3UJC8|CE034_MOUSE	1	1	2
B16-F10	FVKLISWYDNE	11	P16858|G3P_MOUSE	1		1
B16-F10	FVRINQDYI	9	Q497V5-2|SRBD1_MOUSE:Q497V5|SRBD1_MOUSE		1	1
B16-F10	FVTWHRYHL	9	P29812|TYRP2_MOUSE	1		1
B16-F10	GAIENAFHL	9	Q149T7|PPM1J_MOUSE	1		1
B16-F10	GAIRNAAFL	9	Q8C5G2|VASH2_MOUSE	1		1
B16-F10	GAIRNGGLYV	10	Q80V03-2|ADCK5_MOUSE:Q80V03|ADCK5_MOUSE		1	1
B16-F10	GAIVDQMTL	9	O09159|MA2B1_MOUSE	1	1	2
B16-F10	GAIVNGKVL	9	Q6GYP7|RGPA1_MOUSE	1	1	2
B16-F10	GALKNIVAV	9	Q3ULJ0-2|GPD1L_MOUSE:P13707|GPDA_MOUSE:Q3ULJ0|GPD1L_MOUSE		1	1
B16-F10	GALKNLSVI	9	F2Z461|HERC6_MOUSE	1	1	2
B16-F10	GALKNLSVIYI	11	F2Z461|HERC6_MOUSE	1	1	2
B16-F10	GALKNTDYF	9	Q9D020-1|5NT3A_MOUSE:Q9D020|5NT3A_MOUSE		1	1
B16-F10	GALVNAIFL	9	Q60738|ZNT1_MOUSE		1	1
B16-F10	GANVNHTTV	9	Q9Z2G0|FEM1B_MOUSE	1	1	2
B16-F10	GAPENSGISTL	11	F8VPU2|FARP1_MOUSE		1	1
B16-F10	GAPGPLGPPG	10	Q63870|CO7A1_MOUSE		1	1
B16-F10	GAPINKYVV	9	Q8BX90|FND3A_MOUSE		1	1
B16-F10	GAPINVMFL	9	P58242|ASM3B_MOUSE		1	1
B16-F10	GAPLNLVDL	9	Q9QWT9|KIFC1_MOUSE	1	1	2
B16-F10	GAPSNPDVF	9	Q9JI75|NQO2_MOUSE		1	1
B16-F10	GAVENPEYL	9	P70424|ERBB2_MOUSE		1	1
B16-F10	GAVFNGITL	9	Q9ES97|RTN3_MOUSE	1	1	2
B16-F10	GAVKNLTYF	9	Q91Y74|SIA4C_MOUSE	1	1	2
B16-F10	GAVLNDPYM	9	O88196|TTC3_MOUSE	1	1	2
B16-F10	GAVTLQEYL	9	Q68FF6|GIT1_MOUSE	1	1	2
B16-F10	GAVTNVKVI	9	Q60899|ELAV2_MOUSE:P70372|ELAV1_MOUSE:Q60900|ELAV3_MOUSE	1	1	2
B16-F10	GAVVNVADL	9	Q3UES3|TNKS2_MOUSE		1	1
B16-F10	GCISNTASYL	10	Q9Z1G4|VPP1_MOUSE:P15920|VPP2_MOUSE:Q920R6|VPP4_MOUSE	1		1
B16-F10	GCVGQPSYAYPVR	13	Q9EPX2|PPN_MOUSE		1	1
B16-F10	GDITLTSANHAMI	13	P16110|LEG3_MOUSE	1	1	2
B16-F10	GDPKEEEEEELVD	13	P99028|QCR6_MOUSE	1	1	2
B16-F10	GDQALSFLKD	10	P48962|ADT1_MOUSE	1	1	2
B16-F10	GESDDSILRLA	11	Q9CQR2|RS21_MOUSE	1		1
B16-F10	GETKHFLRNHPLIF	14	Q60696|PMEL_MOUSE	1		1
B16-F10	GGIQNVGHI	9	P24547|IMDH2_MOUSE	1	1	2
B16-F10	GGLRNVDCL	9	Q9WUN2|TBK1_MOUSE		1	1
B16-F10	GGNFGGRSSGP	11	P49312|ROA1_MOUSE	1		1
B16-F10	GGNINVETI	9	O54734|OST48_MOUSE		1	1
B16-F10	GGNYNDFGNY	10	Q8BG05|ROA3_MOUSE	1		1
B16-F10	GGPENVAEM	9	Q689Z5|SBNO1_MOUSE	1	1	2
B16-F10	GGQVSLRVIND	11	Q60696|PMEL_MOUSE		1	1
B16-F10	GGRVQAVLTSD	11	Q99P91|GPNMB_MOUSE	1	1	2
B16-F10	GGSFGGRSSGSP	12	Q8BG05|ROA3_MOUSE	1		1
B16-F10	GGVGFGGLEAM	11	Q8C854|MYEF2_MOUSE:Q8C854-1|MYEF2_MOUSE:Q8C854-2|MYEF2_MOUSE		1	1
B16-F10	GGVRNGVAL	9	Q8BJW5-2|NOL11_MOUSE		1	1
B16-F10	GGVVNMYHM	9	P28063|PSB8_MOUSE		1	1
B16-F10	GGVVNPNEV	9	P34056-2|AP2A_MOUSE:P34056-3|AP2A_MOUSE:P34056|AP2A_MOUSE:P34056-4|AP2A_MOUSE		1	1
B16-F10	GIFPQDFSI	9	Q61245|COBA1_MOUSE	1	1	2
B16-F10	GINNLTHM	8	Q8C8U0|LIPB1_MOUSE:Q8C8U0-3|LIPB1_MOUSE:Q8C8U0-2|LIPB1_MOUSE		1	1
B16-F10	GIQNVGHI	8	P24547|IMDH2_MOUSE	1		1
B16-F10	GIVSKNF	7	Q9CQR2|RS21_MOUSE	1		1
B16-F10	GIVTNWDDM	9	P60710|ACTB_MOUSE:P63260|ACTG_MOUSE	1		1
B16-F10	GKGEQGPAGPP	11	Q01149|CO1A2_MOUSE		1	1
B16-F10	GKLLNAEYI	9	Q8BL65|ABLM2_MOUSE	1		1
B16-F10	GKTELTPAYF	10	Q8BVI4|DHPR_MOUSE	1		1
B16-F10	GLDVEDVKFVIN	12	Q61656|DDX5_MOUSE	1		1
B16-F10	GLEDERKMLTGSGD	14	P99028|QCR6_MOUSE		1	1
B16-F10	GLEPQPVAL	9	Q9EPN1-3|NBEA_MOUSE:Q9EPN1-4|NBEA_MOUSE:Q9EPN1|NBEA_MOUSE		1	1
B16-F10	GLMTTVHAITATQ	13	P16858|G3P_MOUSE	1		1
B16-F10	GLQKAVVNLD	10	A0A0B4J1G0|FCGR4_MOUSE	1	1	2
B16-F10	GMGFGLERM	9	Q9D0E1|HNRPM_MOUSE	1		1
B16-F10	GMIENGPFL	9	Q80SU7|GVIN1_MOUSE	1	1	2
B16-F10	GMIINVLEL	9	Q8BHL8|PSMF1_MOUSE	1	1	2
B16-F10	GMKLNLDYL	9	Q9QXB9|DRG2_MOUSE		1	1
B16-F10	GNFGGRSSGP	10	P49312|ROA1_MOUSE	1		1
B16-F10	GNFGGSRNMGGP	12	O88569|ROA2_MOUSE	1	1	2
B16-F10	GNVTNITTV	9	Q8BMT4|NRROS_MOUSE	1		1
B16-F10	GNYNNQSSNFGPM	13	P49312|ROA1_MOUSE		1	1
B16-F10	GPMKSGNFGGS	11	O88569|ROA2_MOUSE	1	1	2
B16-F10	GPTNVHLI	8	P70178|SIX5_MOUSE		1	1
B16-F10	GPVEEVKE	8	P18242|CATD_MOUSE	1		1
B16-F10	GPVEEVKELQ	10	P18242|CATD_MOUSE		1	1
B16-F10	GPVNHEEL	8	P46414|CDN1B_MOUSE	1	1	2
B16-F10	GQAQNKVYL	9	A2AWP8|ARGAL_MOUSE	1		1
B16-F10	GQGRNPFFL	9	Q8BND4|INT6L_MOUSE	1	1	2
B16-F10	GQHENIVNL	9	P09581|CSF1R_MOUSE		1	1
B16-F10	GQITNFEYL	9	P97412|LYST_MOUSE	1		1
B16-F10	GQLANFQEM	9	Q9DBT5|AMPD2_MOUSE	1		1
B16-F10	GQLENAEQL	9	Q8CC21|TTC19_MOUSE	1	1	2
B16-F10	GQLSNGDHHF	10	P59326|YTHD1_MOUSE	1	1	2
B16-F10	GQLSNGDHHFM	11	P59326|YTHD1_MOUSE	1	1	2
B16-F10	GQVINLDQL	9	Q3UVG3|F91A1_MOUSE	1	1	2
B16-F10	GQVSLRVIND	10	Q60696|PMEL_MOUSE		1	1
B16-F10	GQVVIIHML	9	Q9Z1T1|AP3B1_MOUSE	1	1	2
B16-F10	GRVQAVLTSD	10	Q99P91|GPNMB_MOUSE	1	1	2
B16-F10	GRVQAVLTSDSPA	13	Q99P91|GPNMB_MOUSE	1	1	2
B16-F10	GRVVEPKRAVSRED	14	Q8BG05|ROA3_MOUSE:P49312|ROA1_MOUSE	1		1
B16-F10	GSASGTTLLEALD	13	P10126|EF1A1_MOUSE	1		1
B16-F10	GSGGFIGYAPSL	12	Q9R0E2|PLOD1_MOUSE		1	1
B16-F10	GSGGSGGYGGRSRY	14	O88569|ROA2_MOUSE	1		1
B16-F10	GSGTNVCEL	9	Q9CQI4|CK074_MOUSE		1	1
B16-F10	GSHTNIHLL	9	Q9Z103|ADNP_MOUSE		1	1
B16-F10	GSIANFTNV	9	Q91V92|ACLY_MOUSE	1	1	2
B16-F10	GSIVNEGYL	9	O55100|SNG1_MOUSE	1	1	2
B16-F10	GSLANHTSI	9	Q9D2N9|VP33A_MOUSE	1	1	2
B16-F10	GSLKNVTTL	9	Q80TH2|ERBIN_MOUSE	1	1	2
B16-F10	GSLRNLEEL	9	Q9JIB3|BIR1G_MOUSE:Q9QWK5|BIR1A_MOUSE:Q9R016|BIR1E_MOUSE:Q9JIB6|BIR1F_MOUSE	1		1
B16-F10	GSLSNHTEL	9	Q6NZL6|TONSL_MOUSE	1	1	2
B16-F10	GSLSNSVFL	9	Q7TN22-2|TXD16_MOUSE:Q7TN22|TXD16_MOUSE		1	1
B16-F10	GSLTNLHTL	9	Q03172|ZEP1_MOUSE		1	1
B16-F10	GSLVHISYL	9	P08775|RPB1_MOUSE		1	1
B16-F10	GSPMNTTQL	9	Q9EST8|IKBZ_MOUSE:Q9EST8-2|IKBZ_MOUSE		1	1
B16-F10	GSPTNLDKI	9	P21952|PO3F1_MOUSE	1		1
B16-F10	GSPTSYFTSGL	11	Q9CW46|RAVR1_MOUSE	1		1
B16-F10	GSVANKFYV	9	P97855|G3BP1_MOUSE		1	1
B16-F10	GSVLNASTV	9	O08848|RO60_MOUSE		1	1
B16-F10	GSVTNVSVL	9	Q8CIQ7|DOCK3_MOUSE		1	1
B16-F10	GSVVNSVAL	9	P59326|YTHD1_MOUSE		1	1
B16-F10	GTLTDCVVMRD	11	Q8BG05|ROA3_MOUSE:P49312|ROA1_MOUSE	1		1
B16-F10	GVCTNIIHM	9	Q99LE6|ABCF2_MOUSE	1		1
B16-F10	GVIILYDHV	9	Q921M7|CYRIB_MOUSE		1	1
B16-F10	GVQVETISPGD	11	P26883|FKB1A_MOUSE	1		1
B16-F10	GVRNPQQHL	9	P29341|PABP1_MOUSE	1	1	2
B16-F10	GYEPPVQESV	10	P97351|RS3A_MOUSE	1	1	2
B16-F10	HAIENIDTF	9	P97929|BRCA2_MOUSE	1	1	2
B16-F10	HAIRNSFQYL	10	Q91XS1|MTMR4_MOUSE	1		1
B16-F10	HASSTFTITDQVP	13	Q60696|PMEL_MOUSE	1		1
B16-F10	HILANADAI	9	Q61333|TNAP2_MOUSE		1	1
B16-F10	HLVTNQEAL	9	Q8CFB4|GBP5_MOUSE	1		1
B16-F10	HQLQNFNTL	9	Q8BTM9-4|GRP4_MOUSE:Q8BTM9-3|GRP4_MOUSE:Q8BTM9|GRP4_MOUSE:Q8BTM9-2|GRP4_MOUSE:Q9Z1S3|GRP1_MOUSE		1	1
B16-F10	HQMQLVDSI	9	F6ZDS4|TPR_MOUSE	1	1	2
B16-F10	HSHLLKTPL	9	Q9CW46|RAVR1_MOUSE	1	1	2
B16-F10	HSLESSLIDIM	11	Q7TN98|CPEB4_MOUSE	1	1	2
B16-F10	HSLINPEVF	9	Q6ZQ08|CNOT1_MOUSE:Q6ZQ08-2|CNOT1_MOUSE:Q6ZQ08-4|CNOT1_MOUSE		1	1
B16-F10	HSVQNTEYF	9	O88700|BLM_MOUSE		1	1
B16-F10	IAIGNPVHL	9	Q9JJN2|ZFHX4_MOUSE		1	1
B16-F10	IALFNQELV	9	Q62141|SIN3B_MOUSE	1	1	2
B16-F10	IALHNIDSV	9	Q80X82|SYMPK_MOUSE		1	1
B16-F10	IALINALFL	9	Q8BHL5|ELMO2_MOUSE	1		1
B16-F10	IALLNSKAL	9	Q3T9E4|TGTP2_MOUSE:Q62293|TGTP1_MOUSE	1	1	2
B16-F10	IANINQELI	9	Q8BMI0|FBX38_MOUSE	1	1	2
B16-F10	IAPEDQVVL	9	P35545|UBIM_MOUSE	1		1
B16-F10	IAPSNQVIM	9	Q61398|PCOC1_MOUSE		1	1
B16-F10	IAVANAQEL	9	P62075|TIM13_MOUSE	1	1	2
B16-F10	IAVANAQELL	10	P62075|TIM13_MOUSE	1	1	2
B16-F10	IAVANATTM	9	Q3UA37|QRIC1_MOUSE		1	1
B16-F10	IAVQNNQQL	9	Q7TQK1|INT7_MOUSE	1	1	2
B16-F10	IDFSHQGP	8	P29812|TYRP2_MOUSE	1	1	2
B16-F10	IFIFHCAL	8	Q8JZZ7|AGRL2_MOUSE	1		1
B16-F10	IGFIKLD	7	P62274|RS29_MOUSE	1	1	2
B16-F10	IGIANFAEQI	10	Q9Z2X8|KEAP1_MOUSE		1	1
B16-F10	IGIENIHYL	9	Q9DB27|MCTS1_MOUSE:Q9CQ21|MCTS2_MOUSE	1	1	2
B16-F10	IGIQNFPEGL	10	Q8BWY7|S39AB_MOUSE	1		1
B16-F10	IGITNHDEYSL	11	P26039|TLN1_MOUSE		1	1
B16-F10	IGLGNLTLI	9	Q80SU7|GVIN1_MOUSE		1	1
B16-F10	IGLQNGVLL	9	Q921M3|SF3B3_MOUSE	1		1
B16-F10	IGPKNYEFL	9	Q8BHY8|SNX14_MOUSE	1	1	2
B16-F10	IGPNNGKNFF	10	Q8K203|NEIL3_MOUSE	1		1
B16-F10	IGVTAVAFNKELD	13	P97450|ATP5J_MOUSE	1	1	2
B16-F10	IIDAPALALA	10	B2RQC6-2|PYR1_MOUSE:B2RQC6|PYR1_MOUSE		1	1
B16-F10	IIFEEHTQSPIFVG	14	Q00897|A1AT4_MOUSE:P22599|A1AT2_MOUSE	1		1
B16-F10	IIGINGDYF	9	P11983|TCPA_MOUSE	1	1	2
B16-F10	IINENYDYL	9	Q6PFD9|NUP98_MOUSE	1	1	2
B16-F10	IIRSMPEQTGEK	12	P62889|RL30_MOUSE	1		1
B16-F10	IKAAFAPFGRISD	13	P52912|TIA1_MOUSE	1		1
B16-F10	IKNENQEVI	9	Q922S4|PDE2A_MOUSE		1	1
B16-F10	ILHTNLVYL	9	Q62280|SSXT_MOUSE	1		1
B16-F10	IMFETFNTPAM	11	P60710|ACTB_MOUSE:P63260|ACTG_MOUSE	1		1
B16-F10	IMVRNIDLV	9	P70280|VAMP7_MOUSE		1	1
B16-F10	INVPNAEVL	9	P70398|USP9X_MOUSE		1	1
B16-F10	IQAENAEFM	9	P14901|HMOX1_MOUSE		1	1
B16-F10	IQGILIEHL	9	Q91ZX7|LRP1_MOUSE	1	1	2
B16-F10	IQIANVTTL	9	Q9CU65|ZMYM2_MOUSE	1	1	2
B16-F10	IQKTPQIQVY	10	P01887|B2MG_MOUSE	1	1	2
B16-F10	IQLMNTAHL	9	Q9DC50|OCTC_MOUSE	1	1	2
B16-F10	IQLSNQEFL	9	E9Q309|CE350_MOUSE	1	1	2
B16-F10	IQLTHVQT	8	O08573|LEG9_MOUSE	1	1	2
B16-F10	IQPINHTTL	9	Q8CEF1|FEM1C_MOUSE		1	1
B16-F10	IQVKNEVSL	9	P51912|AAAT_MOUSE		1	1
B16-F10	IQVPNCDEI	9	Q8CIE6|COPA_MOUSE		1	1
B16-F10	IQVTNLISDSL	11	Q8BI71|EX3L1_MOUSE	1	1	2
B16-F10	ISGVNGTHI	9	O70551|SRPK1_MOUSE	1	1	2
B16-F10	ISGWNGDNM	9	P10126|EF1A1_MOUSE		1	1
B16-F10	ISIANSNAI	9	Q9QY24|ZBP1_MOUSE		1	1
B16-F10	ISIPGKDPDSP	11	Q99P91|GPNMB_MOUSE	1		1
B16-F10	ISLKNSQEI	9	Q80SU7|GVIN1_MOUSE	1	1	2
B16-F10	ISLLNAIDAL	10	O35177|CASL_MOUSE		1	1
B16-F10	ISPCNSPTAL	10	Q8CI11|GNL3_MOUSE		1	1
B16-F10	ISPENHISL	9	Q9WTX2|PRKRA_MOUSE		1	1
B16-F10	ISPFNFTAI	9	Q8CHT0|AL4A1_MOUSE	1	1	2
B16-F10	ISPKHFVHL	9	Q9JL60|GMEB1_MOUSE		1	1
B16-F10	ISPQNATHI	9	P97479|MYO7A_MOUSE	1	1	2
B16-F10	ISPQNMDIL	9	Q9QWR8|NAGAB_MOUSE	1	1	2
B16-F10	ISPSNCIYM	9	Q921X6|RPC6_MOUSE		1	1
B16-F10	ISPTHPGEGL	10	Q9JK38|GNA1_MOUSE	1	1	2
B16-F10	ISPVNPVAI	9	Q91WT8|RBM47_MOUSE	1	1	2
B16-F10	ITGTNAEVM	9	P15105|GLNA_MOUSE	1	1	2
B16-F10	ITLTSANHAMI	11	P16110|LEG3_MOUSE	1	1	2
B16-F10	IVGINLTEM	9	Q8BGF6|ELMD2_MOUSE	1	1	2
B16-F10	IVHEPGPVM	9	Q64267|XPA_MOUSE	1	1	2
B16-F10	IVSQVVYYL	9	Q2EG98-8|PK1L3_MOUSE:Q2EG98-2|PK1L3_MOUSE:Q2EG98|PK1L3_MOUSE:Q2EG98-3|PK1L3_MOUSE		1	1
B16-F10	IVYEKNCRNDL	11	Q99P91|GPNMB_MOUSE		1	1
B16-F10	KAILNGIDSI	10	Q9CW03|SMC3_MOUSE		1	1
B16-F10	KAIQNKDRAKVEF	13	Q9CY58|PAIRB_MOUSE	1	1	2
B16-F10	KAISNSHYVL	10	Q80XK6|ATG2B_MOUSE		1	1
B16-F10	KAIVNVIGM	9	Q99NB9|SF3B1_MOUSE	1	1	2
B16-F10	KALANVATV	9	P57716|NICA_MOUSE	1		1
B16-F10	KALGNEIVV	9	Q18PI6|SLAF5_MOUSE		1	1
B16-F10	KALINADE	8	P16546-2|SPTN1_MOUSE:P16546|SPTN1_MOUSE		1	1
B16-F10	KALINADEL	9	P16546|SPTN1_MOUSE	1	1	2
B16-F10	KALKLLDYV	9	B2RXC1|TPC11_MOUSE	1	1	2
B16-F10	KALTLLDYL	9	Q8CHU3-2|EPN2_MOUSE:Q8CHU3|EPN2_MOUSE		1	1
B16-F10	KAMENIGEL	9	Q569Z5-2|DDX46_MOUSE:Q569Z5|DDX46_MOUSE		1	1
B16-F10	KAPDNRETL	9	Q3TDQ1|STT3B_MOUSE	1	1	2
B16-F10	KAPHNVKQDFL	11	A2AWL7-3|MGAP_MOUSE		1	1
B16-F10	KAPQNLFLV	9	Q01338|ADA2A_MOUSE		1	1
B16-F10	KAPTNEFYA	9	O35988|SDC4_MOUSE	1	1	2
B16-F10	KAPTNVTCI	9	Q8CC88|VWA8_MOUSE:Q8CC88-2|VWA8_MOUSE		1	1
B16-F10	KAPVNTAEL	9	Q9CWI3|BCCIP_MOUSE	1	1	2
B16-F10	KATTNIVEM	9	Q8K1H7|T11L2_MOUSE		1	1
B16-F10	KAVANQTSATF	11	P62192|PRS4_MOUSE	1	1	2
B16-F10	KAVENSSTAI	10	O70435|PSA3_MOUSE	1	1	2
B16-F10	KAVENYLIQM	10	P56812|PDCD5_MOUSE		1	1
B16-F10	KDIGFIKLD	9	P62274|RS29_MOUSE	1	1	2
B16-F10	KDVPAFLQ	8	Q9WVJ2|PSD13_MOUSE		1	1
B16-F10	KFLASVSTVLTSKY	14	P01942|HBA_MOUSE		1	1
B16-F10	KGIGNKTEI	9	Q6P2L6-4|NSD3_MOUSE:Q6P2L6-2|NSD3_MOUSE:Q6P2L6|NSD3_MOUSE		1	1
B16-F10	KGPQNAFFL	9	P30051|TEAD1_MOUSE	1	1	2
B16-F10	KGPSNVFKI	9	Q9CZU3|MTREX_MOUSE		1	1
B16-F10	KGVFNVEVV	9	Q8R1A4-2|DOCK7_MOUSE:Q8R1A4|DOCK7_MOUSE		1	1
B16-F10	KGVNLPGA	8	P52480|KPYM_MOUSE:P52480-2|KPYM_MOUSE		1	1
B16-F10	KLAAVAVFFI	10	O08547|SC22B_MOUSE	1		1
B16-F10	KLLSHCLLVTL	11	P01942|HBA_MOUSE	1		1
B16-F10	KMIINEELM	9	Q8R1B4|EIF3C_MOUSE	1	1	2
B16-F10	KNLQTVNVDEN	11	P62900|RL31_MOUSE		1	1
B16-F10	KNLVNKEVM	9	P06745|G6PI_MOUSE	1	1	2
B16-F10	KNVPNLHVM	9	P63325|RS10_MOUSE		1	1
B16-F10	KPSGSEPTP	9	Q8BH59|CMC1_MOUSE		1	1
B16-F10	KQALNADYI	9	Q8C522|ENDD1_MOUSE		1	1
B16-F10	KQIENGVYL	9	Q4PJX1-2|ODR4_MOUSE:Q4PJX1|ODR4_MOUSE		1	1
B16-F10	KQILNIYDL	9	Q91W86|VPS11_MOUSE	1	1	2
B16-F10	KQLPLVKPYL	10	Q68FD5|CLH1_MOUSE	1		1
B16-F10	KQMLLFTHI	9	Q7TMY8|HUWE1_MOUSE	1		1
B16-F10	KQTINPILL	9	Q9CZW4|ACSL3_MOUSE		1	1
B16-F10	KSISNPPGSNL	11	P83741|WNK1_MOUSE	1	1	2
B16-F10	KSIVNQVFL	9	Q9DCN7|RNFT1_MOUSE	1	1	2
B16-F10	KSLENILTL	9	Q8K2I9|FBH1_MOUSE	1	1	2
B16-F10	KSLINKNEL	9	Q6NVF0|OCRL_MOUSE:Q6NVF0-2|OCRL_MOUSE		1	1
B16-F10	KSLKNFITI	9	Q9ER72|SYCC_MOUSE	1	1	2
B16-F10	KSLLLLTTL	9	Q9QYY7|ESM1_MOUSE	1	1	2
B16-F10	KSLLNHDLKL	10	Q3V3Q4|PYDC3_MOUSE		1	1
B16-F10	KSLVNKGTL	9	P43275|H11_MOUSE		1	1
B16-F10	KSLVSKGTL	9	P43274|H14_MOUSE:P43277|H13_MOUSE		1	1
B16-F10	KSPTAPPDLYF	11	Q9QXM0|ABHD2_MOUSE		1	1
B16-F10	KSTVNKWTL	9	Q8BH57-3|WDR48_MOUSE:Q8BH57-2|WDR48_MOUSE:Q8BH57|WDR48_MOUSE		1	1
B16-F10	KSVANLEYL	9	Q8CHG3|GCC2_MOUSE	1	1	2
B16-F10	KSVENFVSL	9	Q8C3J5|DOCK2_MOUSE	1	1	2
B16-F10	KSVINTTLV	9	O35114|SCRB2_MOUSE		1	1
B16-F10	KSYELPDGQVI	11	P60710|ACTB_MOUSE:P63260|ACTG_MOUSE:P68134|ACTS_MOUSE	1		1
B16-F10	KSYVNPTEL	9	Q8BQZ4|RLGPB_MOUSE		1	1
B16-F10	KTHINIVVI	9	P10126|EF1A1_MOUSE	1	1	2
B16-F10	KTIYNVEHL	9	Q9R1W3|RN103_MOUSE		1	1
B16-F10	KTLLNPEYL	9	Q80XQ2|TBCD5_MOUSE		1	1
B16-F10	KTVTNAVVTV	10	P63017|HSP7C_MOUSE	1		1
B16-F10	KTVVNKDVF	9	P61358|RL27_MOUSE	1	1	2
B16-F10	KVAVNDAHL	9	P16110|LEG3_MOUSE		1	1
B16-F10	KVESLQEEIAF	11	P20152|VIME_MOUSE	1		1
B16-F10	LAAACGGLAYF	11	Q91V24|ABCA7_MOUSE		1	1
B16-F10	LAIINPVEI	9	Q8BS90|BORA_MOUSE		1	1
B16-F10	LAIRNDEEL	9	P27661|H2AX_MOUSE:Q8CGP6|H2A1H_MOUSE:Q64523|H2A2C_MOUSE:Q8R1M2|H2AJ_MOUSE:C0HKE4|H2A1E_MOUSE:Q8BFU2|H2A3_MOUSE:C0HKE6|H2A1I_MOUSE:C0HKE8|H2A1O_MOUSE:C0HKE1|H2A1B_MOUSE:C0HKE5|H2A1G_MOUSE:Q8CGP7|H2A1K_MOUSE:C0HKE2|H2A1C_MOUSE:C0HKE7|H2A1N_MOUSE:Q6GSS7|H2A2A_MOUSE:C0HKE3|H2A1D_MOUSE:Q8CGP5|H2A1F_MOUSE:C0HKE9|H2A1P_MOUSE	1	1	2
B16-F10	LALENYITAL	10	P12023-2|A4_MOUSE:P12023|A4_MOUSE		1	1
B16-F10	LANHLIKV	8	Q9WVK4|EHD1_MOUSE:Q9QXY6|EHD3_MOUSE	1		1
B16-F10	LAPANTYTV	9	Q3UCQ1-2|FOXK2_MOUSE:Q3UCQ1|FOXK2_MOUSE		1	1
B16-F10	LAPTNLSSS	9	Q8BTI8-3|SRRM2_MOUSE:Q8BTI8-2|SRRM2_MOUSE:Q8BTI8|SRRM2_MOUSE		1	1
B16-F10	LASVSTVLTSKYR	13	P01942|HBA_MOUSE		1	1
B16-F10	LAVVNGQLM	9	Q8VCK5|KLH20_MOUSE	1	1	2
B16-F10	LDFGSLSNLQVTQP	14	P63276|RS17_MOUSE	1		1
B16-F10	LDGRVID	7	Q99020|ROAA_MOUSE	1		1
B16-F10	LFASLLATA	9	Q61207|SAP_MOUSE		1	1
B16-F10	LFRGFSFVAIT	11	P18654|KS6A3_MOUSE		1	1
B16-F10	LGLSNLTHL	9	Q9EQU3|TLR9_MOUSE		1	1
B16-F10	LGPENCATL	9	A6H8H2|DEN4C_MOUSE		1	1
B16-F10	LGPINQWWL	9	P13864|DNMT1_MOUSE	1	1	2
B16-F10	LGPKNGVYI	9	P36423|THAS_MOUSE		1	1
B16-F10	LGPPPPSFHL	10	Q8K310|MATR3_MOUSE	1		1
B16-F10	LGTGQESFGDVD	12	P07147|TYRP1_MOUSE		1	1
B16-F10	LGVTNFVHM	9	Q3USW5|FXRD2_MOUSE	1	1	2
B16-F10	LHDPSGYLAEADLS	14	Q60696|PMEL_MOUSE	1	1	2
B16-F10	LILQNTTVI	9	Q8CG46|SMC5_MOUSE	1		1
B16-F10	LKDYFSKFGEVVD	13	Q60668|HNRPD_MOUSE	1		1
B16-F10	LKDYFTKFGEVVD	13	Q99020|ROAA_MOUSE	1		1
B16-F10	LMAYMASKE	9	P16858|G3P_MOUSE	1	1	2
B16-F10	LPETFDAREQ	10	P10605|CATB_MOUSE		1	1
B16-F10	LPKAVVKLD	9	P08508|FCGR3_MOUSE		1	1
B16-F10	LQLLNTDYL	9	Q9R0L6|PCM1_MOUSE	1	1	2
B16-F10	LQVQNPQAQTI	11	O89090-2|SP1_MOUSE:O89090|SP1_MOUSE		1	1
B16-F10	LRVAPEEHPVLL	12	P60710|ACTB_MOUSE:P63260|ACTG_MOUSE	1		1
B16-F10	LSDEIFLRD	9	Q99P91|GPNMB_MOUSE	1		1
B16-F10	LSDVELDDLEKDEL	14	Q922R8|PDIA6_MOUSE	1		1
B16-F10	LSHVNEEWL	9	O70145|NCF2_MOUSE		1	1
B16-F10	LSIHNGPSV	9	Q6ZPY5|ZN507_MOUSE		1	1
B16-F10	LSILNSNEHL	10	Q8BMK0|CEP85_MOUSE	1	1	2
B16-F10	LSLENGTHTL	10	P13864|DNMT1_MOUSE		1	1
B16-F10	LSLENIATL	9	Q99K43|PRC1_MOUSE	1	1	2
B16-F10	LSLGIGFFAL	10	Q9CPZ3-2|CA185_MOUSE		1	1
B16-F10	LSLPNTDYI	9	Q9WTX2|PRKRA_MOUSE	1	1	2
B16-F10	LSMRNTSVM	9	O55003|BNIP3_MOUSE		1	1
B16-F10	LSNINSVFL	9	Q9Z0M6|CD97_MOUSE	1	1	2
B16-F10	LSPANGEQI	9	Q9QXV3|ING1_MOUSE		1	1
B16-F10	LSPINHNTL	9	Q6QI06|RICTR_MOUSE	1	1	2
B16-F10	LSPINIQLL	9	Q8C456|FRITZ_MOUSE	1	1	2
B16-F10	LSVRNGATL	9	Q8VHJ7|PRGC2_MOUSE:Q8VHJ7-2|PRGC2_MOUSE		1	1
B16-F10	LSVWNQQVL	9	A2ABV5|MED14_MOUSE	1	1	2
B16-F10	LVGSNITF	8	Q99P91|GPNMB_MOUSE	1		1
B16-F10	LVGSNITFVVN	11	Q99P91|GPNMB_MOUSE	1		1
B16-F10	LVIFNQEVI	9	Q60520|SIN3A_MOUSE	1	1	2
B16-F10	LVVENVDVL	9	P28660|NCKP1_MOUSE	1		1
B16-F10	LYIDRPLPYL	10	Q6PGL7|WASC2_MOUSE	1		1
B16-F10	MAPENKVADWL	11	Q6A065|CE170_MOUSE	1		1
B16-F10	MAPQNLSTF	9	Q99KV1|DJB11_MOUSE	1	1	2
B16-F10	MAPQNLSTFCL	11	Q99KV1|DJB11_MOUSE	1		1
B16-F10	MDAIKKKMQMLKLD	14	P58774|TPM2_MOUSE:P58771|TPM1_MOUSE	1		1
B16-F10	MDASLEKIAD	10	Q99K01|PDXD1_MOUSE	1		1
B16-F10	MDGIVPDIAVGTK	13	P17225|PTBP1_MOUSE	1		1
B16-F10	MEVKPPPGRPQPD	13	Q8BG05|ROA3_MOUSE	1		1
B16-F10	MFGGSGTSSRP	11	P20152|VIME_MOUSE	1	1	2
B16-F10	MFRIEGLAPKLD	12	B1AXP6|TOM5_MOUSE	1		1
B16-F10	MGESDDSILRLA	12	Q9CQR2|RS21_MOUSE	1		1
B16-F10	MGFGLFD	7	P99027|RLA2_MOUSE	1		1
B16-F10	MGIENICEL	9	Q60632|COT1_MOUSE	1		1
B16-F10	MGPLGLDHM	9	Q9D0E1|HNRPM_MOUSE	1	1	2
B16-F10	MKIFVGNVD	9	Q8C2Q3|RBM14_MOUSE	1		1
B16-F10	MKLYSLSVLYKGD	13	Q9CQW1|YKT6_MOUSE	1		1
B16-F10	MKTILSNQTVD	11	P51410|RL9_MOUSE		1	1
B16-F10	MLFETFNTPAM	11	Q9QY84|ACL7A_MOUSE		1	1
B16-F10	MMPTPVILLKEGTD	14	P80313|TCPH_MOUSE	1		1
B16-F10	MNAANVGWNGSTFA	14	P34884|MIF_MOUSE	1		1
B16-F10	MQIFVKTLTG	10	P62983|RS27A_MOUSE:P62984|RL40_MOUSE:P0CG49|UBB_MOUSE:P0CG50|UBC_MOUSE	1		1
B16-F10	MSIENQEEL	9	Q6RT24|CENPE_MOUSE		1	1
B16-F10	MSMTNATFI	9	Q920I9|WDR7_MOUSE	1		1
B16-F10	NAIANASTL	9	P57784|RU2A_MOUSE	1	1	2
B16-F10	NAIINTLAV	9	Q922V4|PLRG1_MOUSE	1	1	2
B16-F10	NAIVNTSEM	9	A2AQ14|MS18B_MOUSE		1	1
B16-F10	NALLNSENL	9	Q4QY64|ATAD5_MOUSE		1	1
B16-F10	NALNDITSL	9	P58774|TPM2_MOUSE	1		1
B16-F10	NAPINCVCL	9	Q9DCJ1|LST8_MOUSE		1	1
B16-F10	NAPPSNPVAM	10	Q80UV9-3|TAF1_MOUSE:Q80UV9|TAF1_MOUSE		1	1
B16-F10	NAPQNPESKL	10	Q9DB00|GON4L_MOUSE	1	1	2
B16-F10	NAVGNPEYL	9	Q01279|EGFR_MOUSE		1	1
B16-F10	NAVLNQRYL	9	Q5U465|CC125_MOUSE:Q5U465-2|CC125_MOUSE		1	1
B16-F10	NAVRNLQEL	9	Q6IQY5-2|CEP70_MOUSE:Q6IQY5|CEP70_MOUSE		1	1
B16-F10	NFGGSRNMGGP	11	O88569|ROA2_MOUSE	1		1
B16-F10	NFRVEAAR	8	P54818|GALC_MOUSE	1		1
B16-F10	NGPQNIYNL	9	Q8K3C0|RNK_MOUSE		1	1
B16-F10	NGVINAAFM	9	Q7M6Y3|PICAL_MOUSE:Q61548|AP180_MOUSE	1	1	2
B16-F10	NGVINGAEL	9	Q6DIC0|SMCA2_MOUSE		1	1
B16-F10	NITLLQSVSN	10	P62305|RUXE_MOUSE	1		1
B16-F10	NKELDPVQKLFVD	13	P97450|ATP5J_MOUSE	1	1	2
B16-F10	NLLENWDTL	9	Q00623|APOA1_MOUSE		1	1
B16-F10	NLLTNKTVM	9	Q9R111|GUAD_MOUSE		1	1
B16-F10	NLSKEDDVRQY	11	P62754|RS6_MOUSE		1	1
B16-F10	NLVRVWQVTIGTR	13	P68040|RACK1_MOUSE	1		1
B16-F10	NMPWNVDTL	9	Q61081|CDC37_MOUSE	1	1	2
B16-F10	NNQSSNFGP	9	P49312|ROA1_MOUSE		1	1
B16-F10	NQAIKALLQ	9	P62774|MTPN_MOUSE		1	1
B16-F10	NQLKNTSTI	9	P54823|DDX6_MOUSE		1	1
B16-F10	NQLSNHISSLF	11	Q00612|G6PD1_MOUSE:P97324|G6PD2_MOUSE	1		1
B16-F10	NQPAGVTSI	9	Q80YT7-2|MYOME_MOUSE:Q80YT7|MYOME_MOUSE		1	1
B16-F10	NQQPSNYGP	9	O88569|ROA2_MOUSE	1		1
B16-F10	NQVKNIAEL	9	Q9QZD4|XPF_MOUSE		1	1
B16-F10	NSIKNGILYL	10	Q62077|PLCG1_MOUSE	1	1	2
B16-F10	NSIRNLD	7	P28658|ATX10_MOUSE	1	1	2
B16-F10	NSIRNLDTI	9	P28658|ATX10_MOUSE	1	1	2
B16-F10	NSLLNNMEL	9	Q9QXX4|CMC2_MOUSE	1	1	2
B16-F10	NSLTNIQWL	9	O08696|FOXM1_MOUSE		1	1
B16-F10	NSLVNICLI	9	Q8BUH7|RNF26_MOUSE	1		1
B16-F10	NSMVLFDHM	9	Q64511|TOP2B_MOUSE	1	1	2
B16-F10	NSMVLFDHV	9	Q01320|TOP2A_MOUSE	1	1	2
B16-F10	NSPRNLAMEATYI	13	O70194|EIF3D_MOUSE	1		1
B16-F10	NSQVNFDFI	9	Q60695|RGL1_MOUSE	1	1	2
B16-F10	NSVINVSNL	9	Q9Z0Z3|SKP2_MOUSE	1	1	2
B16-F10	NSVVNPNKATI	11	Q3U2S4|OTUD5_MOUSE	1	1	2
B16-F10	NTVLNTCTI	9	Q6DFV6|FN3C1_MOUSE		1	1
B16-F10	NVEIDPEIQ	9	Q8VED5|K2C79_MOUSE		1	1
B16-F10	NVELDPEIQ	9	Q6IME9|K2C72_MOUSE		1	1
B16-F10	NVGPLIIKKKET	12	Q91WS0|CISD1_MOUSE	1		1
B16-F10	PALPLDQLQITHKD	14	Q91WR3|ASCC2_MOUSE	1		1
B16-F10	PASKRYEVPLETPR	14	P70699|LYAG_MOUSE	1	1	2
B16-F10	PAYHSSLMD	9	Q9JM76|ARPC3_MOUSE	1	1	2
B16-F10	PEAFPALA	8	Q9CY58|PAIRB_MOUSE	1	1	2
B16-F10	PEDVITGAFKVLD	13	P97457|MLRS_MOUSE	1		1
B16-F10	PEFLEDPSVLTKD	13	Q61033|LAP2A_MOUSE:Q61029|LAP2B_MOUSE	1		1
B16-F10	PEKLGQGGVQ	10	P01027|CO3_MOUSE	1		1
B16-F10	PETEQVNGLF	10	Q922D8|C1TC_MOUSE		1	1
B16-F10	PFIAIHAESKI	11	P00687|AMY1_MOUSE	1		1
B16-F10	PGVPLEDAPAPAGS	14	Q8CIV2-2|MBRL_MOUSE:Q8CIV2|MBRL_MOUSE		1	1
B16-F10	PILYRPVAVALD	12	P52480|KPYM_MOUSE	1	1	2
B16-F10	PIVINHVISVD	11	Q99JR8|SMRD2_MOUSE	1		1
B16-F10	PKAVVKLD	8	P08508|FCGR3_MOUSE		1	1
B16-F10	PKEEEEEELVD	11	P99028|QCR6_MOUSE	1	1	2
B16-F10	PKFEVIDKPQS	11	P97450|ATP5J_MOUSE	1	1	2
B16-F10	PLDRALAE	8	P13020|GELS_MOUSE	1		1
B16-F10	PLDRALAEL	9	P13020|GELS_MOUSE	1		1
B16-F10	PLDRALAELA	10	P13020|GELS_MOUSE	1		1
B16-F10	PLDRALAELAA	11	P13020|GELS_MOUSE	1		1
B16-F10	PLDSTSRIMD	10	P56480|ATPB_MOUSE	1	1	2
B16-F10	PLGPSLDWLKNL	12	Q9CQ91|NDUA3_MOUSE	1	1	2
B16-F10	PLLQDKPRTL	10	Q99P91|GPNMB_MOUSE		1	1
B16-F10	PLLQLLQKAQQERN	14	Q9DAR7|DCPS_MOUSE	1	1	2
B16-F10	PPASVVVGPVVVPR	14	P29699|FETUA_MOUSE	1	1	2
B16-F10	PPSAKAAID	9	P56959|FUS_MOUSE	1		1
B16-F10	PPSAKAAIDWF	11	P56959|FUS_MOUSE	1		1
B16-F10	PPSAKAAIDWFD	12	P56959|FUS_MOUSE	1		1
B16-F10	PPTAKAAVEWFD	12	Q61545|EWS_MOUSE	1		1
B16-F10	PRANPSAFL	9	Q9CQ88|TSN31_MOUSE:Q9D8C2|TSN13_MOUSE	1		1
B16-F10	PRKIEEIKDF	10	Q9JJI8|RL38_MOUSE		1	1
B16-F10	PRKIEEIKDFL	11	Q9JJI8|RL38_MOUSE	1		1
B16-F10	PRKIEEIKDFLLTA	14	Q9JJI8|RL38_MOUSE	1	1	2
B16-F10	PRPPPKPM	8	P62855|RS26_MOUSE	1	1	2
B16-F10	PRSPDAAGATIL	12	Q99JP7|GGT7_MOUSE		1	1
B16-F10	PRVLLLDL	8	Q9D2G2|ODO2_MOUSE	1	1	2
B16-F10	PSKIQLPEDD	10	O09111|NDUBB_MOUSE	1	1	2
B16-F10	PSNIFGNRNLL	11	Q8C0I1|ADAS_MOUSE	1	1	2
B16-F10	PTANLQTKEFNF	12	O35344|IMA4_MOUSE	1		1
B16-F10	PTEEESPV	8	P53986|MOT1_MOUSE	1		1
B16-F10	PTKETIEQEKRSE	13	Q6ZWY8|TYB10_MOUSE		1	1
B16-F10	PTQLPVGENGIV	12	Q9WVQ5|MTNB_MOUSE	1	1	2
B16-F10	PVFDNLMQQKLVDK	14	P18242|CATD_MOUSE	1		1
B16-F10	PVPEEEEGFEGGD	13	Q9QXS6|DREB_MOUSE	1		1
B16-F10	PVYRMVD	7	Q922Q1|MARC2_MOUSE	1		1
B16-F10	PYLVVNPNYLLED	13	P97311|MCM6_MOUSE	1	1	2
B16-F10	QAIKNGQAL	9	Q9QXZ0|MACF1_MOUSE	1	1	2
B16-F10	QAPQNKITV	9	P06151|LDHA_MOUSE	1	1	2
B16-F10	QAVHNGTYI	9	Q3TEW6-2|MPZL1_MOUSE:Q3TEW6|MPZL1_MOUSE		1	1
B16-F10	QCLLNVEHL	9	Q78PY7|SND1_MOUSE	1	1	2
B16-F10	QGIKNSVTL	9	Q6IRU7|CEP78_MOUSE		1	1
B16-F10	QIPVFVTMSQKN	12	Q99P91|GPNMB_MOUSE	1		1
B16-F10	QIVNPHLL	8	P07742|RIR1_MOUSE	1		1
B16-F10	QKEHRLDGRVID	12	Q99020|ROAA_MOUSE	1		1
B16-F10	QKVKNTEYL	9	Q8BHY8|SNX14_MOUSE	1	1	2
B16-F10	QPGPPGFPT	9	P02463|CO4A1_MOUSE		1	1
B16-F10	QQGFTAT	7	Q80UV9-3|TAF1_MOUSE:Q80UV9|TAF1_MOUSE		1	1
B16-F10	QQPSNYGPM	9	O88569|ROA2_MOUSE	1	1	2
B16-F10	QSLPPGLAVKDLK	13	Q9JJI8|RL38_MOUSE	1	1	2
B16-F10	QSLTNILHL	9	Q7TMR0|PCP_MOUSE	1	1	2
B16-F10	QSLVNLRELYL	11	Q3UM45|PP1R7_MOUSE	1		1
B16-F10	QTVENVEHL	9	Q91V83|TTI1_MOUSE	1	1	2
B16-F10	QVAMGKAH	8	Q7TPH6-2|MYCB2_MOUSE:Q7TPH6|MYCB2_MOUSE		1	1
B16-F10	QVINETSQHHDDLE	14	P20152|VIME_MOUSE		1	1
B16-F10	QVPFSVSVSQLQ	12	Q60696|PMEL_MOUSE	1		1
B16-F10	QVSLRVIND	9	Q60696|PMEL_MOUSE	1		1
B16-F10	RAIENIDTL	9	Q3UM45|PP1R7_MOUSE		1	1
B16-F10	RAIKNDSVV	9	P80313|TCPH_MOUSE	1	1	2
B16-F10	RAILNDTKL	9	O35551-2|RABE1_MOUSE:O35551-3|RABE1_MOUSE:O35551|RABE1_MOUSE:O35551-6|RABE1_MOUSE		1	1
B16-F10	RAILNYIAT	9	P10648|GSTA2_MOUSE	1		1
B16-F10	RAIPNNQVL	9	Q9JMG1|EDF1_MOUSE	1	1	2
B16-F10	RAIYNNMKQFI	11	Q8R429|AT2A1_MOUSE:O55143|AT2A2_MOUSE:Q64518|AT2A3_MOUSE	1		1
B16-F10	RALELGTVM	9	Q8CIH5|PLCG2_MOUSE		1	1
B16-F10	RALELLNYL	9	O35286|DHX15_MOUSE	1	1	2
B16-F10	RALENPDTASL	11	Q6PB44|PTN23_MOUSE		1	1
B16-F10	RALKNFSSL	9	Q03385|GNDS_MOUSE		1	1
B16-F10	RALLLSTYI	9	P17427|AP2A2_MOUSE:P17426-2|AP2A1_MOUSE:P17426|AP2A1_MOUSE		1	1
B16-F10	RALQLLDEV	9	P97471|SMAD4_MOUSE	1	1	2
B16-F10	RALSNLESI	9	Q8R317-2|UBQL1_MOUSE		1	1
B16-F10	RALVSVVSL	9	P18761|CAH6_MOUSE	1	1	2
B16-F10	RAPEGDDFL	9	Q5U4C3|SFR19_MOUSE		1	1
B16-F10	RAPTGSTEL	9	A2ACJ2|FP100_MOUSE	1	1	2
B16-F10	RAPTGYDVV	9	Q6KAU4|MB12B_MOUSE	1	1	2
B16-F10	RAVQNHNTYM	10	Q61549|AGRE1_MOUSE	1	1	2
B16-F10	REATESFASDPIL	13	P52480|KPYM_MOUSE	1		1
B16-F10	REDAAPATLEL	11	B0V2N1|PTPRS_MOUSE	1		1
B16-F10	RETNLESLPLVDT	13	P20152|VIME_MOUSE	1		1
B16-F10	RGGQVSLRVIND	12	Q60696|PMEL_MOUSE		1	1
B16-F10	RGIVNLSEL	9	Q33DR3|DLP1_MOUSE	1		1
B16-F10	RGLENLTLL	9	Q6R5N8|TLR13_MOUSE	1	1	2
B16-F10	RGPENLLDHQM	11	Q91ZV0|MIA2_MOUSE		1	1
B16-F10	RGPSNAFFL	9	Q62296|TEAD4_MOUSE	1		1
B16-F10	RGPVNLQHL	9	Q80XU8|LRFN4_MOUSE		1	1
B16-F10	RILAHLTGTEF	11	Q3TJD7|PDLI7_MOUSE	1		1
B16-F10	RINEILSNALK	11	Q9D0E1|HNRPM_MOUSE	1		1
B16-F10	RISNLIVL	8	P97311|MCM6_MOUSE		1	1
B16-F10	RIVENVNVI	9	P58252|EF2_MOUSE		1	1
B16-F10	RLITLADHI	9	Q60974|NCOR1_MOUSE	1		1
B16-F10	RLITNSEEI	9	P55096|ABCD3_MOUSE		1	1
B16-F10	RLITNSEEIAF	11	P55096|ABCD3_MOUSE		1	1
B16-F10	RLSTPAGVQVILR	13	Q99N91|RM34_MOUSE	1		1
B16-F10	RMFGGSGTSSRP	12	P20152|VIME_MOUSE	1		1
B16-F10	RMGPLGLDHM	10	Q9D0E1|HNRPM_MOUSE	1		1
B16-F10	RMPEKVTWM	9	P84099|RL19_MOUSE	1		1
B16-F10	RQAENGMYI	9	B2RQC6-2|PYR1_MOUSE:B2RQC6|PYR1_MOUSE		1	1
B16-F10	RQFLNRDDI	9	Q9D1K2|VATF_MOUSE		1	1
B16-F10	RQFPNRDAL	9	Q91YE7-2|RBM5_MOUSE:Q91YE7|RBM5_MOUSE		1	1
B16-F10	RQGANINEI	9	P60335|PCBP1_MOUSE	1	1	2
B16-F10	RQILNADAM	9	A2AIV2|VIR_MOUSE	1	1	2
B16-F10	RQLENGTTL	9	Q3TZZ7|ESYT2_MOUSE	1	1	2
B16-F10	RQPSIELPSM	10	P19973|LSP1_MOUSE	1	1	2
B16-F10	RQVQNTAITL	10	Q69ZX6|MOR2A_MOUSE		1	1
B16-F10	RQWANLMEKI	10	P08226|APOE_MOUSE		1	1
B16-F10	RQYNMVPFWPPV	12	P07147|TYRP1_MOUSE	1	1	2
B16-F10	RSIKNVTEL	9	Q99K95|RTF2_MOUSE		1	1
B16-F10	RSIQNAQFL	9	P24638|PPAL_MOUSE		1	1
B16-F10	RSLDNGGYYI	10	P25911-2|LYN_MOUSE:P16277|BLK_MOUSE:P25911|LYN_MOUSE		1	1
B16-F10	RSLGNDVKSYL	11	Q9CYI0|NJMU_MOUSE		1	1
B16-F10	RSLLLLAPL	9	Q9R0E2|PLOD1_MOUSE	1	1	2
B16-F10	RSLLNSHIL	9	Q6VNB8|WDFY3_MOUSE	1	1	2
B16-F10	RSLLNWRTKL	10	Q9DBE9|SPB1_MOUSE	1		1
B16-F10	RSMQNYVQFL	10	A3KGV1|ODFP2_MOUSE	1		1
B16-F10	RSPENPPSKEL	11	Q9CQA0|CENPM_MOUSE	1	1	2
B16-F10	RSPENVIETI	10	E9PVA8|GCN1_MOUSE	1		1
B16-F10	RSPGNSPTPM	10	Q8CI61|BAG4_MOUSE	1		1
B16-F10	RTVENVTVF	9	Q62465|VAT1_MOUSE	1	1	2
B16-F10	RVFQNEVLGTL	11	Q8CHW4|EI2BE_MOUSE	1		1
B16-F10	RVGQTIERMGSGVE	14	Q9D0E1|HNRPM_MOUSE	1		1
B16-F10	RVIDPKKAMAMKKD	14	Q99020|ROAA_MOUSE	1		1
B16-F10	RVLITTDLL	9	P60843|IF4A1_MOUSE:P10630|IF4A2_MOUSE	1		1
B16-F10	RVLTQTANGTLQ	12	Q3U1N2-2|SRBP2_MOUSE:Q3U1N2|SRBP2_MOUSE		1	1
B16-F10	RVPINETFI	9	Q8C2E7|WASC5_MOUSE	1		1
B16-F10	RVPTPNVSVVDLT	13	P16858|G3P_MOUSE	1		1
B16-F10	RVQAVLTSDSPA	12	Q99P91|GPNMB_MOUSE	1	1	2
B16-F10	RYFDSFGDLSSASA	14	P02088|HBB1_MOUSE	1		1
B16-F10	SAAFNQLPHL	10	Q7TN98|CPEB4_MOUSE	1	1	2
B16-F10	SAALNKDFL	9	E9Q309|CE350_MOUSE		1	1
B16-F10	SAGTSLVNF	9	P09813|APOA2_MOUSE	1	1	2
B16-F10	SAHQNYAEWL	10	Q99PL5|RRBP1_MOUSE	1	1	2
B16-F10	SAIANIPAAAV	11	P97480-2|EYA3_MOUSE:P97480|EYA3_MOUSE		1	1
B16-F10	SAIENMAEKL	10	P14404|EVI1_MOUSE	1	1	2
B16-F10	SAIFNFQSL	9	Q9CR64|KISHA_MOUSE	1	1	2
B16-F10	SAIFNFQSLL	10	Q9CR64|KISHA_MOUSE	1	1	2
B16-F10	SAIFNNVMTL	10	Q9JIM1|S29A1_MOUSE	1	1	2
B16-F10	SAIHNFYDNI	10	Q99K90|TAB2_MOUSE	1	1	2
B16-F10	SAIIDSDNV	9	Q8BPY9|FIGL1_MOUSE	1	1	2
B16-F10	SAIINEDNL	9	Q8BG67|EFR3A_MOUSE	1	1	2
B16-F10	SAIINLFHL	9	Q80YV3|TRRAP_MOUSE		1	1
B16-F10	SAIINLFHLI	10	Q80YV3|TRRAP_MOUSE	1		1
B16-F10	SAILDHPPSPM	11	Q8K4J6-2|MKL1_MOUSE:Q8K4J6|MKL1_MOUSE		1	1
B16-F10	SAILNEWTL	9	Q7TSI1|PKHM1_MOUSE	1	1	2
B16-F10	SAILNGRNLL	10	Q8VHY0|CSPG4_MOUSE	1		1
B16-F10	SAILSDPESHI	11	Q8VI84|NOC3L_MOUSE		1	1
B16-F10	SAIMNPASKV	10	Q68FD5|CLH1_MOUSE	1	1	2
B16-F10	SAIMNPASKVI	11	Q68FD5|CLH1_MOUSE	1	1	2
B16-F10	SAIMNPASKVIAL	13	Q68FD5|CLH1_MOUSE	1		1
B16-F10	SAIQNGSSGGNHL	13	P58462-2|FOXP1_MOUSE:P58462|FOXP1_MOUSE:P58462-5|FOXP1_MOUSE		1	1
B16-F10	SAIQNLHSFD	10	P48024|EIF1_MOUSE	1	1	2
B16-F10	SAIQNLHSFDP	11	P48024|EIF1_MOUSE	1		1
B16-F10	SAIQNLHSFDPFAD	14	P48024|EIF1_MOUSE	1	1	2
B16-F10	SAIRGQAEV	9	P59598|ASXL1_MOUSE	1	1	2
B16-F10	SAISNLDYI	9	Q9R0C8|VAV3_MOUSE	1		1
B16-F10	SAIVNLPGCSA	11	Q9QZE5|COPG1_MOUSE	1	1	2
B16-F10	SALAASALPAL	11	Q9D8E6|RL4_MOUSE	1		1
B16-F10	SALANYIHL	9	Q8BPS4|GP180_MOUSE	1	1	2
B16-F10	SALDNGPQI	9	Q8C863|ITCH_MOUSE	1	1	2
B16-F10	SALENAENHV	10	Q32P12|CQ053_MOUSE	1		1
B16-F10	SALENGRYEL	10	O88379|BAZ1A_MOUSE		1	1
B16-F10	SALENHPFTL	10	Q9JHI8|NOX4_MOUSE	1	1	2
B16-F10	SALGNVTTC	9	O55135|IF6_MOUSE	1	1	2
B16-F10	SALINLVEF	9	P97313|PRKDC_MOUSE	1	1	2
B16-F10	SALLLKDVL	9	Q8BZ36|RINT1_MOUSE	1	1	2
B16-F10	SALLNSIVKL	10	D3YXG0-2|HMCN1_MOUSE:D3YXG0|HMCN1_MOUSE		1	1
B16-F10	SALNNFQVV	9	Q9ER00|STX12_MOUSE	1	1	2
B16-F10	SALQLNHTA	9	Q91ZR2|SNX18_MOUSE		1	1
B16-F10	SALQNAESDRL	11	Q6RT24|CENPE_MOUSE	1	1	2
B16-F10	SALQNFASTF	10	Q3UGY8|BIG3_MOUSE	1	1	2
B16-F10	SALRMADVI	9	Q8BZS9|DHX32_MOUSE	1	1	2
B16-F10	SALRRSGYGPSD	12	Q8CI61|BAG4_MOUSE	1		1
B16-F10	SALSNEETV	9	Q8K4E0|ALMS1_MOUSE:Q8K4E0-2|ALMS1_MOUSE		1	1
B16-F10	SALTNCITQL	10	Q8BI84|TGO1_MOUSE	1		1
B16-F10	SALVGAAVI	9	P70170|ABCC9_MOUSE	1		1
B16-F10	SALVHLEVL	9	Q3ULM6|USPL1_MOUSE	1	1	2
B16-F10	SALVKEEYL	9	Q91ZU6|DYST_MOUSE:Q91ZU6-3|DYST_MOUSE:Q91ZU6-4|DYST_MOUSE:Q91ZU6-2|DYST_MOUSE		1	1
B16-F10	SALVSSLHL	9	Q9QZE5|COPG1_MOUSE	1	1	2
B16-F10	SAMELIWNL	9	Q8R480|NUP85_MOUSE		1	1
B16-F10	SANHNILQI	9	Q61656|DDX5_MOUSE	1		1
B16-F10	SAPANGILV	9	E9Q1P8|I2BP2_MOUSE		1	1
B16-F10	SAPANPSSNI	10	Q8CI08|SLAI2_MOUSE:Q8CI08-2|SLAI2_MOUSE		1	1
B16-F10	SAPAPSNSHL	10	Q3TC46|PATL1_MOUSE		1	1
B16-F10	SAPDNVLEV	9	Q69ZR2|HECD1_MOUSE		1	1
B16-F10	SAPENAVRM	9	O35127|C10_MOUSE	1	1	2
B16-F10	SAPFPAPDTI	10	Q8BGS1|E41L5_MOUSE	1	1	2
B16-F10	SAPINSVLL	9	Q8C4N4|LAAT1_MOUSE:Q9CX97|WDR55_MOUSE	1	1	2
B16-F10	SAPKGYTTF	9	Q9Z183|PADI4_MOUSE	1	1	2
B16-F10	SAPLGDFRHTL	11	Q9Z0X0|BORG3_MOUSE		1	1
B16-F10	SAPLGDFRHTM	11	Q9JM96|BORG4_MOUSE		1	1
B16-F10	SAPLPPSIFM	10	Q920E5|FPPS_MOUSE	1	1	2
B16-F10	SAPQSAVEL	9	Q99KN9|EPN4_MOUSE:Q99KN9-2|EPN4_MOUSE		1	1
B16-F10	SAPRDLFDM	9	P98083|SHC1_MOUSE	1	1	2
B16-F10	SAPRNFVENF	10	Q91WG4|ELP2_MOUSE	1	1	2
B16-F10	SAPSADAPM	9	P16858|G3P_MOUSE	1	1	2
B16-F10	SAPSADAPMFVM	12	P16858|G3P_MOUSE	1		1
B16-F10	SAPSNFEHRV	10	Q8BTW9|PAK4_MOUSE		1	1
B16-F10	SAPSNPWGGL	10	Q7TN99-6|CPEB3_MOUSE:Q7TN99-5|CPEB3_MOUSE:Q7TN99-4|CPEB3_MOUSE:Q7TN99-3|CPEB3_MOUSE:Q7TN99-2|CPEB3_MOUSE:Q7TN99|CPEB3_MOUSE		1	1
B16-F10	SAPSSPAEYI	10	Q6NZQ2|DDX31_MOUSE		1	1
B16-F10	SAPSSPDAL	9	Q9D842-2|APLF_MOUSE:Q9D842-3|APLF_MOUSE:Q9D842|APLF_MOUSE		1	1
B16-F10	SAPSSSSLSTL	11	Q9DBR7-2|MYPT1_MOUSE:Q9DBR7|MYPT1_MOUSE		1	1
B16-F10	SAPTARVFM	9	Q91YR7|PRP6_MOUSE		1	1
B16-F10	SAPTGSGKTL	10	Q8K301|DDX52_MOUSE	1		1
B16-F10	SAPTNTGSTGL	11	Q8BTS4|NUP54_MOUSE	1	1	2
B16-F10	SAPVAAEPF	9	Q60597-2|ODO1_MOUSE:Q60597|ODO1_MOUSE:Q60597-4|ODO1_MOUSE:Q60597-3|ODO1_MOUSE		1	1
B16-F10	SAPVAAEPFL	10	Q60597|ODO1_MOUSE	1		1
B16-F10	SAPVNFISA	9	Q9ERA6|TFP11_MOUSE	1		1
B16-F10	SAPVNGSVFI	10	Q91XF4|RN167_MOUSE		1	1
B16-F10	SAPVNKAEL	9	Q80YS6|AFAP1_MOUSE	1	1	2
B16-F10	SAPVNMTTYV	10	Q9R207|NBN_MOUSE		1	1
B16-F10	SAPYGRITL	9	Q5SQX6|CYFP2_MOUSE:Q7TMB8|CYFP1_MOUSE	1	1	2
B16-F10	SARNLEHL	8	Q8BMI0|FBX38_MOUSE	1		1
B16-F10	SATINAEFV	9	Q66K08|CILP1_MOUSE	1	1	2
B16-F10	SAVENILEHL	10	P58064|RT06_MOUSE	1	1	2
B16-F10	SAVENKQQI	9	P53351|PLK2_MOUSE	1	1	2
B16-F10	SAVENLNEM	9	Q80UM3|NAA15_MOUSE	1	1	2
B16-F10	SAVENVVKL	9	Q8VI78|PLA1A_MOUSE		1	1
B16-F10	SAVFNGSIL	9	P48754|BRCA1_MOUSE	1	1	2
B16-F10	SAVGNDTQL	9	P61406|EST1A_MOUSE		1	1
B16-F10	SAVISLEGKPL	11	P18760|COF1_MOUSE	1	1	2
B16-F10	SAVKNDYEM	9	Q8VEE4|RFA1_MOUSE	1	1	2
B16-F10	SAVKNLQQL	9	Q8VIJ8|NPRL3_MOUSE	1	1	2
B16-F10	SAVPNQISI	9	Q8C5D8-3|PIAS2_MOUSE:Q8C5D8-2|PIAS2_MOUSE:Q8C5D8-4|PIAS2_MOUSE:Q8C5D8-5|PIAS2_MOUSE:Q8C5D8|PIAS2_MOUSE		1	1
B16-F10	SAVQNVADV	9	Q9JHU4|DYHC1_MOUSE	1		1
B16-F10	SAVRNGLLLL	10	Q80TT8|CUL9_MOUSE	1		1
B16-F10	SAVSNNYIQTL	11	P30999|CTND1_MOUSE	1	1	2
B16-F10	SAVSNNYIQTLG	12	P30999-2|CTND1_MOUSE:P30999-3|CTND1_MOUSE:P30999|CTND1_MOUSE		1	1
B16-F10	SAVTDFDFI	9	Q9CUX1|P52K_MOUSE	1	1	2
B16-F10	SAVTNKAYVF	10	O35114|SCRB2_MOUSE		1	1
B16-F10	SAVTNSGVHL	10	Q9CY28|GTPB8_MOUSE	1	1	2
B16-F10	SAVVDKDFL	9	P55264|ADK_MOUSE	1	1	2
B16-F10	SAVVNKVPL	9	Q9DAM7|TM263_MOUSE		1	1
B16-F10	SAVVNKVPLSGK	12	Q9DAM7|TM263_MOUSE		1	1
B16-F10	SAYLNMFEHI	10	Q99N16|CP4F3_MOUSE	1		1
B16-F10	SCPANLPNI	9	Q08874-6|MITF_MOUSE:Q08874-5|MITF_MOUSE:Q08874-9|MITF_MOUSE:Q08874-3|MITF_MOUSE:Q08874-8|MITF_MOUSE:Q08874-7|MITF_MOUSE:Q08874-2|MITF_MOUSE:Q08874-4|MITF_MOUSE:Q08874|MITF_MOUSE		1	1
B16-F10	SDIIRSMPEQTGEK	14	P62889|RL30_MOUSE	1		1
B16-F10	SDILGKYVD	9	Q64433|CH10_MOUSE		1	1
B16-F10	SDYGNGFGGFGSY	13	Q9CX86|ROA0_MOUSE	1		1
B16-F10	SEEQFGGD	8	Q60668|HNRPD_MOUSE	1		1
B16-F10	SELITKA	7	P43274|H14_MOUSE:P15864|H12_MOUSE:P43277|H13_MOUSE	1		1
B16-F10	SFFEGEDFSETLTR	14	P20029|GRP78_MOUSE	1		1
B16-F10	SFLKIWN	7	P62874|GBB1_MOUSE		1	1
B16-F10	SFTDAIFDEWLK	12	P29812|TYRP2_MOUSE		1	1
B16-F10	SFTLELEED	9	P54818|GALC_MOUSE	1		1
B16-F10	SFTVNRPFL	9	Q61247|A2AP_MOUSE	1		1
B16-F10	SGALDVLQMKEED	13	P14206|RSSA_MOUSE	1		1
B16-F10	SGGGSGGYGSRRF	13	Q8BG05|ROA3_MOUSE	1		1
B16-F10	SGGGVIRGPAGNND	14	Q6PDM2|SRSF1_MOUSE	1	1	2
B16-F10	SGGSGGYGGRSRY	13	O88569|ROA2_MOUSE	1		1
B16-F10	SGIIDSDFL	9	Q9D8P7|TF3C6_MOUSE	1	1	2
B16-F10	SGIKNPVSV	9	Q8R1G1|TASP1_MOUSE	1	1	2
B16-F10	SGIRNISFM	9	O35598|ADA10_MOUSE	1	1	2
B16-F10	SGIRNQGGTCYL	12	Q8BWR4|UBP40_MOUSE	1		1
B16-F10	SGITNQMSI	9	Q01065|PDE1B_MOUSE		1	1
B16-F10	SGITNSASSTL	11	Q6A068|CDC5L_MOUSE	1	1	2
B16-F10	SGLCNEDHL	9	Q8CFI0|NED4L_MOUSE:P46935|NEDD4_MOUSE	1	1	2
B16-F10	SGLILLETI	9	Q8C419|GP158_MOUSE		1	1
B16-F10	SGLINHQRI	9	Q91VN1|ZNF24_MOUSE	1	1	2
B16-F10	SGLLNPYSL	9	Q6ZPV2|INO80_MOUSE	1	1	2
B16-F10	SGLLNQQSL	9	Q9DB40-2|MED27_MOUSE:Q9DB40|MED27_MOUSE		1	1
B16-F10	SGLLNSQAL	9	P19096|FAS_MOUSE	1	1	2
B16-F10	SGLLNVLEV	9	Q9R111|GUAD_MOUSE		1	1
B16-F10	SGLQNFEAL	9	Q99KD5|UN45A_MOUSE	1	1	2
B16-F10	SGLSGHTTL	9	P27546|MAP4_MOUSE	1	1	2
B16-F10	SGLTNRDTL	9	Q9EQJ9|MAGI3_MOUSE	1	1	2
B16-F10	SGLVNHVPL	9	P31230|AIMP1_MOUSE		1	1
B16-F10	SGNFGGSRNMGGP	13	O88569|ROA2_MOUSE	1	1	2
B16-F10	SGPINFTVF	9	P97457|MLRS_MOUSE	1	1	2
B16-F10	SGPINFTVFL	10	P97457|MLRS_MOUSE	1	1	2
B16-F10	SGPLDSTFI	9	Q9D818|SAPC2_MOUSE	1	1	2
B16-F10	SGPTNASAF	9	P27546|MAP4_MOUSE	1	1	2
B16-F10	SGPTNEDLYI	10	Q01237|HMDH_MOUSE	1	1	2
B16-F10	SGPTSLFAV	9	Q8VEK3|HNRPU_MOUSE	1	1	2
B16-F10	SGPVHISGQHL	11	Q61937|NPM_MOUSE	1		1
B16-F10	SGPWNRGFGQEV	12	Q6DID3|SCAF8_MOUSE	1		1
B16-F10	SGVFNVSEL	9	P97863|NFIB_MOUSE	1	1	2
B16-F10	SGVGFGGLEAM	11	Q8C854-3|MYEF2_MOUSE		1	1
B16-F10	SGVGNYISA	9	Q920Q6-2|MSI2H_MOUSE:Q920Q6|MSI2H_MOUSE		1	1
B16-F10	SGVSNPHVI	9	Q3TUF7|YETS2_MOUSE	1	1	2
B16-F10	SGVWNVTEL	9	P70257|NFIX_MOUSE	1	1	2
B16-F10	SGVYKKLTGKDVN	13	P62082|RS7_MOUSE		1	1
B16-F10	SHLLNTSTL	9	O88466|ZN106_MOUSE		1	1
B16-F10	SHVAVENALGLD	12	Q62167|DDX3X_MOUSE	1		1
B16-F10	SHVTNVAFL	9	Q7TNG5|EMAL2_MOUSE:Q7TNG5-2|EMAL2_MOUSE		1	1
B16-F10	SHVTNVDFL	9	Q05BC3|EMAL1_MOUSE	1	1	2
B16-F10	SIALHFPG	8	Q60696|PMEL_MOUSE	1		1
B16-F10	SIDVDRGFLSGP	12	Q8C854|MYEF2_MOUSE	1		1
B16-F10	SIFSGFLIFPSA	12	P98086|C1QA_MOUSE	1		1
B16-F10	SIHGTNPQYL	10	Q4FK66|PR38A_MOUSE		1	1
B16-F10	SILRIHAREIFD	12	P17182|ENOA_MOUSE	1		1
B16-F10	SILRLAKADGIVS	13	Q9CQR2|RS21_MOUSE	1		1
B16-F10	SILVNQEVL	9	P42228|STAT4_MOUSE	1	1	2
B16-F10	SIRNLDTI	8	P28658|ATX10_MOUSE		1	1
B16-F10	SIVFNGPHL	9	Q9CWR2|SMYD3_MOUSE	1	1	2
B16-F10	SKFDVSGYPTI	11	P08003|PDIA4_MOUSE	1	1	2
B16-F10	SKGPAVGID	9	P63017|HSP7C_MOUSE	1	1	2
B16-F10	SKLANIDYL	9	Q811L6|MAST4_MOUSE	1	1	2
B16-F10	SKVSFKITLTSD	12	P61961|UFM1_MOUSE	1		1
B16-F10	SLADAINTEFKNT	13	P20152|VIME_MOUSE	1		1
B16-F10	SLGINPHVL	9	Q6PFD9|NUP98_MOUSE	1	1	2
B16-F10	SLGKNPTDAYL	11	Q3THE2|ML12B_MOUSE		1	1
B16-F10	SLIILKQVM	9	Q9Z2U1|PSA5_MOUSE	1	1	2
B16-F10	SLISNGPSL	9	E9Q7E2|ARID2_MOUSE	1		1
B16-F10	SLITNKVVM	9	P23492|PNPH_MOUSE		1	1
B16-F10	SLITNSHADHL	11	O88491|NSD1_MOUSE		1	1
B16-F10	SLKIQTSNVTNKND	14	Q64012|RALY_MOUSE	1	1	2
B16-F10	SLLNKPKSEM	10	P62317|SMD2_MOUSE		1	1
B16-F10	SLLSNLDEI	9	Q9WU78|PDC6I_MOUSE	1	1	2
B16-F10	SLLTNHVTL	9	O88904|HIPK1_MOUSE	1	1	2
B16-F10	SLPTNLIHL	9	Q6WKZ8|UBR2_MOUSE	1	1	2
B16-F10	SLQNKLVI	8	Q9CQU5|ZWINT_MOUSE	1	1	2
B16-F10	SLREHFEKWGTLTD	14	Q8BG05|ROA3_MOUSE	1		1
B16-F10	SLRVINDGP	9	Q60696|PMEL_MOUSE	1		1
B16-F10	SLRVINDGPT	10	Q60696|PMEL_MOUSE	1		1
B16-F10	SLRVINDGPTLVG	13	Q60696|PMEL_MOUSE	1		1
B16-F10	SLRVINDGPTLVGA	14	Q60696|PMEL_MOUSE	1		1
B16-F10	SLSNKLTL	8	P09411|PGK1_MOUSE	1	1	2
B16-F10	SLSNKLTLD	9	P09411|PGK1_MOUSE	1	1	2
B16-F10	SLSNKLTLDKLD	12	P09411|PGK1_MOUSE	1	1	2
B16-F10	SLYDKKYLPHL	11	Q80VA5|S3TC2_MOUSE	1	1	2
B16-F10	SMAENSIPL	9	P58462-2|FOXP1_MOUSE:P58462|FOXP1_MOUSE:P58462-5|FOXP1_MOUSE		1	1
B16-F10	SMAEPKTVYWDRDM	14	P01887|B2MG_MOUSE		1	1
B16-F10	SMAGNIIPAI	10	Q9Z1F9|SAE2_MOUSE	1	1	2
B16-F10	SMEVNVDTL	9	Q9CRD4|DBND2_MOUSE		1	1
B16-F10	SMEVNVDVL	9	Q91WZ8-3|DTBP1_MOUSE:Q91WZ8-2|DTBP1_MOUSE:Q91WZ8|DTBP1_MOUSE		1	1
B16-F10	SMFDQTQIQEF	11	P97457|MLRS_MOUSE	1		1
B16-F10	SMGLSLVEM	9	P31938|MP2K1_MOUSE		1	1
B16-F10	SMGVNDIDI	9	Q3TIV5-2|ZC3HF_MOUSE:Q3TIV5|ZC3HF_MOUSE		1	1
B16-F10	SMLGNYDEM	9	Q9ESC8|AFF4_MOUSE	1		1
B16-F10	SMLINGYAL	9	P11983|TCPA_MOUSE	1	1	2
B16-F10	SMLQNPLGNVL	11	P70166|CPEB1_MOUSE	1	1	2
B16-F10	SMNSNIWQI	9	Q91V83|TTI1_MOUSE	1		1
B16-F10	SMNVNEIFM	9	Q9CQD1|RAB5A_MOUSE	1	1	2
B16-F10	SMPISEETL	9	P97432|NBR1_MOUSE		1	1
B16-F10	SMVLNSQSL	9	Q8BHL5-2|ELMO2_MOUSE:Q8BHL5|ELMO2_MOUSE:Q8BHL5-3|ELMO2_MOUSE		1	1
B16-F10	SMVQNRVFL	9	Q8C3J5|DOCK2_MOUSE	1	1	2
B16-F10	SNFGPMKGGNFGG	13	P49312|ROA1_MOUSE		1	1
B16-F10	SNLVNENTL	9	Q8K363|DDX18_MOUSE		1	1
B16-F10	SNLYNHPQLI	10	Q6NSQ7|LTV1_MOUSE	1		1
B16-F10	SNYGPMKGGSFGG	13	Q8BG05|ROA3_MOUSE	1		1
B16-F10	SNYGPMKSGNFGGS	14	O88569|ROA2_MOUSE	1		1
B16-F10	SNYLFTKL	8	P97481|EPAS1_MOUSE	1	1	2
B16-F10	SPGGAYVTR	9	P20152|VIME_MOUSE	1		1
B16-F10	SPVGRVTP	8	P56393|COX7B_MOUSE	1	1	2
B16-F10	SQALNTTVL	9	Q99NH8|TREM2_MOUSE:Q99NH8-2|TREM2_MOUSE		1	1
B16-F10	SQFGEMGGKFM	11	Q62448|IF4G2_MOUSE	1		1
B16-F10	SQGMNVTNM	9	B2RWS6|EP300_MOUSE	1		1
B16-F10	SQGPQIPTI	9	Q8BR07-4|BICD1_MOUSE		1	1
B16-F10	SQHQSSYGPM	10	Q9CX86|ROA0_MOUSE	1	1	2
B16-F10	SQHVNLDQL	9	Q8CDJ3|BAKOR_MOUSE		1	1
B16-F10	SQIGNLEAL	9	Q8BVU0|LRCH3_MOUSE	1		1
B16-F10	SQISNTEFL	9	Q3TCJ1|ABRX2_MOUSE	1	1	2
B16-F10	SQITSLVTL	9	Q9WUV0|ORC5_MOUSE		1	1
B16-F10	SQIVNPESI	9	Q8R3K3|PTCD2_MOUSE		1	1
B16-F10	SQLEKTFAM	9	P59438-2|HPS5_MOUSE:P59438|HPS5_MOUSE		1	1
B16-F10	SQLELKSLI	9	Q61532|MK06_MOUSE	1	1	2
B16-F10	SQLENKTII	9	A2AKX3-2|SETX_MOUSE:A2AKX3|SETX_MOUSE		1	1
B16-F10	SQLIDTHLL	9	Q3TLH4|PRC2C_MOUSE	1	1	2
B16-F10	SQLIILDTL	9	Q04690-3|NF1_MOUSE:Q04690|NF1_MOUSE:Q04690-4|NF1_MOUSE:Q04690-2|NF1_MOUSE		1	1
B16-F10	SQLKNADVEL	10	P17427|AP2A2_MOUSE		1	1
B16-F10	SQLLNLTQL	9	Q80TH2|ERBIN_MOUSE	1	1	2
B16-F10	SQLPLLSTI	9	A6PWY4-2|WDR76_MOUSE:A6PWY4|WDR76_MOUSE		1	1
B16-F10	SQLQNEFYL	9	Q02788|CO6A2_MOUSE	1		1
B16-F10	SQLQSLTLI	9	Q9QXW0|FBXL6_MOUSE	1		1
B16-F10	SQLRNADVEL	10	P17426-2|AP2A1_MOUSE:P17426|AP2A1_MOUSE		1	1
B16-F10	SQLSLLDYF	9	Q8BKC8|PI4KB_MOUSE	1	1	2
B16-F10	SQLVKADEM	9	Q91YW3|DNJC3_MOUSE	1	1	2
B16-F10	SQPESKVFYL	10	P63101|1433Z_MOUSE		1	1
B16-F10	SQPGPRLPFI	10	Q921N8|GPS2_MOUSE	1	1	2
B16-F10	SQPVNPHSL	9	Q3UHH1|ZSWM8_MOUSE	1	1	2
B16-F10	SQPVPPADIYL	11	Q9D074|MGRN1_MOUSE	1	1	2
B16-F10	SQVINPTAI	9	Q61191|HCFC1_MOUSE		1	1
B16-F10	SQVINPTAITV	11	Q61191|HCFC1_MOUSE	1		1
B16-F10	SQVMNLHNL	9	P29812|TYRP2_MOUSE	1	1	2
B16-F10	SQVTLREPL	9	Q7TMB8-2|CYFP1_MOUSE:Q7TMB8|CYFP1_MOUSE		1	1
B16-F10	SQVVNVLTSVI	11	Q3TQQ9|CA112_MOUSE	1	1	2
B16-F10	SQVYNDAHI	9	Q8BSQ9|PB1_MOUSE	1	1	2
B16-F10	SQYRFTVSDL	10	P51945|CCNG1_MOUSE	1		1
B16-F10	SRDAVRIPTVDGRP	14	A2A7S8|K1522_MOUSE	1		1
B16-F10	SRQESQAPER	10	Q8C804|SPICE_MOUSE	1		1
B16-F10	SSATFEKESVM	11	P51912|AAAT_MOUSE		1	1
B16-F10	SSATNRITV	9	Q9JM05|PIAS4_MOUSE	1	1	2
B16-F10	SSEAPPLVNED	11	Q91YQ5|RPN1_MOUSE		1	1
B16-F10	SSFMNPDKI	9	O35185|BHE40_MOUSE		1	1
B16-F10	SSGINGSFL	9	P00520|ABL1_MOUSE	1	1	2
B16-F10	SSGINVNAA	9	Q60865|CAPR1_MOUSE	1	1	2
B16-F10	SSGINVNAAPF	11	Q60865|CAPR1_MOUSE	1	1	2
B16-F10	SSGVGAQHL	9	Q8BLX7|COGA1_MOUSE	1		1
B16-F10	SSIANLKVSLL	11	Q9D0V8-2|CINP_MOUSE:Q9D0V8-3|CINP_MOUSE:Q9D0V8|CINP_MOUSE		1	1
B16-F10	SSIINFGALI	10	Q80W93|HYDIN_MOUSE		1	1
B16-F10	SSILLIDKV	9	Q8CC35|SYNPO_MOUSE	1	1	2
B16-F10	SSIQLKTNFL	10	Q5PRF0|HTR5A_MOUSE	1	1	2
B16-F10	SSIQNGKYTL	10	Q3UWM4|KDM7A_MOUSE	1	1	2
B16-F10	SSIQNPKVSL	10	Q80WC1|UBN2_MOUSE	1	1	2
B16-F10	SSIRNFLIYV	10	B1AXP6|TOM5_MOUSE	1		1
B16-F10	SSISHSVLSEM	11	Q99K28|ARFG2_MOUSE	1	1	2
B16-F10	SSITNHINKL	10	Q62217|SEM5A_MOUSE	1		1
B16-F10	SSIVAQTAGI	10	Q5SWU9|ACACA_MOUSE:Q5SWU9-2|ACACA_MOUSE		1	1
B16-F10	SSIVNKEGL	9	P49813|TMOD1_MOUSE	1	1	2
B16-F10	SSIVNSIQV	9	Q99PL5|RRBP1_MOUSE	1	1	2
B16-F10	SSIVNSIQVL	10	Q99PL5|RRBP1_MOUSE	1	1	2
B16-F10	SSLANILEL	9	Q8K0Z7|TACO1_MOUSE		1	1
B16-F10	SSLEMTTTF	9	Q91YJ3|THYN1_MOUSE	1		1
B16-F10	SSLENAFQI	9	Q3TUL7|DCA17_MOUSE	1		1
B16-F10	SSLENATSL	9	Q9JJF9|SPP2A_MOUSE	1	1	2
B16-F10	SSLHNVYLI	9	Q60862|ORC2_MOUSE	1		1
B16-F10	SSLINGSFL	9	Q4JIM5|ABL2_MOUSE	1	1	2
B16-F10	SSLKNFQSCI	10	Q91VT1-2|NSE2_MOUSE:Q91VT1|NSE2_MOUSE		1	1
B16-F10	SSLKNGVVL	9	Q8K4I3|ARHG6_MOUSE		1	1
B16-F10	SSLLDSAHL	9	O54774|AP3D1_MOUSE	1	1	2
B16-F10	SSLLNIQHF	9	A2RSJ4|UH1BL_MOUSE	1	1	2
B16-F10	SSLLNLTFI	9	Q9Z1P4|LGR5_MOUSE	1	1	2
B16-F10	SSLLNSEFC	9	Q9JJ28|FLII_MOUSE	1		1
B16-F10	SSLLNSEFCFI	11	Q9JJ28|FLII_MOUSE	1	1	2
B16-F10	SSLMKATVL	9	Q3UFY7-3|5NT3B_MOUSE:Q3UFY7-2|5NT3B_MOUSE:Q3UFY7|5NT3B_MOUSE		1	1
B16-F10	SSLPNLAISTI	11	E9Q555|RN213_MOUSE	1	1	2
B16-F10	SSLQLITEC	9	P28658|ATX10_MOUSE	1	1	2
B16-F10	SSLQNLTSL	9	Q6R5N8|TLR13_MOUSE	1		1
B16-F10	SSLQNYAKI	9	P41251|NRAM1_MOUSE		1	1
B16-F10	SSLSNAKDV	9	Q6P4T2|U520_MOUSE	1		1
B16-F10	SSLSNEHVL	9	Q8BTI7|ANR52_MOUSE	1	1	2
B16-F10	SSLSNPIANTM	11	Q8VE08|FBX33_MOUSE		1	1
B16-F10	SSLVNCNNL	9	Q69ZB0|LRCC1_MOUSE	1	1	2
B16-F10	SSLVNGSTF	9	Q8BHK1|NIPA1_MOUSE		1	1
B16-F10	SSLVNKEDV	9	Q6GQT9|NOMO1_MOUSE	1	1	2
B16-F10	SSLVNKEDVL	10	Q6GQT9|NOMO1_MOUSE		1	1
B16-F10	SSLVNSQTL	9	Q99K90|TAB2_MOUSE	1	1	2
B16-F10	SSPANISSL	9	P51125-5|ICAL_MOUSE:P51125-4|ICAL_MOUSE:P51125-7|ICAL_MOUSE:P51125-3|ICAL_MOUSE:P51125-2|ICAL_MOUSE:P51125-6|ICAL_MOUSE:P51125|ICAL_MOUSE		1	1
B16-F10	SSPASTPLSPM	11	Q91YK2|RRP1B_MOUSE		1	1
B16-F10	SSPENKNWL	9	Q3TLR7|DTL_MOUSE:Q3TLR7-2|DTL_MOUSE		1	1
B16-F10	SSPENKNWLL	10	Q3TLR7|DTL_MOUSE	1	1	2
B16-F10	SSPENLKGFI	10	Q3URQ0|TEX10_MOUSE	1		1
B16-F10	SSPGPLPEEI	10	Q3UND0-2|SKAP2_MOUSE:Q3UND0|SKAP2_MOUSE		1	1
B16-F10	SSPGRHEAQEPF	12	O89023|TPP1_MOUSE	1		1
B16-F10	SSPINISGQVI	11	Q80WE4-4|KI20B_MOUSE:Q80WE4-2|KI20B_MOUSE:Q80WE4-3|KI20B_MOUSE:Q80WE4|KI20B_MOUSE		1	1
B16-F10	SSPKNVQGL	9	Q62230|SN_MOUSE	1	1	2
B16-F10	SSPLGKDLL	9	Q921I1|TRFE_MOUSE	1	1	2
B16-F10	SSPLNDDLL	9	P35761-2|TTK_MOUSE:P35761|TTK_MOUSE		1	1
B16-F10	SSPLNHIYL	9	Q9CPW9|MAP12_MOUSE	1	1	2
B16-F10	SSPLNQPATFL	11	Q7TNC6|KI26B_MOUSE	1		1
B16-F10	SSPMGSSEGLL	11	Q9CW46|RAVR1_MOUSE	1		1
B16-F10	SSPQNQEQI	9	Q07243|MTF1_MOUSE	1	1	2
B16-F10	SSPRNSDWF	9	Q9QY01|ULK2_MOUSE		1	1
B16-F10	SSPSNIHNI	9	Q3UQ44|IQGA2_MOUSE		1	1
B16-F10	SSPSNKFFF	9	E9Q5F9|SETD2_MOUSE	1		1
B16-F10	SSPTGGPTL	9	O35206|COFA1_MOUSE	1	1	2
B16-F10	SSPTNSAITQL	11	Q9R0G7|ZEB2_MOUSE		1	1
B16-F10	SSPTSTEYI	9	P58929|GMEB2_MOUSE	1	1	2
B16-F10	SSPVNPVVF	9	Q9D868|PPIH_MOUSE	1	1	2
B16-F10	SSPVNVKKL	9	Q8VEK3|HNRPU_MOUSE	1	1	2
B16-F10	SSSLNAEAI	9	Q62261|SPTB2_MOUSE:Q62261-2|SPTB2_MOUSE		1	1
B16-F10	SSSLNQEKI	9	Q5DTT3|F208B_MOUSE	1	1	2
B16-F10	SSSPGGAYVTR	11	P20152|VIME_MOUSE	1		1
B16-F10	SSSSSSYGSGRRF	13	P49312|ROA1_MOUSE	1		1
B16-F10	SSSTNVDLL	9	Q9D2C2-2|SAAL1_MOUSE:Q9D2C2|SAAL1_MOUSE		1	1
B16-F10	SSTTNIDDL	9	A2AGT5|CKAP5_MOUSE		1	1
B16-F10	SSTTNPKLSTL	11	Q9EST3|4ET_MOUSE	1	1	2
B16-F10	SSVFNVEMV	9	Q811I0|ATPF1_MOUSE		1	1
B16-F10	SSVLNKLVV	9	Q91ZJ5|UGPA_MOUSE	1		1
B16-F10	SSVLNLTEL	9	Q8BW56|GTDC1_MOUSE	1	1	2
B16-F10	SSVLNVVSM	9	P55200|KMT2A_MOUSE	1	1	2
B16-F10	SSVPGVRLL	9	P20152|VIME_MOUSE	1		1
B16-F10	SSVQNGIML	9	Q80U04|PJA2_MOUSE	1	1	2
B16-F10	SSVQNKEYL	9	B2RRE4|Z518B_MOUSE	1	1	2
B16-F10	SSVSNKTTL	9	Q148V7|K1468_MOUSE	1	1	2
B16-F10	SSVVGVWYL	9	Q9D8V0|HM13_MOUSE:Q9D8V0-4|HM13_MOUSE		1	1
B16-F10	SSWWTHVEMGPPD	13	P05202|AATM_MOUSE	1		1
B16-F10	STDAWPQELAP	11	P29812|TYRP2_MOUSE	1		1
B16-F10	STFSHHSMVSM	11	Q80X50-3|UBP2L_MOUSE:Q80X50-4|UBP2L_MOUSE:Q80X50|UBP2L_MOUSE:Q80X50-5|UBP2L_MOUSE		1	1
B16-F10	STIINEDASFF	11	Q7TN98|CPEB4_MOUSE	1	1	2
B16-F10	STIKNANFV	9	Q9JI39|ABCBA_MOUSE		1	1
B16-F10	STIMNLLSL	9	Q6PAR5|GAPD1_MOUSE	1	1	2
B16-F10	STIRNADVI	9	P21440|MDR3_MOUSE	1	1	2
B16-F10	STIRNAQSI	9	Q09014|NCF1_MOUSE	1	1	2
B16-F10	STISNDVFI	9	Q80U12|SGSM2_MOUSE	1	1	2
B16-F10	STITNIILV	9	Q8VC49|IF27B_MOUSE		1	1
B16-F10	STITNPSAI	9	B2RQC2|UBP42_MOUSE	1	1	2
B16-F10	STLINSLFL	9	O55131|SEPT7_MOUSE:P42208|SEPT2_MOUSE:P42209|SEPT1_MOUSE	1	1	2
B16-F10	STLLNAQTL	9	Q6ZWQ0|SYNE2_MOUSE		1	1
B16-F10	STLLNYDYI	9	O70423|AOC3_MOUSE	1	1	2
B16-F10	STLRLLTTI	9	Q4VA53|PDS5B_MOUSE	1	1	2
B16-F10	STLRNIRTV	9	Q9DBZ1|IKIP_MOUSE		1	1
B16-F10	STLVHKFFL	9	Q6PCL9|PAPOG_MOUSE:Q61183|PAPOA_MOUSE	1	1	2
B16-F10	STLVNSLFL	9	P28661-6|SEPT4_MOUSE:P28661-5|SEPT4_MOUSE:P28661-4|SEPT4_MOUSE:P28661-3|SEPT4_MOUSE:P28661-2|SEPT4_MOUSE:P28661|SEPT4_MOUSE		1	1
B16-F10	STMQLADHI	9	O08788-2|DCTN1_MOUSE:O08788|DCTN1_MOUSE		1	1
B16-F10	STMVNADHF	9	P58196|PLS4_MOUSE		1	1
B16-F10	STPDADWLQLKPL	13	Q6P5F6|S39AA_MOUSE		1	1
B16-F10	STPVNVTSL	9	E9Q5G3|KIF23_MOUSE		1	1
B16-F10	STRSVSSSSY	10	P20152|VIME_MOUSE		1	1
B16-F10	STVFNPSVL	9	Q8C181-2|MBNL2_MOUSE:Q8C181|MBNL2_MOUSE:Q8C181-4|MBNL2_MOUSE		1	1
B16-F10	STVLTSKYR	9	P01942|HBA_MOUSE	1	1	2
B16-F10	STVQNAEAYVL	11	Q8R5K2|UBP33_MOUSE	1		1
B16-F10	STVRNADVI	9	P21447|MDR1A_MOUSE:P06795|MDR1B_MOUSE	1	1	2
B16-F10	STVVNADQI	9	Q9DC29|ABCB6_MOUSE	1	1	2
B16-F10	STVVNEAKL	9	Q2UY11-2|COSA1_MOUSE:Q2UY11|COSA1_MOUSE		1	1
B16-F10	SVADYFKQIGIIKT	14	P56959|FUS_MOUSE	1		1
B16-F10	SVIVVLRNPLIAGK	14	P62317|SMD2_MOUSE	1		1
B16-F10	SVLFNLTTM	9	Q8K2L8|TPC12_MOUSE	1	1	2
B16-F10	SVLNVNHI	8	Q99NH0|ANR17_MOUSE		1	1
B16-F10	SVLRLVDAL	9	Q9Z2V5|HDAC6_MOUSE		1	1
B16-F10	SVMENSKVLGEAM	13	P26039|TLN1_MOUSE		1	1
B16-F10	SVSTVLTSKYR	11	P01942|HBA_MOUSE		1	1
B16-F10	SVSVSQLQ	8	Q60696|PMEL_MOUSE		1	1
B16-F10	SVVQNQQQV	9	Q6KCD5|NIPBL_MOUSE	1	1	2
B16-F10	SYDRAITVFSPD	12	Q9Z2U0|PSA7_MOUSE	1		1
B16-F10	SYVTTSTRT	9	P20152|VIME_MOUSE	1		1
B16-F10	TAIENATVAF	10	O88738|BIRC6_MOUSE	1		1
B16-F10	TAIENSWIHL	10	Q9CQG2|MET16_MOUSE	1	1	2
B16-F10	TAILNDYEL	9	Q6ZQ12|NINL_MOUSE	1	1	2
B16-F10	TAIMNSDCL	9	Q06985|SIA1B_MOUSE:P61092|SIA1A_MOUSE		1	1
B16-F10	TALEHQEYI	9	O35658|C1QBP_MOUSE		1	1
B16-F10	TALENLIVL	9	Q69ZR2|HECD1_MOUSE	1	1	2
B16-F10	TALENLSTL	9	P19096|FAS_MOUSE	1	1	2
B16-F10	TALKNSTMV	9	Q80XE1|RIC8B_MOUSE	1		1
B16-F10	TALLNAPHI	9	Q9JLB2|MPP5_MOUSE	1	1	2
B16-F10	TALQNYLTEAL	11	P34056-2|AP2A_MOUSE:P34056-3|AP2A_MOUSE:P34056|AP2A_MOUSE:P34056-4|AP2A_MOUSE		1	1
B16-F10	TAPDNLGYA	9	P07147|TYRP1_MOUSE	1	1	2
B16-F10	TAPSNSVSQSL	11	Q3UWW6|GA2L3_MOUSE		1	1
B16-F10	TAPTNATYP	9	Q99NH0|ANR17_MOUSE		1	1
B16-F10	TAPVNIAVI	9	Q99JF5|MVD1_MOUSE	1	1	2
B16-F10	TAPYNYSYI	9	Q91V41|RAB14_MOUSE	1	1	2
B16-F10	TAVANNQAL	9	Q9R1W5|CALRL_MOUSE	1	1	2
B16-F10	TAVHAGNINFKWD	13	P26231|CTNA1_MOUSE	1		1
B16-F10	TAVISYDYL	9	Q9D0L4|ADCK1_MOUSE	1	1	2
B16-F10	TAVLNLHEHL	10	Q6ZWQ0|SYNE2_MOUSE		1	1
B16-F10	TAVRNGFHSL	10	A2AN08-3|UBR4_MOUSE:A2AN08|UBR4_MOUSE:A2AN08-5|UBR4_MOUSE		1	1
B16-F10	TAVTNSARL	9	P59016|VP33B_MOUSE	1	1	2
B16-F10	TAVVNRVFDKL	11	P28076|PSB9_MOUSE	1		1
B16-F10	TAVVNVTYM	9	Q5SF07|IF2B2_MOUSE	1	1	2
B16-F10	TDAAVSFAKDFLA	13	P51881|ADT2_MOUSE		1	1
B16-F10	TDQVPFSVSVSQLQ	14	Q60696|PMEL_MOUSE	1		1
B16-F10	TDVMLCVGETGGGK	14	Q9JM71|K1B27_MOUSE		1	1
B16-F10	TERPADFTTDASSA	14	Q8C9B9|DIDO1_MOUSE		1	1
B16-F10	TEVLKTNGLLV	11	P19253|RL13A_MOUSE	1		1
B16-F10	TEWLDGKHVVF	11	P17742|PPIA_MOUSE	1		1
B16-F10	TFTDAVFDEWLR	12	P07147|TYRP1_MOUSE	1		1
B16-F10	TGAKNLYII	9	P62830|RL23_MOUSE		1	1
B16-F10	TGFDKTKLESM	11	Q811J3|IREB2_MOUSE		1	1
B16-F10	TGIANENHNTL	11	Q8BR07|BICD1_MOUSE	1	1	2
B16-F10	TGIKNGVHF	9	Q9WUQ2|PREB_MOUSE		1	1
B16-F10	TGIKNGVHFL	10	Q9WUQ2|PREB_MOUSE	1	1	2
B16-F10	TGILNPEGYTL	11	O88554|PARP2_MOUSE	1	1	2
B16-F10	TGIRNLEWL	9	Q8BMD6|TM260_MOUSE	1	1	2
B16-F10	TGPENSNTDTL	11	A2AWL7-3|MGAP_MOUSE		1	1
B16-F10	TGPFNLQLI	9	B2RQC6-2|PYR1_MOUSE:B2RQC6|PYR1_MOUSE		1	1
B16-F10	TGPSNVDKL	9	O35280|CHK1_MOUSE	1	1	2
B16-F10	TGTTNPFLL	9	Q8CHU3-2|EPN2_MOUSE:Q8CHU3|EPN2_MOUSE		1	1
B16-F10	TGVINAPETI	10	P32037|GTR3_MOUSE		1	1
B16-F10	TGVTNRDLI	9	Q6DFV3|RHG21_MOUSE	1	1	2
B16-F10	TGVVNAQAL	9	Q61753|SERA_MOUSE	1	1	2
B16-F10	TGVVNGESL	9	Q61666|HIRA_MOUSE	1	1	2
B16-F10	TGYLNTVTV	9	P68040|RACK1_MOUSE		1	1
B16-F10	TISPLDLAKLNQVA	14	P60335|PCBP1_MOUSE	1		1
B16-F10	TIVNIHEL	8	Q6RI63|F120B_MOUSE	1		1
B16-F10	TLDEKNYVKAM	11	Q99JT9|MTND_MOUSE		1	1
B16-F10	TLDEKNYVKAMRLF	14	Q99JT9|MTND_MOUSE	1		1
B16-F10	TLFGNNKL	8	Q6PFD9|NUP98_MOUSE	1		1
B16-F10	TLGVKQLIVGVNK	13	P10126|EF1A1_MOUSE	1		1
B16-F10	TLPTKETIEQEK	12	Q6ZWY8|TYB10_MOUSE	1	1	2
B16-F10	TLWGIQKELQF	11	P06151|LDHA_MOUSE	1	1	2
B16-F10	TLYEPEPQI	9	Q8C5L6|INP5K_MOUSE	1		1
B16-F10	TMKTNLEYL	9	Q924W5|SMC6_MOUSE	1	1	2
B16-F10	TNPESKVFYL	10	P68254|1433T_MOUSE	1		1
B16-F10	TNWDDMEKIW	10	P60710|ACTB_MOUSE:P63260|ACTG_MOUSE:P68134|ACTS_MOUSE	1		1
B16-F10	TPVKNIDTV	9	Q6A026|PDS5A_MOUSE	1	1	2
B16-F10	TQAESKVFYL	10	Q9CQV8|1433B_MOUSE	1	1	2
B16-F10	TQGQNIQHL	9	Q80YT7|MYOME_MOUSE	1	1	2
B16-F10	TQILGGELF	9	Q3UFY4|RSH3A_MOUSE		1	1
B16-F10	TQPLNGRTI	9	Q8VHB5|CAH9_MOUSE		1	1
B16-F10	TQPVNLFNL	9	Q9R0L6|PCM1_MOUSE:Q9R0L6-2|PCM1_MOUSE		1	1
B16-F10	TSANHAMI	8	P16110|LEG3_MOUSE	1		1
B16-F10	TSAQNVEFL	9	A3KGV1|ODFP2_MOUSE	1		1
B16-F10	TSIKNQTQL	9	Q91VU7|PUS7_MOUSE:Q91VU7-2|PUS7_MOUSE		1	1
B16-F10	TSIPNFSYM	9	Q8VE62|PAIP1_MOUSE	1	1	2
B16-F10	TSIPNVTEI	9	Q3V3R4|ITA1_MOUSE		1	1
B16-F10	TSLLNLTVI	9	Q8BM54|MYLIP_MOUSE	1	1	2
B16-F10	TSLVNFFSSL	10	P09813|APOA2_MOUSE	1		1
B16-F10	TSPINAEKL	9	Q6PDN3|MYLK_MOUSE	1	1	2
B16-F10	TSPINPQHM	9	Q3UHC0|TNR6C_MOUSE	1	1	2
B16-F10	TSPINPYKDHM	11	Q9R0G7|ZEB2_MOUSE	1	1	2
B16-F10	TSPKNAAVF	9	Q8BGF7|PAN2_MOUSE	1		1
B16-F10	TSPRNISPGL	10	Q9Z1T6|FYV1_MOUSE	1		1
B16-F10	TSPTNFPAVL	10	P41234|ABCA2_MOUSE	1	1	2
B16-F10	TSPTNSQQL	9	Q8BM75-2|ARI5B_MOUSE:Q8BM75|ARI5B_MOUSE		1	1
B16-F10	TSPVNPAVF	9	P61166|TM258_MOUSE	1	1	2
B16-F10	TSVENHEFL	9	Q8CJF7|ELYS_MOUSE		1	1
B16-F10	TSVSNFLVM	9	Q920R0|ALS2_MOUSE	1	1	2
B16-F10	TTDAEFHTFFNE	12	P19221|THRB_MOUSE	1		1
B16-F10	TTLRNGEVL	9	Q9CYV5|TM135_MOUSE	1	1	2
B16-F10	TTTTTFKGVD	10	P97825|JUPI1_MOUSE	1	1	2
B16-F10	TTVHAITATQ	10	P16858|G3P_MOUSE	1	1	2
B16-F10	TTVTNPEPM	9	P13864|DNMT1_MOUSE	1	1	2
B16-F10	TTVTNSTPL	9	Q9Z2G0|FEM1B_MOUSE	1	1	2
B16-F10	TVEVDLYTAKGLF	13	P17182|ENOA_MOUSE	1		1
B16-F10	TVHAITATQ	9	P16858|G3P_MOUSE	1		1
B16-F10	TVLTSKYR	8	P01942|HBA_MOUSE	1		1
B16-F10	TWDFGDGTGTL	11	Q60696|PMEL_MOUSE	1		1
B16-F10	TWDFGDGTGTLIS	13	Q60696|PMEL_MOUSE	1		1
B16-F10	TWDFGDGTGTLISR	14	Q60696|PMEL_MOUSE	1		1
B16-F10	VAAANREVL	9	Q61806|XL3C_MOUSE:Q60595|XL3A_MOUSE:Q6P205|XL3B_MOUSE	1	1	2
B16-F10	VAAFNKI	7	O70251|EF1B_MOUSE		1	1
B16-F10	VAASKERSGVSLAA	14	P43274|H14_MOUSE:P15864|H12_MOUSE:P43277|H13_MOUSE	1		1
B16-F10	VAASNIVQM	9	Q9R1P3|PSB2_MOUSE		1	1
B16-F10	VADYFKQIGIIKT	13	P56959|FUS_MOUSE	1		1
B16-F10	VAIENPADVSVI	12	P14206|RSSA_MOUSE	1	1	2
B16-F10	VAIGNPVHL	9	Q61329|ZFHX3_MOUSE		1	1
B16-F10	VAILDSTTI	9	Q01320|TOP2A_MOUSE	1	1	2
B16-F10	VAIQNKNEI	9	Q01102|LYAM3_MOUSE		1	1
B16-F10	VAISNLPAATF	11	Q9R0M8|S35A2_MOUSE	1	1	2
B16-F10	VAISPGKHYL	10	Q2EMV9|PAR14_MOUSE		1	1
B16-F10	VALAKGEVAEM	11	Q9D8V0|HM13_MOUSE:Q9D8V0-4|HM13_MOUSE		1	1
B16-F10	VALENANAV	9	Q9D6Z1|NOP56_MOUSE	1	1	2
B16-F10	VALGNMYEL	9	P11103|PARP1_MOUSE		1	1
B16-F10	VALINKDFL	9	Q8R115|TMM82_MOUSE		1	1
B16-F10	VALKNKQEL	9	Q9CR14|FANCL_MOUSE		1	1
B16-F10	VALLNETESVL	11	Q924K8|MTA3_MOUSE	1	1	2
B16-F10	VALLNKTNV	9	Q02248|CTNB1_MOUSE	1	1	2
B16-F10	VALLNLENM	9	Q6NS46|RRP5_MOUSE	1	1	2
B16-F10	VALRNINLI	9	O35643|AP1B1_MOUSE	1	1	2
B16-F10	VALRNLEQI	9	Q99LH9|3BP5L_MOUSE	1	1	2
B16-F10	VALSNMNVI	9	Q11011|PSA_MOUSE		1	1
B16-F10	VAMVNGVSM	9	P39447|ZO1_MOUSE		1	1
B16-F10	VANKIGII	8	P62751|RL23A_MOUSE		1	1
B16-F10	VAPANKTGI	9	Q8CC35-2|SYNPO_MOUSE:Q8CC35-3|SYNPO_MOUSE:Q8CC35|SYNPO_MOUSE		1	1
B16-F10	VAPANSLVHAF	11	Q6PNC0|DMXL1_MOUSE	1	1	2
B16-F10	VAPASVITI	9	O54791|MAFF_MOUSE		1	1
B16-F10	VAPEEHPVLL	10	P60710|ACTB_MOUSE:P63260|ACTG_MOUSE	1		1
B16-F10	VAPENLPAL	9	Q91V24|ABCA7_MOUSE	1	1	2
B16-F10	VAPENLPALLL	11	Q91V24|ABCA7_MOUSE		1	1
B16-F10	VAPESSETL	9	Q9WTQ5|AKA12_MOUSE	1	1	2
B16-F10	VAPGNQVTL	9	Q61398|PCOC1_MOUSE	1	1	2
B16-F10	VAPLNADDQTL	11	Q9Z0U0-2|XPR1_MOUSE:Q9Z0U0|XPR1_MOUSE		1	1
B16-F10	VAPLNLGMI	9	Q6P4T2|U520_MOUSE		1	1
B16-F10	VAPQSQELL	9	Q9D786|HAUS5_MOUSE:Q9D786-2|HAUS5_MOUSE		1	1
B16-F10	VAPSSVVEL	9	Q924C1|XPO5_MOUSE	1	1	2
B16-F10	VAPSTPEEYL	10	Q9NWG9|MAGH1_MOUSE	1		1
B16-F10	VAPTNPQAV	9	Q99N94|RM09_MOUSE	1	1	2
B16-F10	VAPTNPRFGGKEL	13	P97311|MCM6_MOUSE		1	1
B16-F10	VAPTSTVAV	9	P56671|MAZ_MOUSE	1	1	2
B16-F10	VAPYNTTQF	9	Q8R409|HEXI1_MOUSE		1	1
B16-F10	VAPYNTTQFL	10	Q8R409|HEXI1_MOUSE	1	1	2
B16-F10	VATVNKAGSEL	11	Q9QXZ0|MACF1_MOUSE		1	1
B16-F10	VAVCNLASL	9	P07742|RIR1_MOUSE		1	1
B16-F10	VAVGPLGSTI	10	Q9DCP9|DAZP2_MOUSE	1	1	2
B16-F10	VAVKNSGGFL	10	Q3TZZ7|ESYT2_MOUSE:Q3TZZ7-2|ESYT2_MOUSE		1	1
B16-F10	VAVNNTECL	9	Q80U44|ZFY16_MOUSE	1	1	2
B16-F10	VAVSNLEKV	9	Q5SVT3-3|ETAA1_MOUSE:Q5SVT3-2|ETAA1_MOUSE:Q5SVT3|ETAA1_MOUSE		1	1
B16-F10	VAVVNDTVGTM	11	O08528|HXK2_MOUSE:P17710-3|HXK1_MOUSE:P17710-4|HXK1_MOUSE:P17710-2|HXK1_MOUSE:P17710|HXK1_MOUSE		1	1
B16-F10	VAVVNKVDI	9	O35604|NPC1_MOUSE	1	1	2
B16-F10	VAYMNPIAM	9	Q9CVI2-2|F133B_MOUSE:Q9CVI2|F133B_MOUSE		1	1
B16-F10	VCIENTETL	9	P97329|KI20A_MOUSE		1	1
B16-F10	VCPSNKPAI	9	Q02257|PLAK_MOUSE		1	1
B16-F10	VCVDNSEYM	9	O35226-5|PSMD4_MOUSE:O35226-4|PSMD4_MOUSE:O35226-3|PSMD4_MOUSE:O35226|PSMD4_MOUSE:O35226-2|PSMD4_MOUSE		1	1
B16-F10	VDDPEAFPALA	11	Q9CY58|PAIRB_MOUSE	1		1
B16-F10	VDVTNTTFL	9	O89079|COPE_MOUSE	1	1	2
B16-F10	VELDDLEKDEL	11	Q922R8|PDIA6_MOUSE	1		1
B16-F10	VGFGGLEAM	9	Q8C854|MYEF2_MOUSE	1	1	2
B16-F10	VGIENIHVM	9	Q8VE11|MTMR6_MOUSE	1	1	2
B16-F10	VGIRNTFLL	9	Q91YI6-2|GLD2_MOUSE:Q91YI6|GLD2_MOUSE		1	1
B16-F10	VGLINKDSV	9	Q99MY8|ASH1L_MOUSE	1	1	2
B16-F10	VGLSNLQFI	9	Q9EPR4|S23A2_MOUSE		1	1
B16-F10	VGPEHGTEI	9	Q80SU7|GVIN1_MOUSE	1	1	2
B16-F10	VGPENMQIM	9	Q80TL7|MON2_MOUSE	1	1	2
B16-F10	VGPLGSTIPM	10	Q9DCP9|DAZP2_MOUSE		1	1
B16-F10	VGPRNTEYTL	10	P42703|LIFR_MOUSE		1	1
B16-F10	VGPRVGLARAQS	12	O09043|NAPSA_MOUSE		1	1
B16-F10	VGPRYTNL	8	P63085|MK01_MOUSE		1	1
B16-F10	VGPVNKKGFYL	11	P29319|EPHA3_MOUSE	1		1
B16-F10	VGSNITFVVN	10	Q99P91|GPNMB_MOUSE	1		1
B16-F10	VGVENVAEL	9	Q9ET01|PYGL_MOUSE		1	1
B16-F10	VGVKPVGSD	9	Q8CDN6|TXNL1_MOUSE	1	1	2
B16-F10	VGVNNPVFL	9	Q9DBN5|LONP2_MOUSE	1	1	2
B16-F10	VGVNNPVFLL	10	Q9DBN5|LONP2_MOUSE:Q9DBN5-2|LONP2_MOUSE:Q9DBN5-3|LONP2_MOUSE		1	1
B16-F10	VGVTTTST	8	P83741|WNK1_MOUSE	1		1
B16-F10	VGVVNPILA	9	Q3UEB3|PUF60_MOUSE	1	1	2
B16-F10	VGVVSVEFI	9	P97432|NBR1_MOUSE		1	1
B16-F10	VGVWNVPYI	9	Q9R0E2|PLOD1_MOUSE	1	1	2
B16-F10	VGVYNGKTF	9	P62843|RS15_MOUSE	1	1	2
B16-F10	VHELFLQM	8	Q9D3G5|STX11_MOUSE	1		1
B16-F10	VHLTDAEKAA	10	P02088|HBB1_MOUSE	1	1	2
B16-F10	VHLTDAEKAAV	11	P02088|HBB1_MOUSE		1	1
B16-F10	VHPGAATVPTM	11	Q9DCP9|DAZP2_MOUSE	1	1	2
B16-F10	VIGRNGEMI	9	Q91WJ8|FUBP1_MOUSE		1	1
B16-F10	VIHDNFGIVE	10	P16858|G3P_MOUSE	1		1
B16-F10	VIHDNFGIVEG	11	P16858|G3P_MOUSE	1		1
B16-F10	VIHDNFGIVEGLM	13	P16858|G3P_MOUSE	1	1	2
B16-F10	VIILNHPGQI	10	P10126|EF1A1_MOUSE		1	1
B16-F10	VIVNNKGEM	9	P62830|RL23_MOUSE	1		1
B16-F10	VIYAGVRGYL	10	Q03265|ATPA_MOUSE	1		1
B16-F10	VLDLDLFRVD	10	P26638|SYSC_MOUSE	1		1
B16-F10	VLDLDLFRVDKGGD	14	P26638|SYSC_MOUSE	1	1	2
B16-F10	VLFDKATYDKL	11	P62852|RS25_MOUSE	1		1
B16-F10	VLGQNAQTM	9	Q91W50|CSDE1_MOUSE	1	1	2
B16-F10	VLIKLTTAM	9	Q9D281|NXP20_MOUSE	1		1
B16-F10	VLLELQQHL	9	Q8BH52|CR3L2_MOUSE	1		1
B16-F10	VLLTMIARVAD	11	O08547|SC22B_MOUSE	1		1
B16-F10	VLSGEDKSNIK	11	P01942|HBA_MOUSE	1		1
B16-F10	VLSGEDKSNIKA	12	P01942|HBA_MOUSE	1	1	2
B16-F10	VLSGEDKSNIKAA	13	P01942|HBA_MOUSE	1	1	2
B16-F10	VLTLLESEREARRL	14	P62858|RS28_MOUSE	1		1
B16-F10	VMIPNVETI	9	Q5I012|S38AA_MOUSE	1		1
B16-F10	VMLENYSHL	9	Q60585|ZFP30_MOUSE:Q62396|ZFP92_MOUSE:P16372|ZFP58_MOUSE	1	1	2
B16-F10	VMLENYSNL	9	Q9QXT9|Z354B_MOUSE:Q61751|Z354A_MOUSE:P08042|ZFP1_MOUSE:Q571J5|Z354C_MOUSE:Q8BI99|ZN879_MOUSE:Q6P5C7|ZN728_MOUSE	1		1
B16-F10	VMPQNQKAI	9	Q9DCX2|ATP5H_MOUSE		1	1
B16-F10	VMVTNVTSL	9	P26039|TLN1_MOUSE	1	1	2
B16-F10	VNFEFPEF	8	P62082|RS7_MOUSE		1	1
B16-F10	VNFEFPEFQL	10	P62082|RS7_MOUSE		1	1
B16-F10	VNFTVDQIRAIMD	13	P58252|EF2_MOUSE	1	1	2
B16-F10	VNPTVFFD	8	P17742|PPIA_MOUSE	1	1	2
B16-F10	VNPTVFFDITAD	12	P17742|PPIA_MOUSE	1	1	2
B16-F10	VNPTVFFDITADD	13	P17742|PPIA_MOUSE	1	1	2
B16-F10	VNVSHKEYL	9	Q6ZWQ0|SYNE2_MOUSE	1	1	2
B16-F10	VPAGPLTVPYD	11	P16110|LEG3_MOUSE	1		1
B16-F10	VPFSVSVSQLQ	11	Q60696|PMEL_MOUSE	1		1
B16-F10	VPPVNGVEI	9	Q7TPM1-2|PRC2B_MOUSE:Q7TPM1|PRC2B_MOUSE		1	1
B16-F10	VQAVLTSDSPA	11	Q99P91|GPNMB_MOUSE	1		1
B16-F10	VQGPAASSRDAVQA	14	A2A870|FBF1_MOUSE	1		1
B16-F10	VQIKNDVFI	9	Q6PAR0|KLD10_MOUSE	1	1	2
B16-F10	VQLENQMVL	9	Q9WU84|CCS_MOUSE	1	1	2
B16-F10	VQLQLLTAI	9	O35643|AP1B1_MOUSE	1	1	2
B16-F10	VQPEHIQYL	9	Q6P5D8|SMHD1_MOUSE		1	1
B16-F10	VQPFNYVTL	9	Q9Z2G1|FM1AA_MOUSE		1	1
B16-F10	VQPINQHVL	9	Q8R2X8|GO45_MOUSE:Q8R2X8-2|GO45_MOUSE		1	1
B16-F10	VQPSNKDLYL	10	Q9D2N8|GLTL2_MOUSE		1	1
B16-F10	VQPTHVIHL	9	P23591|FCL_MOUSE		1	1
B16-F10	VQTEAQYVFL	10	E9Q0N2|PTPRH_MOUSE	1		1
B16-F10	VQVPNLESL	9	Q09XV5|CHD8_MOUSE	1	1	2
B16-F10	VQVQNIQSL	9	Q62445|SP4_MOUSE		1	1
B16-F10	VQWPGQEFT	9	P07147|TYRP1_MOUSE	1	1	2
B16-F10	VRNPQQHL	8	P29341|PABP1_MOUSE	1		1
B16-F10	VSARNIMLL	9	Q91W50|CSDE1_MOUSE	1	1	2
B16-F10	VSELITKA	8	P43274|H14_MOUSE:P15864|H12_MOUSE:P43277|H13_MOUSE	1		1
B16-F10	VSIEHQELM	9	Q80SU7|GVIN1_MOUSE		1	1
B16-F10	VSILNRQVL	9	E9Q7G0|NUMA1_MOUSE	1	1	2
B16-F10	VSILNYQSAL	10	Q9QZR5|HIPK2_MOUSE	1		1
B16-F10	VSLELMTEM	9	Q8C0L6|PAOX_MOUSE		1	1
B16-F10	VSLINAHSL	9	Q924T7-2|RNF31_MOUSE:Q924T7|RNF31_MOUSE		1	1
B16-F10	VSLLDIDHL	9	Q8BQM4|HEAT3_MOUSE	1	1	2
B16-F10	VSLLNPPETL	10	P51943|CCNA2_MOUSE	1	1	2
B16-F10	VSLLNVYYI	9	P31649|S6A13_MOUSE		1	1
B16-F10	VSLLNYQSAL	10	O88904|HIPK1_MOUSE	1	1	2
B16-F10	VSLRNSISNFL	11	Q5SWU9|ACACA_MOUSE	1	1	2
B16-F10	VSLRVIND	8	Q60696|PMEL_MOUSE	1	1	2
B16-F10	VSMANLGHLTL	11	Q80VA5-4|S3TC2_MOUSE:Q80VA5|S3TC2_MOUSE:Q80VA5-2|S3TC2_MOUSE		1	1
B16-F10	VSNLNRQFL	9	Q9Z1F9|SAE2_MOUSE		1	1
B16-F10	VSNVNIELL	9	P82198|BGH3_MOUSE	1	1	2
B16-F10	VSPANSTTL	9	Q9QZI9|SERC3_MOUSE	1	1	2
B16-F10	VSPLNVTAV	9	Q9CR27|WASC3_MOUSE	1		1
B16-F10	VSPQNVHHSYL	11	Q69ZS7-3|HBS1L_MOUSE		1	1
B16-F10	VSPTGGEVI	9	Q7TNH6-2|NPHP3_MOUSE:Q7TNH6|NPHP3_MOUSE		1	1
B16-F10	VSPTGTHTL	9	P28798|GRN_MOUSE	1	1	2
B16-F10	VSPTHMYFI	9	P36993-2|PPM1B_MOUSE:P36993-4|PPM1B_MOUSE:P36993|PPM1B_MOUSE:P36993-3|PPM1B_MOUSE:P36993-5|PPM1B_MOUSE		1	1
B16-F10	VSPTNPTKL	9	Q3UHC7|DAB2P_MOUSE	1	1	2
B16-F10	VSPTNPTKLQI	11	Q3UHC7-2|DAB2P_MOUSE:Q3UHC7|DAB2P_MOUSE:Q3UHC7-3|DAB2P_MOUSE		1	1
B16-F10	VSPVNENQI	9	Q99K46|UBP11_MOUSE	1	1	2
B16-F10	VSPVSKEEL	9	A2AG50|MA7D2_MOUSE:A2AG50-2|MA7D2_MOUSE		1	1
B16-F10	VSSINQEAL	9	Q9JKP8|CHRC1_MOUSE	1	1	2
B16-F10	VSTVLTSKYR	10	P01942|HBA_MOUSE	1		1
B16-F10	VSVANVDLL	9	Q80Y17|L2GL1_MOUSE	1	1	2
B16-F10	VSVENGMII	9	Q8BHL8|PSMF1_MOUSE		1	1
B16-F10	VSVTNEHLM	9	P50592|TNF10_MOUSE		1	1
B16-F10	VSVTNLEEL	9	Q6ZWR6|SYNE1_MOUSE	1	1	2
B16-F10	VSVTNSMTV	9	Q64339|ISG15_MOUSE	1	1	2
B16-F10	VSVVNNYAL	9	Q8CIA5|S35B4_MOUSE		1	1
B16-F10	VSYRNIEEL	9	F6ZDS4|TPR_MOUSE		1	1
B16-F10	VTIRLLDVL	9	P28658|ATX10_MOUSE	1	1	2
B16-F10	VTIRLLETI	9	Q9CRA4|MSMO1_MOUSE	1	1	2
B16-F10	VTLANKELL	9	P52019|ERG1_MOUSE		1	1
B16-F10	VTLENYTHL	9	Q7TSH9|ZN184_MOUSE	1		1
B16-F10	VTNLNPDFI	9	Q8BHD7-2|PTBP3_MOUSE:Q8BHD7|PTBP3_MOUSE		1	1
B16-F10	VTVENTKTI	9	E9Q784|ZC3HD_MOUSE	1	1	2
B16-F10	VTVLNITHL	9	E9PZJ8|ASCC3_MOUSE	1		1
B16-F10	VTVLNVDHL	9	Q9WUF3|C8AP2_MOUSE	1	1	2
B16-F10	VTVVNSQTL	9	E9Q7E2|ARID2_MOUSE	1		1
B16-F10	VVAFGEFSTL	10	Q4QY64|ATAD5_MOUSE		1	1
B16-F10	VVDLMAYMASKE	12	P16858|G3P_MOUSE	1		1
B16-F10	VVVENGELI	9	P08775|RPB1_MOUSE	1	1	2
B16-F10	VVVENITLM	9	A2AN08|UBR4_MOUSE	1	1	2
B16-F10	WAFKNPDTI	9	Q9CQE7|ERGI3_MOUSE	1		1
B16-F10	WAILNEIHI	9	Q812G0-2|MGT4A_MOUSE:Q812G0|MGT4A_MOUSE		1	1
B16-F10	WAVSNREML	9	Q80YQ8|RMD5A_MOUSE		1	1
B16-F10	WGVENGVPYWL	11	P10605|CATB_MOUSE		1	1
B16-F10	WKVVNPYYL	9	Q5EG47|AAPK1_MOUSE	1	1	2
B16-F10	WVLVNEKPL	9	Q9ESY9|GILT_MOUSE	1	1	2
B16-F10	YAGQFNQDYL	10	P97384|ANX11_MOUSE	1		1
B16-F10	YAGSNFPEHI	10	P61161|ARP2_MOUSE		1	1
B16-F10	YAIENVETNL	10	Q6P2B1|TNPO3_MOUSE	1	1	2
B16-F10	YAIKLFEEI	9	Q8K1H7|T11L2_MOUSE	1		1
B16-F10	YAIKNIHGV	9	P39054|DYN2_MOUSE		1	1
B16-F10	YAIVGLETI	9	Q6P1B1|XPP1_MOUSE	1	1	2
B16-F10	YALALISRI	9	Q99LE2|GP146_MOUSE		1	1
B16-F10	YALENFVENL	10	Q8VI75|IPO4_MOUSE	1	1	2
B16-F10	YALINFSVF	9	P55012|S12A2_MOUSE	1	1	2
B16-F10	YAMENTRQTI	10	Q60974-2|NCOR1_MOUSE:Q60974|NCOR1_MOUSE		1	1
B16-F10	YAPAPFLHIMPA	12	Q91VX2|UBAP2_MOUSE	1	1	2
B16-F10	YAPDNVWFI	9	Q80V94|AP4E1_MOUSE		1	1
B16-F10	YAPDSIYYL	9	Q9CU65|ZMYM2_MOUSE	1	1	2
B16-F10	YAPKGSSVVM	10	Q8R0X7|SGPL1_MOUSE		1	1
B16-F10	YAPSIGFPYSL	11	Q8BYK6|YTHD3_MOUSE	1	1	2
B16-F10	YAVGNHDFI	9	Q8BFV2|PCID2_MOUSE	1	1	2
B16-F10	YDALDVANKIGII	13	P62751|RL23A_MOUSE	1	1	2
B16-F10	YFSKFGEVVD	10	Q60668|HNRPD_MOUSE	1		1
B16-F10	YFTKFGEVVD	10	Q99020|ROAA_MOUSE	1		1
B16-F10	YGGGGQYFAKP	11	P49312|ROA1_MOUSE		1	1
B16-F10	YGGGNYGP	8	O88569|ROA2_MOUSE	1	1	2
B16-F10	YGIENEVFL	9	P16125|LDHB_MOUSE	1	1	2
B16-F10	YGIRNSLLI	9	P07742|RIR1_MOUSE	1	1	2
B16-F10	YGISNEKPEV	10	Q8K2T8|PAF1_MOUSE	1	1	2
B16-F10	YGLKNLTAL	9	Q9EQ32|BCAP_MOUSE	1	1	2
B16-F10	YGLLNVTKI	9	Q8C0D4|RHG12_MOUSE	1	1	2
B16-F10	YGNILKHVM	9	Q8R4R6|NUP53_MOUSE	1		1
B16-F10	YGPENTLPTL	10	Q5RJY2|G2E3_MOUSE	1	1	2
B16-F10	YGPMKSGNFGGS	12	O88569|ROA2_MOUSE	1		1
B16-F10	YGYSNRVVDLM	11	P16858|G3P_MOUSE	1	1	2
B16-F10	YKNVNQEVV	9	Q9Z2G9-2|HTAI2_MOUSE:Q9Z2G9|HTAI2_MOUSE		1	1
B16-F10	YKYLFIFSV	9	Q9D0I8|MRT4_MOUSE	1		1
B16-F10	YKYPSDLPYM	10	P81270|ERG_MOUSE	1	1	2
B16-F10	YLMKNADYF	9	Q3U2S4|OTUD5_MOUSE	1		1
B16-F10	YLVVNPNYL	9	P97311|MCM6_MOUSE	1	1	2
B16-F10	YMGPSQRPL	9	Q04888|SOX10_MOUSE		1	1
B16-F10	YMGTNIHSL	9	P49442|INPP_MOUSE		1	1
B16-F10	YMLANLTHL	9	Q9CR40|KLH28_MOUSE	1	1	2
B16-F10	YMPQNPCII	9	Q60972|RBBP4_MOUSE		1	1
B16-F10	YMPQNPHII	9	Q60973|RBBP7_MOUSE		1	1
B16-F10	YMSFLEGTA	9	Q99JT9|MTND_MOUSE	1		1
B16-F10	YMSVADEHL	9	Q3TH73-2|TTYH2_MOUSE:Q3TH73|TTYH2_MOUSE		1	1
B16-F10	YMTEGHLAM	9	Q61214|DYR1A_MOUSE		1	1
B16-F10	YMVEHQEYV	9	P52793|EFNA1_MOUSE		1	1
B16-F10	YNIAGWLDKNKD	12	Q5SX40|MYH1_MOUSE	1		1
B16-F10	YNIQKESTLHLVLR	14	P62983|RS27A_MOUSE:P62984|RL40_MOUSE:P0CG49|UBB_MOUSE:P0CG50|UBC_MOUSE	1		1
B16-F10	YNISLKEVM	9	Q8CHW4|EI2BE_MOUSE	1		1
B16-F10	YQFDKVGILTL	11	Q8BKT7|THOC5_MOUSE	1	1	2
B16-F10	YQKAPTKEFYA	11	P43407|SDC2_MOUSE	1		1
B16-F10	YQLENIQVL	9	P49025|CTRO_MOUSE	1	1	2
B16-F10	YQLLLKDFL	9	A2CG49|KALRN_MOUSE:Q0KL02|TRIO_MOUSE:Q9CWR0|ARHGP_MOUSE	1	1	2
B16-F10	YQLLLKELL	9	A2CG49|KALRN_MOUSE:A2CG49-7|KALRN_MOUSE:A2CG49-2|KALRN_MOUSE:Q0KL02-3|TRIO_MOUSE:Q0KL02|TRIO_MOUSE:Q0KL02-4|TRIO_MOUSE		1	1
B16-F10	YQLLLKEML	9	Q64096|MCF2L_MOUSE	1	1	2
B16-F10	YQLSNLYAI	9	Q6KAU4|MB12B_MOUSE		1	1
B16-F10	YQLVNSIFQHL	11	Q80SU7|GVIN1_MOUSE		1	1
B16-F10	YQNTNIVFL	9	P70170|ABCC9_MOUSE	1		1
B16-F10	YQQMNPEAL	9	P54841|MAFB_MOUSE		1	1
B16-F10	YQVANGMDFL	10	P05622|PGFRB_MOUSE		1	1
B16-F10	YQVENIVDTL	10	Q6ZQ73|CAND2_MOUSE	1		1
B16-F10	YQYENGAHM	9	P70325|TBX4_MOUSE	1	1	2
B16-F10	YQYLLVTAL	9	Q8R207|SPTSA_MOUSE	1		1
B16-F10	YQYTSPDFL	9	Q8BGI3|INSI1_MOUSE	1		1
B16-F10	YSGSYNDYL	9	Q8C2Q3|RBM14_MOUSE	1		1
B16-F10	YSHVDLVVM	9	P26638|SYSC_MOUSE	1		1
B16-F10	YSIQGQHTI	9	P60335|PCBP1_MOUSE		1	1
B16-F10	YSIQGQSVM	9	Q80TL7-2|MON2_MOUSE:Q80TL7|MON2_MOUSE		1	1
B16-F10	YSITNTEEL	9	Q52KR2|LRIG2_MOUSE		1	1
B16-F10	YSIVNASVL	9	Q9ERE3|SGK3_MOUSE	1		1
B16-F10	YSLEPVAAEL	10	P09411|PGK1_MOUSE	1		1
B16-F10	YSLGNTYTL	9	Q6IR34|GPSM1_MOUSE		1	1
B16-F10	YSLVNQQSF	9	Q8BU31|RAP2C_MOUSE:P61226|RAP2B_MOUSE:Q80ZJ1|RAP2A_MOUSE	1		1
B16-F10	YSPQNSDYLL	10	Q6PHU5|SORT_MOUSE	1		1
B16-F10	YSPTGKEFV	9	Q6PAC3|DCA13_MOUSE		1	1
B16-F10	YSVANHNSFL	10	Q9D3G9|RHOH_MOUSE		1	1
B16-F10	YSVLNSNDYF	10	Q9Z2Q2|KNOP1_MOUSE	1		1
B16-F10	YSVRNIFHL	9	O54692|ZW10_MOUSE	1	1	2
B16-F10	YTATNQDFI	9	Q80TM9-3|NISCH_MOUSE:Q80TM9-2|NISCH_MOUSE:Q80TM9|NISCH_MOUSE		1	1
B16-F10	YTIELLDTV	9	Q80U12|SGSM2_MOUSE	1	1	2
B16-F10	YTLGVKQLIVGVNK	14	P10126|EF1A1_MOUSE	1		1
B16-F10	YTLHNIDQL	9	Q80U44|ZFY16_MOUSE	1		1
B16-F10	YTVANKEYV	9	Q9DC16|ERGI1_MOUSE		1	1
B16-F10	YTVKNGDSL	9	Q3TLI0|TPC10_MOUSE		1	1
B16-F10	YTWDFGDGTGTLIS	14	Q60696|PMEL_MOUSE	1		1
B16-F10	YVEFTRSLFVN	11	P16546|SPTN1_MOUSE	1		1
B16-F10	YVGQAGTATL	10	P30999|CTND1_MOUSE	1		1
B16-F10	YVHVNATYV	9	P16056|MET_MOUSE	1	1	2
B16-F10	YVHVNRDTL	9	Q9JLV6|PNKP_MOUSE	1	1	2
B16-F10	YVLDDSD	7	P54818|GALC_MOUSE	1		1
B16-F10	YVLDDSDGLGREFD	14	P54818|GALC_MOUSE	1		1
B16-F10	YVLHNSNTM	9	Q8VDM4|PSMD2_MOUSE	1	1	2
B16-F10	YVQSMDVAAFNKI	13	O70251|EF1B_MOUSE	1		1
B16-F10	YVSQNKEFL	9	Q9D4H4-2|AMOL1_MOUSE:Q9D4H4|AMOL1_MOUSE		1	1
B16-F10	YVTTSTRTYSLGSA	14	P20152|VIME_MOUSE		1	1
B16-F10	YVVDNIDHL	9	Q9R1A8|RFWD2_MOUSE	1	1	2
B16-F10	YYPPSQIAQL	10	P29341|PABP1_MOUSE	1		1
