# Supplementary material for: Localized ablative immunotherapy drives de novo CD8+ T-cell responses to poorly immunogenic tumors
Source: HighWire-hosted journal article supplement (doi:10.1136/jitc-2022-004973), 2022-10-01
Supplement: jitc-2022-004973supp005_data_supplement.xlsx [file jitc-2022-004973supp005_data_supplement.xlsx]

## Sheet: Supplementary Table 4
Supplementary Table 4. list of all Kb peptides (8-9 aa) identified from B16-F10 tumors in this study and the previousely identified peptides in other C57BL/6 tumor-derived cell lines including EL4 (lymphoma) and GL261 (malignant glioma). Peptide sequence, length and accession of the peptides among different tumor cells have been shown. Note: Kb peptides from LLC1 tumor cells have not been previou…
Peptide	Length	Accession	B16-F101	B16-F102	EL42	GL2612	Total
AAFVFRKL	8	Q8K0S9|SNPC1_MOUSE		1	1	1	3
AAILFSERL	9	Q3KQJ0|TMM69_MOUSE			1		1
AAIRFKDL	8	Q7TQE6|MACOI_MOUSE			1		1
AALAAAEPA	9	Q8C0K5|GDC_MOUSE	1				1
AALDFKNV	8	Q8CG47|SMC4_MOUSE	1				1
AALEFLNRF	9	Q60864|STIP1_MOUSE			1	1	2
AALIYGKL	8	Q9DC23|DJC10_MOUSE			1		1
AALIYTSV	8	Q6PDL0|DC1L2_MOUSE:Q8R1Q8|DC1L1_MOUSE	1				1
AALLLARL	8	P51944|CCNF_MOUSE			1		1
AALRFLSQL	9	Q9D2N9|VP33A_MOUSE		1	1		2
AALRFQSL	8	Q7TSK2|SEZ6_MOUSE			1		1
AAPHFFHL	8	Q3U108|ARI5A_MOUSE		1	1	1	3
AAPRSFIFL	9	Q3UIK4|MET14_MOUSE		1	1		2
AAPSNLPYL	9	Q8BFV3|DUS4_MOUSE		1			1
AAVKFHNL	8	Q64521|GPDM_MOUSE		1	1	1	3
AAVVYHKL	8	Q9WTN3|SRBP1_MOUSE			1		1
AAYAYSAL	8	Q9CQ22|LTOR1_MOUSE	1				1
AAYEFTTL	8	P32233|DRG1_MOUSE	1	1	1		3
AAYGFRNI	8	Q9CYQ7|NARF_MOUSE		1	1	1	3
AAYIFGLGL	9	Q9D8V0|HM13_MOUSE:Q9D8V0-3|HM13_MOUSE:Q9D8V0-4|HM13_MOUSE	1				1
AAYSFYNV	8	O70310|NMT1_MOUSE	1	1		1	3
ACPEYSRL	8	B9EKI3|TMF1_MOUSE	1				1
AEYIYPSL	8	Q80TJ7|PHF8_MOUSE			1		1
AFFRFSGL	8	Q61542|STAR3_MOUSE				1	1
AFYKISTL	8	Q91YW3|DNJC3_MOUSE			1		1
AFYQFVNNL	9	Q9WTV7|RNF12_MOUSE		1	1	1	3
AFYRLISGL	9	Q8R180|ERO1A_MOUSE			1		1
AFYYIHNL	8	Q9QYC0|ADDA_MOUSE	1		1		2
AGFAFLTGV	9	Q9D2C7|BI1_MOUSE	1		1		2
AGFLFQKV	8	Q9DB70|FUND1_MOUSE			1		1
AGLVFLHL	8	Q9R049|AMFR_MOUSE			1		1
AGPTFNYL	8	Q01320|TOP2A_MOUSE	1		1		2
AGPWYRNL	8	P98195|ATP9B_MOUSE		1		1	2
AGYMYTQL	8	A2AN08|UBR4_MOUSE	1	1	1	1	4
AGYRFSLI	8	Q8VD37|SGIP1_MOUSE			1		1
AHWYFSQL	8	Q8BLY1|SMOC1_MOUSE			1		1
AHYTYNNL	8	Q8BZ00|SL9A9_MOUSE	1		1		2
AICIFREL	8	Q08943|SSRP1_MOUSE	1				1
AIFNFQSL	8	Q9CR64-2|KISHA_MOUSE:Q9CR64|KISHA_MOUSE	1	1	1	1	4
AIIAFKTL	8	Q8K4I3|ARHG6_MOUSE			1		1
AIIEYMPLL	9	Q76MZ3|2AAA_MOUSE			1		1
AIISFSLL	8	P01853|TCC1_MOUSE			1		1
AIITGFRNV	9	Q9Z1S0|BUB1B_MOUSE	1				1
AILERFPTI	9	P50652|FANCC_MOUSE		1	1	1	3
AILSFTSL	8	Q9WUF3|C8AP2_MOUSE	1				1
AIPEFMNL	8	Q9QXK3-4|COPG2_MOUSE	1	1	1		3
AIVEFLSNL	9	Q9D0N7|CAF1B_MOUSE	1	1			2
AIVEHLVTL	9	Q9Z1E3|IKBA_MOUSE			1	1	2
AIVERAAQL	9	P17932|RL32P_MOUSE			1		1
AIVQFTRTF	9	Q8C1Y8|CCZ1_MOUSE		1	1	1	3
AIVSFAHV	8	P43247|MSH2_MOUSE	1	1	1		3
AIYEFIHNF	9	Q9WVL1|AP4S1_MOUSE		1	1	1	3
AIYYFKANV	9	Q9JM76|ARPC3_MOUSE			1		1
AIYYFKIAV	9	Q8R429|AT2A1_MOUSE		1	1	1	3
ALLQYINL	8	Q91W96|APC4_MOUSE	1				1
ALLSFTSL	8	Q9QZI9|SERC3_MOUSE	1				1
ALYHFSSL	8	Q61457|CCNE1_MOUSE			1		1
ALYKFYLI	8	Q80V94|AP4E1_MOUSE			1		1
AMAPRTLLL	9	P01898|HA10_MOUSE		1	1	1	3
AMFRRKAFL	9	Q7TMM9|TBB2A_MOUSE		1			1
AMIELVERL	9	Q9QXA7|TRI44_MOUSE		1	1	1	3
AMQEFLTRL	9	O88738|BIRC6_MOUSE			1		1
AMYIFLHTV	9	Q9CQZ0|ORML2_MOUSE	1	1	1	1	4
AMYSFINAL	9	E9PV87|TALD3_MOUSE			1		1
AMYVHAYTL	9	O70435|PSA3_MOUSE			1		1
ANFPRATGL	9	P0CG14|CTF8A_MOUSE	1		1		2
ANFSFRNTL	9	P11344|TYRO_MOUSE	1	1			2
ANFTFPRL	8	Q3UHD6|SNX27_MOUSE		1	1	1	3
ANHRYANV	8	Q8R3B7|BRD8_MOUSE			1		1
ANINFPNL	8	Q6PDK2|MLL2_MOUSE			1	1	2
ANLIYYSL	8	Q91VR2|ATPG_MOUSE		1	1	1	3
ANLKFMTSM	9	Q8C6B9|AROS_MOUSE			1		1
ANPRLWLRL	9	Q8BH15|CNOTA_MOUSE			1		1
ANYDFYQLL	9	Q8VE18|SMG8_MOUSE		1	1	1	3
ANYEFSQV	8	P56528|CD38_MOUSE	1			1	2
ANYLYWYV	8	Q6PF93|PK3C3_MOUSE			1		1
ANYQRDGPM	9	P24270|CATA_MOUSE			1		1
ANYVFLYHL	9	Q8K0H1|S47A1_MOUSE				1	1
AQFKFTVL	8	P50580-2|PA2G4_MOUSE:P50580|PA2G4_MOUSE	1		1	1	3
AQIDHYLGL	9	Q99P72|RTN4_MOUSE			1	1	2
AQIRFSNI	8	P80315|TCPD_MOUSE			1		1
AQYKFIYV	8	P29351|PTN6_MOUSE	1	1	1	1	4
AQYLFIQTF	9	Q91YK2|RRP1B_MOUSE		1	1	1	3
AQYNFILV	8	Q8BLY2|SYTC2_MOUSE		1	1	1	3
AQYRFIYM	8	P35235|PTN11_MOUSE		1	1	1	3
AQYSFDKL	8	Q8C547|HTR5B_MOUSE		1	1	1	3
ASFIFRQL	8	Q8CEE6|PASK_MOUSE		1	1	1	3
ASITFEHM	8	Q91WK2|EIF3H_MOUSE			1		1
ASLFYQRL	8	Q8BHR8|CK049_MOUSE			1		1
ASLRFVFL	8	Q99L90|MCRS1_MOUSE	1		1		2
ASLVFPLL	8	Q3TXU5|DHYS_MOUSE			1		1
ASNVTNKTD	9	Q9Z204|HNRPC_MOUSE	1				1
ASPEFTKL	8	Q3TJZ6|FA98A_MOUSE	1		1		2
ASPIFTHV	8	Q8C5N3-2|CWC22_MOUSE:Q8C5N3|CWC22_MOUSE	1	1	1	1	4
ASPVFARL	8	O54828|RGS9_MOUSE			1		1
ASSPKFSEL	9	A2AGT5|CKAP5_MOUSE	1				1
ASVEFLMTV	9	Q5H8C4|VP13A_MOUSE				1	1
ASVKFHVL	8	Q6PDQ2|CHD4_MOUSE			1		1
ASYEFQREF	9	Q8BHE8|CB047_MOUSE			1		1
ASYEFTTL	8	Q9QXB9|DRG2_MOUSE	1	1	1	1	4
ASYEFVQRL	9	Q9JHU4|DYHC1_MOUSE	1	1	1	1	4
ASYLFRGL	8	Q7TN60|TMC6_MOUSE	1	1	1		3
ASYLLAAL	8	P99027|RLA2_MOUSE	1		1		2
ASYNHPVL	8	Q6NZM9|HDAC4_MOUSE			1		1
ASYTYLSL	8	P49945|FRIL2_MOUSE:P29391|FRIL1_MOUSE	1				1
ASYVYLSM	8	P09528|FRIH_MOUSE:Q9D5H4|FTMT_MOUSE	1				1
ATFDFSQYM	9	P43247|MSH2_MOUSE		1	1	1	3
ATFEFTANV	9	B1AVY7|KI16B_MOUSE		1		1	2
ATFEKESVM	9	P51912|AAAT_MOUSE	1				1
ATFEYSFI	8	Q9CY50|SSRA_MOUSE		1			1
ATFHFRTL	8	O08915|AIP_MOUSE			1		1
ATFPFAML	8	O35316|SC6A6_MOUSE	1				1
ATFVFNVF	8	Q8BNY6|NCS1_MOUSE				1	1
ATGYYPRF	8	Q60841|RELN_MOUSE				1	1
ATIRVTNL	8	Q9Z1D1|EIF3G_MOUSE	1				1
ATKYFTNRL	9	Q9JIM1|S29A1_MOUSE			1		1
ATLAYTKL	8	Q8BUR4-2|DOCK1_MOUSE:Q8BUR4|DOCK1_MOUSE	1				1
ATLEFTQL	8	P29477|NOS2_MOUSE	1				1
ATLVFHNL	8	P42227|STAT3_MOUSE	1	1	1	1	4
ATLVFHQL	8	Q9R1M5|NALP5_MOUSE			1		1
ATMLFAEL	8	O88545|CSN6_MOUSE			1		1
ATPRFSGL	8	Q8BFR5|EFTU_MOUSE			1		1
ATQQFQQL	8	P11370|ENV2_MOUSE	1				1
ATQVYPKL	8	Q8K3W0|BABA2_MOUSE	1				1
ATRSFPQL	8	Q07076|ANXA7_MOUSE	1		1		2
ATVSYANL	8	Q62371|DDR2_MOUSE	1				1
ATYGGIALL	9	Q78IK2|USMG5_MOUSE			1		1
ATYIFLQTF	9	Q8K1A5|TM41B_MOUSE	1	1	1	1	4
ATYIFNGL	8	Q9QXK3|COPG2_MOUSE	1	1	1		3
ATYIWKNNF	9	P70312|HAS2_MOUSE				1	1
ATYNFAVL	8	P60202|MYPR_MOUSE				1	1
ATYQFHPNL	9	Q80XQ2|TBCD5_MOUSE			1		1
ATYSYKEAL	9	Q8R349|CDC16_MOUSE	1		1	1	3
ATYTFIQQL	9	Q9R0N0|GALK1_MOUSE	1	1	1	1	4
AVFQYRLV	8	Q8BIZ6|SNIP1_MOUSE			1		1
AVFRFKVL	8	Q9DCI3|MENTO_MOUSE		1	1	1	3
AVFTFEQL	8	Q3UW53|NIBAN_MOUSE	1				1
AVFTWTNL	8	Q3UH60-2|DIP2B_MOUSE:Q8BWT5|DIP2A_MOUSE:Q3UH60|DIP2B_MOUSE	1				1
AVIHFAGL	8	Q8R059|GALE_MOUSE			1		1
AVIIFTGL	8	Q8VE96|S35F6_MOUSE	1				1
AVIKFLEL	8	P43247|MSH2_MOUSE	1	1	1	1	4
AVIQFLERI	9	Q571H0|NPA1P_MOUSE		1	1	1	3
AVIRFESI	8	Q3TDQ1|STT3B_MOUSE		1	1		2
AVLDFISSL	9	Q3TQQ9|CA112_MOUSE		1	1	1	3
AVLKYYKV	8	P62983|RS27A_MOUSE		1	1		2
AVLQFLTSL	9	P98192|GNPAT_MOUSE			1		1
AVLRYTKL	8	Q9WUK4|RFC2_MOUSE		1	1	1	3
AVLSFHNI	8	Q99P81|ABCG3_MOUSE			1		1
AVLSFSTRL	9	P46978|STT3A_MOUSE	1	1	1	1	4
AVPIFIEL	8	Q60960|IMA1_MOUSE		1	1	1	3
AVVAFVMKM	9	P01901|HA1B_MOUSE			1		1
AVVEFLTSV	9	Q5HZJ0|RNC_MOUSE	1	1	1	1	4
AVVEFSRNV	9	P70698|PYRG1_MOUSE	1		1	1	3
AVVRFINRF	9	Q6ZPE2|MTMR5_MOUSE		1	1		2
AVVRFNQYF	9	Q9D4V0|EKI1_MOUSE			1	1	2
AVYAFLGL	8	Q9JJU8|SH3L1_MOUSE	1				1
AVYDFFQV	8	Q80Z71|TENN_MOUSE			1		1
AVYIHALL	8	Q80U56|AVL9_MOUSE		1	1		2
AVYPFAAV	8	Q3UQ44|IQGA2_MOUSE			1		1
AVYQFGSAL	9	Q80ZE4|PAQR7_MOUSE	1		1		2
AVYSFEAL	8	Q99KC8|VMA5A_MOUSE	1		1		2
AVYTFETL	8	Q8R1F1|NIBL1_MOUSE	1	1		1	3
AVYTFETLL	9	Q8R1F1|NIBL1_MOUSE	1	1		1	3
AVYTYLRL	8	Q7TPD0|INT3_MOUSE		1	1	1	3
AWIKVEQL	8	Q922P9|GLYR1_MOUSE	1				1
AWYQKQELL	9	Q6NXY1|WDR67_MOUSE				1	1
AYFTHSNL	8	Q8CIE6|COPA_MOUSE			1		1
DAFVFSHL	8	P47802|MTX1_MOUSE			1		1
EAYRFTGL	8	Q8K015-2|CENPO_MOUSE:Q8K015|CENPO_MOUSE	1	1	1	1	4
EIVTFERL	8	Q61584-2|FXR1_MOUSE:Q61584-5|FXR1_MOUSE:Q61584-6|FXR1_MOUSE:Q61584-4|FXR1_MOUSE:Q61584-7|FXR1_MOUSE:Q61584-3|FXR1_MOUSE:Q61584|FXR1_MOUSE	1				1
EIYEFHKM	8	Q09014|NCF1_MOUSE	1				1
EIYSFSESL	9	P27641|XRCC5_MOUSE			1		1
ELFPVFTQL	9	Q99KU6-2|CF089_MOUSE:Q99KU6|CF089_MOUSE	1				1
ENYNFLLQL	9	Q920B9|SP16H_MOUSE			1		1
ENYSFEEL	8	Q7TPH6|MYCB2_MOUSE			1		1
ERPTYTNL	8	P68368|TBA4A_MOUSE:P68373|TBA1C_MOUSE:Q9JJZ2|TBA8_MOUSE:P05214|TBA3_MOUSE:P05213|TBA1B_MOUSE:P68369|TBA1A_MOUSE	1				1
ESFPGFVNL	9	Q6ZWR6-4|SYNE1_MOUSE:Q6ZWR6|SYNE1_MOUSE	1				1
ESFQFYDRL	9	Q8K284|TF3C1_MOUSE			1		1
ESFSDYPPL	9	P10126|EF1A1_MOUSE			1	1	2
ESPLFNNV	8	Q9CQ80-2|VPS25_MOUSE:Q9CQ80|VPS25_MOUSE	1				1
ESYSFEARM	9	Q9CQG3|ZMY19_MOUSE			1		1
ETPVYANL	8	P15066|JUND_MOUSE	1				1
ETYKYFSL	8	Q9ET30|TM9S3_MOUSE				1	1
EVFEFLQQV	9	Q2EMV9|PAR14_MOUSE		1			1
EVFRFYKL	8	Q8BH44|COR2B_MOUSE			1		1
EVYLFERI	8	P97390|VPS45_MOUSE			1		1
FAGVYFEKV	9	Q61420|S35A1_MOUSE			1		1
FAPIYADL	8	Q9D710|TMX2_MOUSE		1	1	1	3
FAYRFSNL	8	Q8BU03|PWP2_MOUSE	1	1	1	1	4
FAYRFSNLL	9	Q8BU03|PWP2_MOUSE		1	1		2
FIIVFEHL	8	A2AHL1|ANO3_MOUSE		1			1
FKYGHFSL	8	Q99LV7|PIGX_MOUSE			1		1
FNYGFEYL	8	Q9JHU4|DYHC1_MOUSE		1			1
FNYRYFEV	8	P36552|HEM6_MOUSE		1			1
FQFIFASM	8	Q6NZJ6-2|IF4G1_MOUSE:Q6NZJ6|IF4G1_MOUSE	1				1
FQFTFKHL	8	Q9QYJ0|DNJA2_MOUSE			1		1
FQIVNPHLL	9	P07742|RIR1_MOUSE	1				1
FQYIFEGL	8	O35382|EXOC4_MOUSE		1	1		2
FSAEVQLIH	9	O70354|CAH11_MOUSE	1				1
FSLEYPTI	8	Q61189|ICLN_MOUSE			1		1
FSPRFVAL	8	Q9DBY1|SYVN1_MOUSE			1		1
FSYFPYPSL	9	Q80W88|HOMEZ_MOUSE		1	1		2
FSYLNPQEL	9	Q8C2S5|FBXL5_MOUSE		1			1
FSYVRNLV	8	P70444|BID_MOUSE			1		1
FTFEYRYL	8	Q8K0V4|CNOT3_MOUSE		1	1		2
FTFQFNNL	8	Q8R5H1|UBP15_MOUSE		1	1	1	3
FTYDYHTL	8	Q9Z239|PLM_MOUSE				1	1
FTYRYLAL	8	Q920Q4|VPS16_MOUSE		1	1		2
FVFPLSHL	8	Q9CRD4|DBND2_MOUSE		1		1	2
FVQPFLNRL	9	Q6PD26|PIGS_MOUSE			1		1
FVWTHYYSV	9	P07147|TYRP1_MOUSE		1			1
FVYIFQEV	8	Q99K51|PLST_MOUSE		1		1	2
FVYTYKLV	8	Q921M3|SF3B3_MOUSE			1		1
FVYVFHTL	8	Q99P91|GPNMB_MOUSE	1	1	1	1	4
GFDYKERL	8	Q60598|SRC8_MOUSE	1				1
GKIGVKFNV	9	Q9CS84|NRX1A_MOUSE:P0DI97|NRX1B_MOUSE	1				1
GMYIFLHTV	9	Q9CPZ6|ORML3_MOUSE			1	1	2
GNIVFVTL	8	Q8BHB4|WDR3_MOUSE			1		1
GNYEYRLI	8	Q62083|PICK1_MOUSE			1		1
GNYKWINYL	9	Q9QUJ7|ACSL4_MOUSE			1	1	2
GNYLFHYI	8	P70280|VAMP7_MOUSE			1		1
GNYNFFNL	8	Q8C3X8|LMF2_MOUSE		1	1	1	3
GNYNFFNLL	9	Q8C3X8|LMF2_MOUSE			1		1
GPGGGYGA	8	Q07563|COHA1_MOUSE	1				1
GPGGVTGI	8	P54320|ELN_MOUSE	1				1
GQYEFHSL	8	Q61805|LBP_MOUSE	1			1	2
GSLLFIGRL	9	P19324|SERPH_MOUSE		1			1
GSYLHPSL	8	Q3USH5|SFSWA_MOUSE			1		1
GTFQRSAGL	9	P0CG14|CTF8A_MOUSE			1		1
GTYEFLYTV	9	Q9ESN6|TRIM2_MOUSE		1	1	1	3
GVFRFLSNL	9	Q52KR2|LRIG2_MOUSE			1		1
GVFSFSRL	8	Q8BMD6|CN101_MOUSE		1	1	1	3
GVFSFVNTL	9	Q8C7N7|APH1B_MOUSE		1	1		2
GVLKFARL	8	O35127|C10_MOUSE		1	1		2
GVLRFVNL	8	Q3UGP8|AG10B_MOUSE		1	1	1	3
GYTLLAAI	8	Q9EP89|LACTB_MOUSE	1				1
HGYIFSSL	8	Q9DAA6|EXOS1_MOUSE			1		1
HGYTFANL	8	Q9R1T2-2|SAE1_MOUSE:Q9R1T2|SAE1_MOUSE	1	1	1		3
HILAFYNL	8	Q9Z2G6|SE1L1_MOUSE			1		1
HIYEFPQL	8	Q8C4B4|U119B_MOUSE		1	1	1	3
HIYQFEYM	8	Q8C079|FA40A_MOUSE		1	1		2
HQYIFSHI	8	Q8R418|DICER_MOUSE			1		1
HQYQFNNL	8	P05555-2|ITAM_MOUSE:P05555|ITAM_MOUSE	1				1
HSIRFVTL	8	Q91XU0|WRIP1_MOUSE			1		1
HTFLYEKL	8	Q9ERY9|ERG28_MOUSE			1		1
HTFTYTGL	8	A2AGH6|MED12_MOUSE				1	1
HTYDFEKL	8	P07742|RIR1_MOUSE		1	1		2
IAAGGSLL	8	P70207|PLXA2_MOUSE	1				1
IAFGFHQL	8	Q9R0A0|PEX14_MOUSE			1		1
IAFIFNNL	8	Q6ZQ08|CNOT1_MOUSE	1	1	1		3
IAFKHLFL	8	Q8R4F0|MCLN3_MOUSE		1			1
IAFRFLSYV	9	Q9CXI0|COQ5_MOUSE		1	1		2
IAGPYNRL	8	Q8VDJ3|VIGLN_MOUSE			1		1
IALAFHLL	8	Q91WC0|SETD3_MOUSE			1		1
IALFFRSL	8	Q8R3L2|TCF25_MOUSE		1	1		2
IALRYVAL	8	Q9JIF7|COPB_MOUSE	1		1		2
IAMEFNHL	8	P22437|PGH1_MOUSE		1	1		2
IAPIYKKL	8	Q4JK59|TET2_MOUSE		1	1		2
IAPSFVKGF	9	O88967|YMEL1_MOUSE		1	1	1	3
IAPTLLQAL	9	P19096|FAS_MOUSE			1		1
IATEFNQL	8	Q921L5|COG2_MOUSE			1		1
IAVAYHNI	8	Q8BGZ4|CDC23_MOUSE			1		1
IAVQFVDM	8	Q61753|SERA_MOUSE			1		1
IAVSFREL	8	Q8BJW5-2|NOL11_MOUSE:Q8BJW5|NOL11_MOUSE	1	1	1	1	4
IAWGYPNL	8	P14148|RL7_MOUSE			1		1
IAYAFFHL	8	Q8K4P7-3|ST7L_MOUSE:Q99M96-7|ST7_MOUSE:Q99M96-9|ST7_MOUSE:Q99M96-4|ST7_MOUSE:Q99M96-6|ST7_MOUSE:Q99M96-8|ST7_MOUSE:Q99M96-5|ST7_MOUSE:Q99M96-3|ST7_MOUSE:Q8K4P7|ST7L_MOUSE:Q99M96-2|ST7_MOUSE:Q99M96|ST7_MOUSE	1	1	1	1	4
IAYEFVEM	8	P03958|ADA_MOUSE		1	1		2
IAYGYNNI	8	Q9WUA2|SYFB_MOUSE			1		1
IAYKFGKTV	9	Q8R3Q0|SARAF_MOUSE			1		1
IAYLYDRL	8	Q9CZ15|PSF1_MOUSE		1	1		2
IAYLYNEGL	9	P51944|CCNF_MOUSE			1		1
IAYQFLRA	8	Q8CG48|SMC2_MOUSE		1	1		2
ICFKFDHL	8	P47754|CAZA2_MOUSE	1				1
IDFDFTHL	8	O70566|DIAP2_MOUSE			1		1
IDFGFARL	8	Q9Z2B9|KS6A4_MOUSE			1		1
IDYQYQLL	8	Q9D8X5|CNOT8_MOUSE			1		1
IDYSFPSL	8	Q91VE6|MK67I_MOUSE		1	1	1	3
IFYFVNKL	8	Q8BH24|TM9S4_MOUSE		1			1
IFYYVQKL	8	Q69ZR2|HECD1_MOUSE	1		1		2
IGAEVYHNL	9	P17182|ENOA_MOUSE	1				1
IGFSYSVNL	9	Q9D6J1|CERS4_MOUSE			1		1
IGIVKQAGL	9	Q9Z2X1|HNRPF_MOUSE	1		1		2
IGLAYVNHL	9	Q5KU39|VPS41_MOUSE		1	1	1	3
IGLLYIRL	8	Q8VIH9|UR2R_MOUSE		1	1		2
IGPDFQKGL	9	Q08093|CNN2_MOUSE		1	1		2
IGPRFSNL	8	P46460|NSF_MOUSE		1	1	1	3
IGPRFVLNL	9	Q9DCA5|BRX1_MOUSE		1	1		2
IGPRYSSV	8	Q5PRF0|HTR5A_MOUSE			1		1
IGPTYYQRL	9	Q8CFI7|RPB2_MOUSE	1	1	1		3
IGYAFVHL	8	C3VPR6-2|NLRC5_MOUSE:C3VPR6|NLRC5_MOUSE	1				1
IGYEHEVL	8	Q3U4G0|CO041_MOUSE			1		1
IGYPFLVSV	9	Q3UJD6|UBP19_MOUSE		1	1	1	3
IHVDFSQSV	9	Q9CXG3|PPIL4_MOUSE			1		1
IHYDRITSL	9	Q8CFQ3|AQR_MOUSE			1		1
IHYEAPLL	8	Q80TG1|KANL1_MOUSE			1		1
IHYFFSKL	8	P58021|TM9S2_MOUSE		1	1		2
IHYGSGSL	8	P18242|CATD_MOUSE			1		1
IIAFFAHL	8	Q8CHI8|EP400_MOUSE			1		1
IIALFHLL	8	P61620|S61A1_MOUSE		1	1		2
IIFNHSNKL	9	Q63943|MEF2D_MOUSE			1		1
IIGTFERM	8	Q9EQH3|VPS35_MOUSE			1		1
IIITFNDL	8	Q9JI78|NGLY1_MOUSE			1		1
IIIVFRAL	8	Q8CFI7|RPB2_MOUSE		1			1
IILDALPQL	9	Q8C147|DOCK8_MOUSE			1		1
IILIFQTGL	9	Q6P7W0|SENP6_MOUSE		1	1		2
IILKNFEKL	9	P97371|PSME1_MOUSE			1		1
IILKYIGM	8	Q9JKW0|AR6P1_MOUSE	1	1	1		3
IINTFKNL	8	P0C5E4|PTPRQ_MOUSE		1			1
IIPMFSNL	8	Q76MZ3|2AAA_MOUSE	1	1	1		3
IISTFQNL	8	Q6DID3|SCAF8_MOUSE	1		1		2
IITGFRNV	8	Q9Z1S0|BUB1B_MOUSE	1				1
IIVQFRYI	8	Q8BHK1|NIPA1_MOUSE		1		1	2
IIYDRKFLM	9	Q60876|4EBP1_MOUSE		1	1		2
IIYIFYQKL	9	Q9EQ16|CXCR6_MOUSE			1		1
IIYNPKNL	8	Q9D554|SF3A3_MOUSE			1	1	2
IIYPPPEV	8	Q8K4Z5|SF3A1_MOUSE	1				1
IIYQYFEI	8	P61620|S61A1_MOUSE		1			1
IIYQYFEIF	9	P61620|S61A1_MOUSE		1			1
IIYRFLTL	8	Q9D4H2|GCC1_MOUSE			1		1
IIYTFPVL	8	Q8VDB2|ALG12_MOUSE	1	1	1		3
IIYVFYQM	8	P70188|KIFA3_MOUSE		1	1		2
IIYVFYQMV	9	P70188|KIFA3_MOUSE			1		1
ILSSFESRL	9	O35250|EXOC7_MOUSE		1	1		2
ILWPFTRL	8	Q60664|LRMP_MOUSE			1		1
IMIALPSL	8	P00405|COX2_MOUSE		1	1		2
IMYDKHIQM	9	Q80SU7|GVIN1_MOUSE	1				1
IMYNVTEL	8	Q3TIR1|CE044_MOUSE			1		1
INAARGLGL	9	P43247|MSH2_MOUSE			1		1
INAEFVTQL	9	Q8CFQ3|AQR_MOUSE			1		1
INFDFHQF	8	Q9D2G5|SYNJ2_MOUSE			1		1
INFDFNTI	8	Q8CDD8|KCD20_MOUSE	1	1	1	1	4
INFDFPKL	8	P54823|DDX6_MOUSE	1	1	1	1	4
INFIISQV	8	A2AGT5|CKAP5_MOUSE			1		1
INFYAGAFL	9	O88410|CXCR3_MOUSE		1	1	1	3
INIEHALTF	9	Q6ZWQ0|SYNE2_MOUSE		1	1		2
INIEMYQRL	9	Q8R4C2|RUFY2_MOUSE		1	1		2
INLFFTEL	8	Q7TT37|ELP1_MOUSE			1		1
INLIFRYL	8	P62305|RUXE_MOUSE		1	1	1	3
INLIYGTI	8	Q8BSU7|MOB3A_MOUSE			1		1
INLNYKDL	8	Q9CY50|SSRA_MOUSE		1			1
INLTFLDL	8	Q62192|CD180_MOUSE	1				1
INQIYEARV	9	Q8K2H4|ACAP1_MOUSE			1		1
INQRFEEL	8	P42230|STA5A_MOUSE			1		1
INTEFKNT	8	P20152|VIME_MOUSE	1				1
INVELSLL	8	P51410|RL9_MOUSE			1		1
INVFFYTV	8	Q8K358|PIGU_MOUSE			1		1
INVHTVNL	8	Q91YU8|SSF1_MOUSE			1		1
INVWHDVGL	9	P58742|AAAS_MOUSE			1		1
INVYFNAF	8	Q64310|SURF4_MOUSE			1		1
INYDFPPTL	9	Q9CWT6|DDX28_MOUSE			1		1
INYILRVL	8	Q7TMY8|HUWE1_MOUSE			1		1
INYSYINL	8	B1AY13|UBP24_MOUSE	1	1	1		3
INYVVAHV	8	P24063|ITAL_MOUSE			1		1
INYVVPRV	8	Q80U59|K0232_MOUSE			1		1
IQFSFKEKL	9	Q8BL99|DOP1_MOUSE			1		1
IQLEFREL	8	A2AJ15|MA1B1_MOUSE		1		1	2
IQLLYSRV	8	Q5H8C4|VP13A_MOUSE			1		1
IQLTHVQT	8	O08573|LEG9_MOUSE	1				1
IQQHFSATL	9	Q8C3J5|DOCK2_MOUSE			1		1
IQWAFKNL	8	Q6ZQ93|UBP34_MOUSE		1	1		2
IQWRFVNRI	9	P46935|NEDD4_MOUSE		1	1	1	3
IQWRFVNRV	9	Q8CFI0|NED4L_MOUSE		1			1
IRYIFAYL	8	Q9JHF7|HPGDS_MOUSE	1	1	1		3
ISARFVQL	8	Q812E0|CPEB2_MOUSE		1	1		2
ISFEFRSL	8	Q3THF9|CQ10B_MOUSE	1	1	1	1	4
ISFEFRSLL	9	Q3THF9|CQ10B_MOUSE		1	1	1	3
ISFKFDHL	8	P47753|CAZA1_MOUSE	1	1	1	1	4
ISFKWAFL	8	Q9D8M3|HRG1_MOUSE	1	1	1		3
ISILYHQL	8	Q9D2V5|AAR2_MOUSE	1		1		2
ISLDYHQL	8	Q7TPV2|DZIP3_MOUSE			1		1
ISLDYQHL	8	Q5SYL3|K0100_MOUSE			1		1
ISLEFRNL	8	P53798|FDFT_MOUSE	1	1	1	1	4
ISLEGKPL	8	P18760|COF1_MOUSE	1				1
ISLEYSEL	8	Q3U319|BRE1B_MOUSE	1				1
ISLQFVRL	8	Q8VII8|MCR_MOUSE			1		1
ISLRFTHL	8	Q6P549|SHIP2_MOUSE		1	1		2
ISLSYSRI	8	P14685|PSMD3_MOUSE			1		1
ISPGDFPNL	9	Q9QXY6|EHD3_MOUSE			1		1
ISPRFDVQL	9	P62245|RS15A_MOUSE	1	1	1		3
ISRTFPNL	8	Q8CGA2|TBC14_MOUSE	1				1
ISSLFSSL	8	Q60603|KCNH1_MOUSE	1				1
ISSRFQNL	8	Q9QXZ0|MACF1_MOUSE			1		1
ISTIFKSL	8	Q9ES00|UBE4B_MOUSE			1		1
ISTSFPNL	8	Q6ZWQ0|SYNE2_MOUSE			1		1
ISVRFHNL	8	Q8CFL8|ZSWM3_MOUSE		1	1		2
ISVSFYHV	8	Q8JZQ9|EIF3B_MOUSE		1	1		2
ISYDRFLS	8	P58406|HRH3_MOUSE			1		1
ISYEFKFPF	9	Q8C0T5|SI1L1_MOUSE		1	1		2
ISYIHALI	8	P97929|BRCA2_MOUSE			1		1
ISYLYNKL	8	Q9JM55|TOB2_MOUSE:Q61471|TOB1_MOUSE	1	1	1	1	4
ISYNFIEKL	9	Q05A62-3|DNAL1_MOUSE:Q05A62-2|DNAL1_MOUSE:Q05A62|DNAL1_MOUSE	1	1	1	1	4
ISYQFSNL	8	Q99PQ1|TR12A_MOUSE	1	1	1	1	4
ITFIFKSL	8	Q9JLN9|MTOR_MOUSE	1	1	1	1	4
ITFSYVNNM	9	Q8C172|CERS6_MOUSE				1	1
ITGMFQRL	8	Q9D8N0|EF1G_MOUSE			1		1
ITGRFAQI	8	P62077|TIM8B_MOUSE			1		1
ITGYFPSM	8	Q09014|NCF1_MOUSE	1				1
ITHRFTHL	8	Q9ES52|SHIP1_MOUSE			1		1
ITYAWTRL	8	Q6P8H8|ALG8_MOUSE		1			1
IVDTFLQKL	9	Q9CPV5|PMF1_MOUSE			1		1
IVFEDFARL	9	Q91YI4|ARRB2_MOUSE:Q91YI4-2|ARRB2_MOUSE	1	1	1		3
IVIKFRYL	8	Q3TDN0|DISP1_MOUSE		1			1
IVLTFEYL	8	P05132|KAPCA_MOUSE		1			1
IVLTFRQL	8	Q8BGF9|S2544_MOUSE		1	1		2
IVPLFTNL	8	Q7TNP2|2AAB_MOUSE	1		1		2
IVVNLTGRL	9	P62245|RS15A_MOUSE		1			1
IVVSLQSKL	9	Q8K1E0|STX5_MOUSE			1		1
IVWEFEQL	8	Q62158|TRI27_MOUSE	1	1	1		3
IVYTFMTHF	9	Q6ZQ93|UBP34_MOUSE		1	1		2
IWIRVASL	8	Q8BRG6|KLH24_MOUSE	1	1	1		3
IWISKLPHF	9	Q8K1H1|TDRD7_MOUSE			1		1
IWITAAKL	8	Q91YR7|PRP6_MOUSE			1		1
IWLFQANL	8	Q9D2C7|BI1_MOUSE			1		1
IYFDHTISV	9	Q8VHQ9|ACO11_MOUSE			1		1
KAFDFYKV	8	P13405|RB_MOUSE			1		1
KAFTYINL	8	Q62351|TFR1_MOUSE	1	1	1	1	4
KAFVFSVAL	9	Q9CR55|CP087_MOUSE			1		1
KAFWYGQL	8	Q8BWY7|S39AB_MOUSE			1		1
KALEYLKL	8	A2AGT5|CKAP5_MOUSE			1		1
KALINADEL	9	P16546-2|SPTN1_MOUSE:P16546|SPTN1_MOUSE	1				1
KALLFVNTL	9	Q9D0R4|DDX56_MOUSE		1	1		2
KAPEYLHRF	9	P97379|G3BP2_MOUSE			1		1
KAPGFAQM	8	P42932|TCPQ_MOUSE	1				1
KAVDFTTV	8	Q9DBQ9|SWT1_MOUSE			1		1
KAYIFEGAL	9	Q78T54|VMA21_MOUSE		1	1		2
KAYQYTTL	8	Q8BGK5|S35F1_MOUSE				1	1
KAYRFLFGF	9	Q5XKN4|JAGN1_MOUSE		1			1
KGEGPAST	8	Q810U4|NRCAM_MOUSE	1				1
KGFDFTLM	8	P42209|SEPT1_MOUSE			1		1
KGFEFTLM	8	P42208|SEPT2_MOUSE			1	1	2
KGFTFSAL	8	Q9CYV5|TM135_MOUSE		1	1		2
KGFYFAKL	8	Q9ERU9|RBP2_MOUSE		1	1	1	3
KGLDFALL	8	Q9Z1M8|RED_MOUSE		1	1		2
KGLRFIQL	8	Q9R1S8|CAN7_MOUSE		1	1	1	3
KGYAYTFI	8	Q569Z5|DDX46_MOUSE		1	1		2
KGYIFLTL	8	Q80VI1|TRI56_MOUSE		1	1	1	3
KGYLFNTV	8	P48964|MPIP1_MOUSE		1	1		2
KGYRFIFL	8	P59016|VP33B_MOUSE		1			1
KGYVFKEL	8	P58681|TLR7_MOUSE	1				1
KIFEFKETL	9	Q8BW96-2|KCC1D_MOUSE:Q8BW96|KCC1D_MOUSE	1		1	1	3
KIIDFLSAL	9	P54276|MSH6_MOUSE		1	1		2
KIIEFANI	8	Q61884|MNS1_MOUSE	1		1		2
KIITYRNL	8	Q8BFV2|PCID2_MOUSE	1	1	1		3
KILEWFASI	9	O09117|SYPL1_MOUSE		1	1		2
KILPWFEQL	9	Q8BIV3|RNBP6_MOUSE		1	1		2
KILTFDQL	8	P35980|RL18_MOUSE	1	1	1	1	4
KIQSFINRM	9	Q8C1Y8|CCZ1_MOUSE	1	1	1	1	4
KIVEFLQSF	9	O55143|AT2A2_MOUSE		1	1	1	3
KIVPFFKL	8	Q9JHU4|DYHC1_MOUSE		1	1	1	3
KIVQFIVTL	9	P38533|HSF2_MOUSE		1	1	1	3
KIVVLLQRL	9	P97371|PSME1_MOUSE			1		1
KIYEFDYHL	9	O70157|TOP3A_MOUSE			1		1
KIYQWINEL	9	Q9JKY0|CNOT9_MOUSE	1	1	1	1	4
KIYYFAAV	8	Q6PB44|PTN23_MOUSE		1	1	1	3
KMITFIDL	8	Q3UJK4|GTPB2_MOUSE			1		1
KMYEFAGRL	9	Q8CHG5|K0317_MOUSE			1		1
KNAVFTQV	8	Q3U487|HECD3_MOUSE			1		1
KNFAFLEF	8	P26369|U2AF2_MOUSE		1	1	1	3
KNFKFLGTL	9	Q3UH06|RREB1_MOUSE			1		1
KNFVHRDL	8	P43404|ZAP70_MOUSE			1		1
KNHEFIATF	9	P28867|KPCD_MOUSE		1	1	1	3
KNIFYKAI	8	Q8K0C4|CP51A_MOUSE			1		1
KNIIYRFL	8	Q9D4H2|GCC1_MOUSE			1		1
KNIRFPLM	8	Q80TF4|KLH13_MOUSE		1	1	1	3
KNIRYVAL	8	P22892|AP1G1_MOUSE			1		1
KNLDWFPRM	9	Q9Z329|ITPR2_MOUSE		1	1		2
KNLEVFMHV	9	Q922J9|FACR1_MOUSE			1		1
KNLNYLHL	8	Q99PV0|PRP8_MOUSE		1	1		2
KNLRYQLL	8	Q8K310|MATR3_MOUSE	1	1	1		3
KNLVFVVGL	9	Q8BT14|CNOT4_MOUSE		1	1		2
KNVLFSHL	8	Q9DBC7|KAP0_MOUSE		1	1		2
KNVTFEHV	8	O88967|YMEL1_MOUSE			1		1
KNVVYERV	8	Q8K4L4|POF1B_MOUSE			1		1
KNVVYRDL	8	P31750|AKT1_MOUSE	1		1		2
KNWQFVENL	9	Q9CWY8|RNH2A_MOUSE		1	1		2
KNYDFAQV	8	Q8BGF7|PAN2_MOUSE			1		1
KNYDFAQVL	9	Q8BGF7|PAN2_MOUSE		1	1	1	3
KNYFFVISV	9	Q5XF89|AT133_MOUSE		1		1	2
KNYGFVHI	8	Q8VE92|RBM4B_MOUSE			1		1
KNYLLPIL	8	P50172|DHI1_MOUSE			1		1
KNYVLQTL	8	P70168|IMB1_MOUSE			1		1
KQFAFVHM	8	Q8C2Q3|RBM14_MOUSE			1		1
KQYGFFSYL	9	Q8CG46|SMC5_MOUSE			1		1
KQYSFEAL	8	Q5DU41|LRC8B_MOUSE			1	1	2
KSFDYGNL	8	Q3UHF7|ZEP2_MOUSE			1	1	2
KSFEWLSQM	9	Q9JHU4|DYHC1_MOUSE	1	1	1	1	4
KSFLFSAL	8	Q920L5|ELOV6_MOUSE		1	1	1	3
KSFVFSLL	8	P70213|FV1_MOUSE	1	1	1	1	4
KSITFSKL	8	O35459|ECH1_MOUSE	1		1		2
KSLERATQL	9	Q63829|COMD3_MOUSE			1		1
KSLEYHHL	8	Q80TB7-2|ZSWM6_MOUSE:Q80TB7|ZSWM6_MOUSE	1				1
KSLRFTQM	8	P09838|TDT_MOUSE			1		1
KSLWYKNL	8	Q8K4C2|I17RC_MOUSE		1			1
KSPDFYEEV	9	Q8C147|DOCK8_MOUSE			1		1
KSPEYESL	8	Q3V1L4|5NTC_MOUSE	1				1
KSVLFHTV	8	P70218|M4K1_MOUSE			1		1
KSYEFEDL	8	Q8C4S8|DEN2A_MOUSE				1	1
KSYERINNI	9	Q9Z121|CCL8_MOUSE	1				1
KSYLFQLL	8	P97377|CDK2_MOUSE	1	1	1	1	4
KSYLFRNAF	9	P56564|EAA1_MOUSE				1	1
KSYLMNKL	8	Q01514|GBP1_MOUSE		1			1
KSYLMNRL	8	Q61107|GBP4_MOUSE		1	1		2
KSYNFHTGL	9	Q8VE18|SMG8_MOUSE			1		1
KSYQVAPL	8	Q8K4R9|DLGP5_MOUSE			1		1
KSYSFDEV	8	Q99KQ4|NAMPT_MOUSE	1	1		1	3
KSYSFIARM	9	Q8CGZ0|CHERP_MOUSE		1	1	1	3
KTFKFQSNL	9	Q9QYE3|BC11A_MOUSE			1		1
KTFLFSATM	9	Q9CWX9|DDX47_MOUSE	1	1	1	1	4
KTFTFDTV	8	P28741|KIF3A_MOUSE			1		1
KTFVFDYV	8	Q6P9L6|KIF15_MOUSE			1		1
KTLLFFTAL	9	Q78T54|VMA21_MOUSE			1		1
KTLLFVRL	8	P47758|SRPRB_MOUSE		1	1		2
KTLNYTARF	9	Q9D7M8|RPB4_MOUSE			1		1
KTLRYNFL	8	Q6ZQH8|NU188_MOUSE		1	1		2
KTVCFQNL	8	Q7TMB8-2|CYFP1_MOUSE:Q7TMB8|CYFP1_MOUSE	1				1
KTWRFSNM	8	Q8CIB5|FERM2_MOUSE			1		1
KTWVFSFL	8	Q66K08|CILP1_MOUSE	1				1
KTYEHFNAM	9	P37040|NCPR_MOUSE			1		1
KTYQFLNDI	9	Q3UFY0|RRP36_MOUSE	1	1	1	1	4
KVAGFNLL	8	P01849|TCA_MOUSE			1		1
KVAVFRYL	8	E2JF22|PIEZ1_MOUSE			1		1
KVFEFYLL	8	A2AJQ3-2|D19L4_MOUSE:A2AJQ3|D19L4_MOUSE	1	1	1	1	4
KVFEYHNV	8	Q9DAX9|APBP2_MOUSE	1		1		2
KVFEYHNVL	9	Q9DAX9|APBP2_MOUSE			1		1
KVHTFPLF	8	Q9DBY1|SYVN1_MOUSE			1		1
KVIIFSYL	8	Q8CD54|PIEZ2_MOUSE				1	1
KVITFIDL	8	O08582|GTPB1_MOUSE			1	1	2
KVLEFERV	8	Q8CEC6|PPWD1_MOUSE		1	1		2
KVLIFSQM	8	Q09XV5|CHD8_MOUSE			1		1
KVLPWFEQL	9	Q8BKC5|IPO5_MOUSE			1		1
KVLRFIAEV	9	Q9QYH6|MAGD1_MOUSE			1		1
KVLRFLNV	8	Q6NXY1|WDR67_MOUSE		1	1	1	3
KVLSFIRL	8	O54798|BRS3_MOUSE		1			1
KVLVFNFL	8	Q8BH79-2|ANO10_MOUSE:Q8BH79-3|ANO10_MOUSE:Q8BH79|ANO10_MOUSE:Q8BH79-4|ANO10_MOUSE	1	1	1	1	4
KVLVFSQM	8	Q60848-2|HELLS_MOUSE:Q60848|HELLS_MOUSE	1	1	1		3
KVLVYELL	8	Q8K4F6|NSUN5_MOUSE			1		1
KVTTFAQL	8	Q99NF3|CEP41_MOUSE				1	1
KVVEFSEL	8	Q3UFM5|NOM1_MOUSE			1		1
KVVKFSYM	8	Q2M2N2|SPOPL_MOUSE			1		1
KVYDKYMSS	9	P70351|EZH1_MOUSE			1		1
KVYLYTHL	8	Q8R0A7|K0513_MOUSE	1				1
KVYNYNHL	8	P61358|RL27_MOUSE	1	1	1		3
KVYTFNSV	8	Q9R0K7|AT2B2_MOUSE:Q6Q477-2|AT2B4_MOUSE:Q6Q477|AT2B4_MOUSE:G5E829|AT2B1_MOUSE	1		1		2
LAIRFPNL	8	Q8K2Z4|CND1_MOUSE			1		1
LAPAYALL	8	P97478|COQ7_MOUSE			1		1
LAPVYQRL	8	P82198|BGH3_MOUSE	1			1	2
LARIFSIL	8	P41233|ABCA1_MOUSE			1		1
LAYLFAQL	8	Q711T7|NADE_MOUSE	1	1	1		3
LCKLFIGGL	9	Q9CX86|ROA0_MOUSE	1				1
LDYQFPKI	8	A2ARZ3|FSIP2_MOUSE	1				1
LGWNFTHTL	9	Q9CQ61|UNC50_MOUSE			1		1
LGYAFLLTM	9	P70399|TP53B_MOUSE			1		1
LGYKYVGM	8	Q9CX30|YIF1B_MOUSE			1		1
LGYWNTRGL	9	P19639|GSTM4_MOUSE			1		1
LIINFTQL	8	Q9D517|PLCC_MOUSE			1		1
LILDYRNL	8	Q5NCE8|MRS2_MOUSE		1	1		2
LIMVFAHL	8	Q91YE6|IPO9_MOUSE		1			1
LIYDFANF	8	Q9JK91|MLH1_MOUSE			1		1
LIYIFNTM	8	Q3UHA3|SPTCS_MOUSE		1	1		2
LIYKFLNV	8	Q6P5F9|XPO1_MOUSE	1	1	1	1	4
LIYTFTTTF	9	Q99PN3|TRI26_MOUSE		1	1	1	3
LMAYMASKE	9	P16858|G3P_MOUSE	1				1
LNFEFQIV	8	Q9ERU9|RBP2_MOUSE			1		1
LNNSFQQL	8	Q6ZWQ0|SYNE2_MOUSE		1	1		2
LNYAYTAQL	9	Q920Q8|NS1BP_MOUSE			1		1
LNYKFPGL	8	Q3U5C7|PRIC1_MOUSE	1	1	1		3
LPKAVVKLD	9	P08508|FCGR3_MOUSE	1				1
LQRQFLEL	8	Q8K2X1|AT10D_MOUSE	1				1
LQVIFGHL	8	P70398|USP9X_MOUSE			1		1
LQWRFANL	8	Q8VBT9|ASPC1_MOUSE		1			1
LQYEFTHL	8	Q9JL26-2|FMNL1_MOUSE:Q9JL26|FMNL1_MOUSE	1		1		2
LQYEFTKL	8	A2APV2|FMNL2_MOUSE:Q6ZPF4|FMNL3_MOUSE	1	1	1	1	4
LQYIFAHV	8	Q99PV0|PRP8_MOUSE		1	1		2
LQYLFALL	8	Q5I043|UBP28_MOUSE		1			1
LSARFSGNL	9	P61620|S61A1_MOUSE			1		1
LSFMYAHL	8	Q6ZQK5|ACAP2_MOUSE		1	1		2
LSFTSFQGL	9	O35659|GLP1R_MOUSE		1	1	1	3
LSLLHLSL	8	Q7TME2|SPAG5_MOUSE			1		1
LSLLSYQL	8	Q5DID3|UROL1_MOUSE			1		1
LSLPFEARL	9	Q9JL15|LEG8_MOUSE			1		1
LSPKYIKM	8	P60843|IF4A1_MOUSE			1		1
LSPSHYALL	9	Q8C7X2|EMC1_MOUSE			1		1
LSVDFHAL	8	Q80UK8|INT2_MOUSE			1		1
LSVRFSGNF	9	Q9JLR1|S61A2_MOUSE			1		1
LSWNKSVEL	9	Q8R4F1|NTNG2_MOUSE			1		1
LSYKKTML	8	Q9EP69|SAC1_MOUSE		1	1	1	3
LSYSFAHL	8	A1Z198-3|NL1B2_MOUSE:A1Z198-2|NL1B2_MOUSE:Q2LKU9|NLR1A_MOUSE:A1Z198|NL1B2_MOUSE:Q2LKU9-2|NLR1A_MOUSE	1				1
LSYSYQSRF	9	Q921M3|SF3B3_MOUSE		1	1	1	3
LSYTRFSL	8	Q62351|TFR1_MOUSE		1	1	1	3
LSYTRFSLA	9	Q62351|TFR1_MOUSE	1	1	1	1	4
LTQQYHQL	8	P10404|ENV1_MOUSE:P11370|ENV2_MOUSE	1				1
LVAIFTHL	8	Q9JHU4|DYHC1_MOUSE		1	1		2
LVIEFITEM	9	P61216|TAF13_MOUSE				1	1
LVLLFREL	8	P28658|ATX10_MOUSE			1		1
LVLSFLVL	8	Q3UPY5|GLBL2_MOUSE			1		1
LVYKFMNL	8	Q6PDI5|ECM29_MOUSE		1	1	1	3
LVYKNFPQL	9	Q8K1A5|TM41B_MOUSE		1	1		2
LVYQFKEM	8	Q60775|ELF1_MOUSE			1		1
LVYVLTNL	8	Q9Z127|LAT1_MOUSE			1		1
MATHFSRL	8	Q9CYQ5|HPIP_MOUSE		1			1
MAYLFRNI	8	Q9D0M1|KPRA_MOUSE		1	1		2
MNLNFQNL	8	P01849|TCA_MOUSE			1		1
MSFQFAHL	8	Q80TY5|VP13B_MOUSE	1	1	1	1	4
MSSYFERL	8	Q9Z329|ITPR2_MOUSE			1		1
MSYLFRNI	8	Q8R574|KPRB_MOUSE		1	1		2
MTFLFANL	8	Q3UYK3-2|TBCD9_MOUSE:Q5SVR0-2|TBC9B_MOUSE:Q5SVR0|TBC9B_MOUSE:Q3UYK3|TBCD9_MOUSE	1		1		2
MVMSFVNL	8	P49003|BMP5_MOUSE			1		1
NAFLFDHL	8	Q99JX4|EIF3M_MOUSE			1		1
NAFSFRKL	8	Q8VBV7|CSN8_MOUSE			1		1
NAYKFPNL	8	O54754|ADO_MOUSE		1	1	1	3
NFLVYQNI	8	Q8C779|RADX_MOUSE	1				1
NIYRFIMV	8	Q9CX13|CNIH4_MOUSE		1	1	1	3
NIYTEFPQL	9	Q9JL56|GDE1_MOUSE			1		1
NNYVYAGL	8	Q8CIK8|RFWD3_MOUSE			1		1
NQYKFILL	8	Q80V72|IP6K2_MOUSE			1		1
NSFRFSETF	9	Q01405|SC23A_MOUSE				1	1
NSFRYNGL	8	P41105|RL28_MOUSE	1	1	1	1	4
NSIRNLDTI	9	P28658|ATX10_MOUSE	1				1
NSLAYSNL	8	P97769|CITE1_MOUSE	1				1
NTYKYAKI	8	Q7TQI7|ABTB2_MOUSE	1				1
NTYNYKSTF	9	Q99L48|NMD3_MOUSE			1		1
NTYRFLTF	8	Q5XG71|UTP20_MOUSE			1		1
NVFQYLTRL	9	Q6ZQH8|NU188_MOUSE		1	1		2
NVIMFVGL	8	P14576|SRP54_MOUSE			1		1
NVIVFGRL	8	Q8CHT6|F169B_MOUSE			1		1
NVLVYELL	8	Q3TYA6|MPP8_MOUSE			1		1
NVWRFPYL	8	O35316|SC6A6_MOUSE	1	1	1	1	4
PAYHSSLMD	9	Q9JM76|ARPC3_MOUSE	1				1
PKAVVKLD	8	P08508|FCGR3_MOUSE	1				1
PLDRALAE	8	P13020|GELS_MOUSE	1				1
PPSAKAAID	9	P56959|FUS_MOUSE	1				1
PQPSGGAGG	9	Q8JZQ2|AFG32_MOUSE	1				1
PTYRFERL	8	Q9ES52|SHIP1_MOUSE			1		1
PVYVFFHL	8	P0C1P0|PIGY_MOUSE			1		1
QALKYFNL	8	Q9Z2G6-2|SE1L1_MOUSE:Q9Z2G6|SE1L1_MOUSE	1	1	1	1	4
QALKYVEL	8	P51945|CCNG1_MOUSE			1		1
QAYAFLQYL	9	Q3TDQ1|STT3B_MOUSE		1	1	1	3
QIIAFFAHL	9	Q8CHI8-5|EP400_MOUSE:Q8CHI8-3|EP400_MOUSE:Q8CHI8-2|EP400_MOUSE:Q8CHI8-4|EP400_MOUSE:Q8CHI8|EP400_MOUSE	1	1	1		3
QIIDFRGL	8	Q9D3R6|KATL2_MOUSE		1		1	2
QIIPFKTL	8	Q8BVY0|RL1D1_MOUSE	1				1
QIIRFLLL	8	O70228|ATP9A_MOUSE	1	1	1		3
QILQFPSL	8	Q3UHF7|ZEP2_MOUSE			1	1	2
QILSDFPKL	9	Q99ME9|NOG1_MOUSE	1				1
QIVSFYRV	8	Q8BUR4|DOCK1_MOUSE		1		1	2
QIYDIFQKL	9	P60843|IF4A1_MOUSE		1	1	1	3
QIYEIFQKL	9	P10630|IF4A2_MOUSE			1		1
QKYIFTSL	8	Q60875|ARHG2_MOUSE			1		1
QNFIRDVGL	9	Q3UIK4|MET14_MOUSE			1		1
QNHVFPLF	8	Q9EPL8|IPO7_MOUSE			1		1
QNHVFPLL	8	Q7TMY7|IPO8_MOUSE		1	1	1	3
QNPVYAPL	8	P14901|HMOX1_MOUSE	1	1	1		3
QNVEFLQVI	9	A3KGV1|ODFP2_MOUSE			1		1
QNYLYNVL	8	Q9JK45|KCNQ5_MOUSE			1		1
QNYRFYRGM	9	Q8BKT3|GCFC2_MOUSE			1		1
QNYTYSSL	8	Q810S1|MCUB_MOUSE	1				1
QPVSCPTT	8	Q60675|LAMA2_MOUSE	1				1
QQFIYEKL	8	Q8K2V6|IPO11_MOUSE			1		1
QQYLFDRL	8	Q8BHG1|NRDC_MOUSE		1	1		2
QQYSFINQL	9	Q66JT1|LRC8E_MOUSE				1	1
QQYSFINQM	9	Q8R502|LRC8C_MOUSE			1		1
QQYVFINQM	9	Q8BGR2|LRC8D_MOUSE			1	1	2
QSFFFTHL	8	Q5SQX6|CYFP2_MOUSE		1	1		2
QSIAFISRL	9	Q9CR67|TMM33_MOUSE	1	1	1	1	4
QSIEFSRL	8	P23116|EIF3A_MOUSE	1	1	1	1	4
QSLLSFTIL	9	Q3TDQ1|STT3B_MOUSE		1			1
QSLVFKLS	8	Q3V3Z3-2|AGRG5_MOUSE:Q3V3Z3|AGRG5_MOUSE	1				1
QSPEYENL	8	Q6ZWR6-4|SYNE1_MOUSE:Q6ZWR6|SYNE1_MOUSE	1				1
QSPGFYRNV	9	P32921|SYWC_MOUSE			1		1
QSVAFTKL	8	Q80WE4|KI20B_MOUSE			1		1
QSVDMKIGV	9	P15379|CD44_MOUSE	1				1
QSYEFFHL	8	Q8BHB0|NOD1_MOUSE	1	1	1	1	4
QTFTFTRV	8	Q3U7R1|ESYT1_MOUSE			1		1
QTYDYRNI	8	Q9JHI7|EXOS9_MOUSE	1	1			2
QVIRFEKV	8	P14106|C1QB_MOUSE	1				1
QVLRFHLL	8	Q60954|MEIS1_MOUSE		1			1
QVVNFLQTF	9	Q9CQU5|ZWINT_MOUSE			1		1
QVVQFNRL	8	O88653|LTOR3_MOUSE	1	1	1	1	4
QVYRFLGV	8	O08710|THYG_MOUSE		1			1
QVYTFTERM	9	Q9R2B6|SIA7D_MOUSE		1	1		2
RAFDYFNL	8	Q9Z2G6|SE1L1_MOUSE		1	1	1	3
RAFEFTYV	8	Q8VDR7|TGDS_MOUSE		1	1	1	3
RAFHFTAM	8	Q8K0S9|SNPC1_MOUSE			1		1
RAFLFNKV	8	P62700|YPEL5_MOUSE		1	1		2
RAFSFLNEV	9	P70280|VAMP7_MOUSE		1	1	1	3
RAFSFRTV	8	P46735|MYO1B_MOUSE		1			1
RAFVFDVL	8	Q9DC50|OCTC_MOUSE			1		1
RAIAFQHL	8	Q7TPV4|MBB1A_MOUSE		1	1		2
RAIGFLSRL	9	Q9CR76|TM186_MOUSE			1		1
RAPAFHQL	8	Q3UHH1|K0913_MOUSE			1		1
RAPFFSRL	8	Q80V94|AP4E1_MOUSE			1		1
RAPSYRTL	8	Q924W7-3|ST5_MOUSE:Q924W7-2|ST5_MOUSE:Q924W7|ST5_MOUSE	1	1			2
RAVLFVGL	8	P47758|SRPRB_MOUSE		1	1		2
RAVQFTETF	9	Q9JLV2|TP4AP_MOUSE			1		1
RAYLFAHV	8	Q5SWD9-3|TSR1_MOUSE:Q5SWD9-2|TSR1_MOUSE:Q5SWD9|TSR1_MOUSE	1	1	1	1	4
RAYLFNSV	8	Q9ESC7|YPEL1_MOUSE		1	1	1	3
RAYQYTTL	8	Q7TML3|S35F2_MOUSE			1		1
RAYRYLQL	8	Q8BH51|COX14_MOUSE		1	1	1	3
RGFEFTLM	8	O55131|SEPT7_MOUSE		1	1		2
RGFFFSHV	8	P13516|ACOD1_MOUSE		1	1		2
RGFVFITF	8	Q99020|ROAA_MOUSE			1	1	2
RGFVFNLI	8	A2AF47|DOC11_MOUSE			1		1
RGLDYFSSL	9	B1AZA5|TM245_MOUSE		1		1	2
RGLSRYPNL	9	Q61239|FNTA_MOUSE			1		1
RGPLFSHL	8	Q8C145|S39A6_MOUSE			1		1
RGPTYVNM	8	Q8K2K6-3|AGFG1_MOUSE:Q8K2K6-2|AGFG1_MOUSE:Q8K2K6-1|AGFG1_MOUSE:Q8K2K6|AGFG1_MOUSE	1				1
RGYAFVTF	8	Q5YD48|A1CF_MOUSE			1		1
RGYDFAAVL	9	Q9WVK4|EHD1_MOUSE			1	1	2
RGYEFIVRL	9	Q9JKK8|ATR_MOUSE		1	1	1	3
RGYEFLGV	8	Q8K3B1|FBSP1_MOUSE	1	1	1	1	4
RGYIYWRL	8	O35643|AP1B1_MOUSE		1	1	1	3
RGYSFTTT	8	P63260|ACTG_MOUSE:P60710|ACTB_MOUSE	1				1
RGYSFTTTA	9	P63260|ACTG_MOUSE:P60710|ACTB_MOUSE	1				1
RGYVFREL	8	P58682|TLR8_MOUSE	1				1
RIAELTSQL	9	Q3TDD9-2|PPR21_MOUSE:Q3TDD9|PPR21_MOUSE	1				1
RIFDFQGL	8	Q9DBL1|ACDSB_MOUSE		1	1		2
RIFQFQNF	8	Q5SWD9|TSR1_MOUSE			1		1
RIFSFEVNV	9	P21180|CO2_MOUSE		1			1
RIIKFVPL	8	Q8CDJ8|STON1_MOUSE		1	1	1	3
RIILFDRL	8	Q8BM85|TBCK_MOUSE			1		1
RIILFDTL	8	Q99N43|KREM1_MOUSE			1		1
RIILFGSL	8	Q80V62|FACD2_MOUSE			1		1
RILEFFGL	8	P09103|PDIA1_MOUSE	1	1	1	1	4
RILEFYSKL	9	Q9EQQ9|NCOAT_MOUSE			1		1
RILGSFPTL	9	Q3V3E1|UBS3A_MOUSE			1		1
RILKFLKL	8	O54950|AAKG1_MOUSE		1			1
RILKFLQL	8	Q91WG5|AAKG2_MOUSE		1	1		2
RIMEFTTTL	9	P97313|PRKDC_MOUSE			1		1
RIVELEGRV	9	Q91XA2|GOLM1_MOUSE	1				1
RIVELFRNL	9	P42227|STAT3_MOUSE	1				1
RIVLFDTL	8	Q80W54|FACE1_MOUSE			1		1
RIYGFTAV	8	Q69ZR2|HECD1_MOUSE	1	1	1		3
RIYGKFLGL	9	Q60996-2|2A5G_MOUSE:Q61151|2A5E_MOUSE:Q60996-3|2A5G_MOUSE:Q6PD03|2A5A_MOUSE:Q60996-4|2A5G_MOUSE:Q60996|2A5G_MOUSE	1	1	1		3
RIYPFLLM	8	Q6ZQ89|MARH6_MOUSE			1	1	2
RIYPFLLMV	9	Q6ZQ89|MARH6_MOUSE			1		1
RIYQFTAA	8	Q3UND0-2|SKAP2_MOUSE:Q3UND0|SKAP2_MOUSE	1				1
RIYRMIKL	8	P07901|HS90A_MOUSE		1			1
RIYSFQMAL	9	Q64261|CDK6_MOUSE			1		1
RNFIFSRL	8	Q60848|HELLS_MOUSE	1	1	1	1	4
RNFLYLRL	8	Q6DIC0|SMCA2_MOUSE			1		1
RNFSFISL	8	O35449|PRRT1_MOUSE			1		1
RNFVFHTL	8	Q80YR7|CLSPN_MOUSE			1		1
RNLDWFPRM	9	P11881|ITPR1_MOUSE		1			1
RNLDYARL	8	P50431|GLYC_MOUSE			1		1
RNLEFHEL	8	Q8CCN5|BCAS3_MOUSE			1		1
RNLEQFARL	9	Q9ESV0|DDX24_MOUSE			1		1
RNPQFQKL	8	P06745|G6PI_MOUSE	1		1		2
RNPTFMGL	8	P17427|AP2A2_MOUSE				1	1
RNVESYTKL	9	Q91YQ5|RPN1_MOUSE			1		1
RNVRYVHI	8	Q8QZX5|LSM10_MOUSE			1		1
RNYEYLIRL	9	Q8R3L2|TCF25_MOUSE	1	1	1	1	4
RNYQFDFL	8	Q8K4Z5|SF3A1_MOUSE	1	1	1	1	4
RNYRYFFL	8	Q8VDZ4|ZDHC5_MOUSE		1			1
RNYRYFYL	8	P59268|ZDHC9_MOUSE		1			1
RNYSYEKL	8	Q02257|PLAK_MOUSE	1			1	2
RQYIFSKL	8	Q80SU7|GVIN1_MOUSE	1	1			2
RQYMFSSL	8	P27641|XRCC5_MOUSE		1	1	1	3
RSFDFIHL	8	A2RSY6|TRM1L_MOUSE		1	1		2
RSFLHARL	8	P14685|PSMD3_MOUSE			1		1
RSIDQFANL	9	Q8VC85|LSM1_MOUSE			1	1	2
RSISFSNM	8	O35242|FAN_MOUSE		1	1		2
RSIWFQQL	8	Q9CWP6|MSPD2_MOUSE			1		1
RSLKFYSL	8	Q99KP6|PRP19_MOUSE		1	1	1	3
RSLLLLAPL	9	Q9R0E2|PLOD1_MOUSE		1	1	1	3
RSLRFVTL	8	P24638|PPAL_MOUSE		1	1	1	3
RSPAFTSRL	9	Q7TMY8|HUWE1_MOUSE			1		1
RSPEYLSL	8	Q9JLV5|CUL3_MOUSE	1	1	1	1	4
RSPIFTHL	8	P26361|CFTR_MOUSE		1			1
RSPKYLEL	8	Q7TPV4|MBB1A_MOUSE			1		1
RSPPFTARI	9	Q8C669|PELI1_MOUSE			1		1
RSPRYRLL	8	Q8VEE4|RFA1_MOUSE			1		1
RSPWFTTL	8	P10404|ENV1_MOUSE		1	1		2
RSPWFTTLI	9	P10404|ENV1_MOUSE			1		1
RSYDFEFM	8	P40336|VP26A_MOUSE	1	1	1	1	4
RSYLFLGGI	9	Q9D2C7|BI1_MOUSE	1	1	1	1	4
RSYNMPSL	8	Q8R311|CTGE5_MOUSE			1		1
RSYSFQKV	8	Q8CI75|DI3L2_MOUSE			1		1
RTFEFQLM	8	Q8C5N5|PDD2L_MOUSE			1		1
RTLIYITL	8	Q9JM76|ARPC3_MOUSE	1	1	1		3
RTYIFTFL	8	Q8JZL7-2|RGF1B_MOUSE:Q8JZL7|RGF1B_MOUSE	1				1
RTYRYFLL	8	P97326|CADH6_MOUSE		1		1	2
RTYSFLNL	8	Q810L4|TM39B_MOUSE		1	1	1	3
RTYSFLNLL	9	Q810L4|TM39B_MOUSE		1	1	1	3
RTYTYEKL	8	Q02248|CTNB1_MOUSE	1	1	1	1	4
RVAEFTTNL	9	Q8VDD5|MYH9_MOUSE	1	1	1	1	4
RVFLFEQI	8	Q9CWR0|ARHGP_MOUSE		1		1	2
RVIDFFTV	8	Q80Y17|L2GL1_MOUSE		1	1	1	3
RVISFEEQV	9	O88544|CSN4_MOUSE			1		1
RVLEFAML	8	Q3UGX3|NAT8L_MOUSE				1	1
RVLIFSQM	8	Q6PDQ2|CHD4_MOUSE:E9PZM4|CHD2_MOUSE:Q6PGB8|SMCA1_MOUSE:Q91ZW3|SMCA5_MOUSE:P40201|CHD1_MOUSE:A2A8L1|CHD5_MOUSE:A2AJK6|CHD7_MOUSE	1	1	1	1	4
RVLLFSQM	8	Q9CXF7|CHD1L_MOUSE	1				1
RVMEYINRL	9	Q68FD5|CLH_MOUSE	1	1	1	1	4
RVVAFFSL	8	Q8BZG5|RRNAD_MOUSE		1			1
RVYEFLDKL	9	P14685|PSMD3_MOUSE	1	1	1	1	4
RVYEMFQVF	9	P48410|ABCD1_MOUSE			1	1	2
RVYEMYVTV	9	O08747|UNC5C_MOUSE		1	1	1	3
RVYYFNHI	8	Q9QUR7|PIN1_MOUSE		1	1	1	3
SAARFALL	8	Q924N4-2|S12A6_MOUSE:Q924N4|S12A6_MOUSE	1	1	1	1	4
SAFAFMESL	9	O88876|DHRS3_MOUSE			1		1
SAFDFENM	8	P50396|GDIA_MOUSE				1	1
SAFEFNEL	8	Q9Z2C4|MTMR1_MOUSE			1	1	2
SAFFFGAL	8	O35604|NPC1_MOUSE	1				1
SAFSFRTL	8	Q8BMI0|FBX38_MOUSE	1	1	1	1	4
SAFTFRVTV	9	Q60575|KIF1B_MOUSE				1	1
SAFYSIVGL	9	Q9DBG6|RPN2_MOUSE			1		1
SAIFNFQSL	9	Q9CR64|KISHA_MOUSE		1	1	1	3
SAISFTEFV	9	P61022|CHP1_MOUSE			1	1	2
SAISLRNL	8	Q60988|STIL_MOUSE			1		1
SALDWWPKI	9	Q04690|NF1_MOUSE		1	1	1	3
SALEFLTHL	9	Q8C3R1-2|BRAT1_MOUSE:Q8C3R1|BRAT1_MOUSE	1	1	1	1	4
SALFFHYL	8	Q6WKZ8|UBR2_MOUSE		1	1	1	3
SALFPFSAL	9	Q3U2A8|SYVM_MOUSE		1	1		2
SALIYSNL	8	O55013|TPPC3_MOUSE	1	1	1		3
SALKYYQL	8	Q6ZPU9|KBP_MOUSE		1	1		2
SALPFVKL	8	Q0VGY8|TANC1_MOUSE		1	1	1	3
SALRFLDM	8	Q8BMT4|LRC33_MOUSE			1		1
SALRFLNL	8	Q3TAA7|S11IP_MOUSE	1	1	1	1	4
SALRFLVV	8	Q7TMY8|HUWE1_MOUSE			1		1
SALRFQAM	8	Q8K285|FCHO1_MOUSE	1		1		2
SALTFAGL	8	Q9CXV1|DHSD_MOUSE	1		1		2
SALVFNLL	8	Q61102|ABCB7_MOUSE			1		1
SALVFTRL	8	Q9JHJ3|GLMP_MOUSE	1	1	1		3
SAMVFSAM	8	P63082|VATL_MOUSE	1		1		2
SAPENAVRM	9	O35127|C10_MOUSE	1				1
SAPEYVFL	8	Q7TNB8-2|SBNO2_MOUSE:Q7TNB8|SBNO2_MOUSE	1				1
SAPLYTNL	8	Q8K4S1|PLCE1_MOUSE	1				1
SAPQFSKL	8	Q8K007|SULF1_MOUSE	1				1
SAPRFLTAF	9	Q3TQR0|PGAP2_MOUSE		1	1	1	3
SAPRYMDL	8	Q8BSU7|MOB3A_MOUSE			1		1
SAPTFINF	8	Q9CQY5|MAGT1_MOUSE			1	1	2
SAPWYLNRV	9	P29416|HEXA_MOUSE		1		1	2
SAVLMERL	8	Q8R1B4|EIF3C_MOUSE			1		1
SAVSFHSL	8	Q8BZT9|LACC1_MOUSE	1				1
SAVSFTIRL	9	Q8BJ56|PLPL2_MOUSE		1			1
SAVVYAQL	8	P97789-3|XRN1_MOUSE:P97789-2|XRN1_MOUSE:P97789|XRN1_MOUSE	1				1
SAWSFITTF	9	Q9JJC9|HERP2_MOUSE			1	1	2
SAYEFVTWL	9	Q8VCB2|MED25_MOUSE				1	1
SAYEFYHA	8	P97481|EPAS1_MOUSE	1				1
SAYEFYHAL	9	P97481|EPAS1_MOUSE	1	1			2
SAYEVIKL	8	P06151|LDHA_MOUSE	1		1		2
SAYEYLEL	8	Q5U4D8|SC5A6_MOUSE				1	1
SAYLFKQGL	9	Q8C1A9|CD029_MOUSE		1	1		2
SAYLFTYV	8	Q8BLQ7|CTR4_MOUSE	1	1			2
SAYNAFNRF	9	Q9D1C8|VPS28_MOUSE			1		1
SAYQRGESL	9	O35382|EXOC4_MOUSE	1	1	1		3
SAYRFSGV	8	Q8CJF7|ELYS_MOUSE	1				1
SAYVKKIQF	9	Q9CR11|YETS4_MOUSE			1		1
SDYIFLTTV	9	Q8VCX5|MICU1_MOUSE			1		1
SDYVYPSL	8	Q9WTU0|PHF2_MOUSE				1	1
SEEQFGGD	8	Q60668|HNRPD_MOUSE	1				1
SEIEYYAML	9	P62889|RL30_MOUSE		1	1	1	3
SEYRYTLL	8	Q9D1Q6|ERP44_MOUSE			1	1	2
SFLDVRNI	8	Q8VDM4|PSMD2_MOUSE	1				1
SFLDVRNL	8	Q8BRH0-2|TMTC3_MOUSE:Q8BRH0|TMTC3_MOUSE	1				1
SFYEHIITV	9	Q8BGZ3|DCA12_MOUSE	1	1	1	1	4
SGFIFAEV	8	P11942|CD3G_MOUSE			1		1
SGFLFAARL	9	Q6TCG5|PAQR6_MOUSE		1			1
SGFVFTRL	8	Q6PCN7|HLTF_MOUSE	1	1	1		3
SGFYYKTRI	9	Q5RJG1|NOL10_MOUSE			1		1
SGIDFKQL	8	O55222|ILK_MOUSE	1	1	1	1	4
SGLKYVAV	8	Q923D2|BLVRB_MOUSE	1				1
SGLKYVNV	8	Q8VCP8|KAD6_MOUSE	1				1
SGLVFVQV	8	O35604|NPC1_MOUSE			1		1
SGPDLSTAL	9	Q91VS7|MGST1_MOUSE	1				1
SGPQFVQL	8	Q64693|OBF1_MOUSE			1		1
SGPQLFQTF	9	Q8BFX3|KCTD3_MOUSE			1		1
SGPTYIKL	8	Q6NSR3|ADCK2_MOUSE	1				1
SGVYYTARV	9	P16382-2|IL4RA_MOUSE:P16382-3|IL4RA_MOUSE:P16382|IL4RA_MOUSE	1				1
SGYDFENRL	9	Q8VE09|TT39C_MOUSE	1			1	2
SGYDFSRL	8	Q6GQT6|SCAP_MOUSE	1	1	1	1	4
SGYEFIHKL	9	Q8BYL4|SYYM_MOUSE	1	1	1	1	4
SGYFHPLL	8	P10518|HEM2_MOUSE			1		1
SGYIFFYM	8	Q9ES63|UBP29_MOUSE			1		1
SGYIPARL	8	Q07832|PLK1_MOUSE		1	1	1	3
SGYIYHKL	8	Q9EPU0|RENT1_MOUSE	1	1	1	1	4
SGYKFFSL	8	Q80W47|WIPI2_MOUSE	1	1	1	1	4
SGYKFGVL	8	Q9D902|T2EB_MOUSE	1	1	1	1	4
SGYKYVGM	8	Q91XB7|YIF1A_MOUSE	1	1	1	1	4
SGYQYKRL	8	O88974|SETB1_MOUSE			1		1
SGYSFTHI	8	Q9D864|ARP6_MOUSE	1	1	1	1	4
SHHVFLNL	8	Q3TIX9|SNUT2_MOUSE			1		1
SHYEFHNI	8	Q69ZK0|PREX1_MOUSE			1		1
SHYYDYPSI	9	P09055|ITB1_MOUSE				1	1
SIAAFIQRL	9	Q9Z1R2|BAG6_MOUSE	1	1	1	1	4
SIALFVEHV	9	E9Q555|RN213_MOUSE		1			1
SIANFTNV	8	Q91V92|ACLY_MOUSE	1		1	1	3
SIASFVTL	8	E9Q6Z5|AUNIP_MOUSE			1		1
SIFVKERQL	9	Q80YV3|TRRAP_MOUSE			1		1
SIHSFQNL	8	Q04207|TF65_MOUSE			1		1
SIIGRLLEV	9	P62137|PP1A_MOUSE		1	1	1	3
SIIIFTNT	8	Q4FZF3|DDX49_MOUSE	1				1
SIIKATNL	8	Q80X82|SYMPK_MOUSE	1				1
SIINFIERL	9	Q9QZ09|PHTF1_MOUSE	1	1	1	1	4
SIIRLQSL	8	Q9QY06|MYO9B_MOUSE			1		1
SIISFLSL	8	Q8C145|S39A6_MOUSE		1		1	2
SIIVFNLV	8	P42867|GPT_MOUSE	1	1		1	3
SILALTHL	8	Q6P5B0|RRP12_MOUSE			1		1
SILESFIHV	9	E9Q8I9|FRY_MOUSE			1		1
SILKFFEI	8	P34152-7|FAK1_MOUSE:P34152-6|FAK1_MOUSE:P34152-5|FAK1_MOUSE:P34152-3|FAK1_MOUSE:P34152-4|FAK1_MOUSE:P34152-2|FAK1_MOUSE:P34152|FAK1_MOUSE	1			1	2
SILRFITI	8	P22366-2|MYD88_MOUSE:P22366|MYD88_MOUSE	1	1	1		3
SILRYLARI	9	Q8CGC7|SYEP_MOUSE		1	1		2
SILTLSHL	8	Q9R1K7|TBD_MOUSE			1		1
SILTYAFL	8	Q8BZ00|SL9A9_MOUSE	1				1
SILTYSRI	8	Q8VD65|PI3R4_MOUSE			1		1
SILYPLLRL	9	Q7TPQ3|SHPRH_MOUSE		1	1		2
SIMAFHKL	8	Q7TPM9|MTMRA_MOUSE	1	1	1		3
SINKFLSHL	9	E9PZJ8|ASCC3_MOUSE		1	1		2
SITKFLNRI	9	Q7TNB8|SBNO2_MOUSE		1	1	1	3
SITSFPRL	8	Q99JP7|GGT7_MOUSE	1				1
SIVQFYYM	8	Q9R190|MTA2_MOUSE	1	1	1	1	4
SIVSYNHL	8	Q9JHU9|INO1_MOUSE	1		1		2
SIWLFQANL	9	Q9D2C7|BI1_MOUSE		1	1	1	3
SIYAPARL	8	P51944|CCNF_MOUSE			1		1
SIYAREALI	9	Q9CU62|SMC1A_MOUSE			1		1
SIYARFVQL	9	Q91WF7|FIG4_MOUSE			1		1
SIYDAFPKV	9	Q9QXZ0-3|MACF1_MOUSE:Q9QXZ0-2|MACF1_MOUSE:Q9QXZ0-4|MACF1_MOUSE:Q9QXZ0|MACF1_MOUSE	1		1		2
SIYEKLIQF	9	Q02614|S30BP_MOUSE		1	1	1	3
SIYEYYHAL	9	Q61221|HIF1A_MOUSE			1		1
SIYKLRTL	8	P31649|S6A13_MOUSE			1		1
SIYQFLIAV	9	P39749|FEN1_MOUSE		1	1	1	3
SIYRVPLL	8	P70698|PYRG1_MOUSE			1		1
SIYVYKVL	8	Q64524|H2B2E_MOUSE			1		1
SKYDFPKL	8	Q62293|TGTP1_MOUSE:Q3T9E4|TGTP2_MOUSE	1				1
SKYYHGEL	8	P18242|CATD_MOUSE			1		1
SLALFVNL	8	Q8BUR4|DOCK1_MOUSE			1		1
SLIEFFNKM	9	Q64700|RBL2_MOUSE		1	1		2
SLILFSTRL	9	Q9QUK4|BIR1B_MOUSE	1	1	1	1	4
SLIRFPLM	8	P58544|BTBD1_MOUSE			1		1
SLISYAKL	8	P70277|SIA7B_MOUSE			1		1
SLLLLAPL	8	Q9R0E2|PLOD1_MOUSE	1				1
SLLPSSNL	8	Q9CW46|RAVR1_MOUSE	1				1
SLLRFNAL	8	E2JF22|PIEZ1_MOUSE		1	1		2
SLLTPFPLL	9	P13745|GSTA1_MOUSE		1			1
SLLYFINNM	9	Q8VCB1|NDC1_MOUSE		1	1		2
SLNLRETNL	9	P20152|VIME_MOUSE	1				1
SLVDLNTRL	9	Q922Q1|MARC2_MOUSE	1				1
SLVEFRNL	8	Q8BHP7|OLM2A_MOUSE				1	1
SLVGFTQM	8	Q9CY27|TECR_MOUSE			1		1
SLVIFMQL	8	Q9R049|AMFR_MOUSE			1		1
SLVTFRTL	8	Q9QXS1-15|PLEC_MOUSE:Q9QXS1-10|PLEC_MOUSE:Q9QXS1-9|PLEC_MOUSE:Q9QXS1-12|PLEC_MOUSE:Q9QXS1-11|PLEC_MOUSE:Q9QXS1-13|PLEC_MOUSE:Q9QXS1-3|PLEC_MOUSE:Q9QXS1-5|PLEC_MOUSE:Q9QXS1-16|PLEC_MOUSE:Q9QXS1-4|PLEC_MOUSE:Q9QXS1-14|PLEC_MOUSE:Q9QXS1-6|PLEC_MOUSE:Q9QXS1-7|PLEC_MOUSE:Q9QXS1-8|PLEC_MOUSE:Q9QXS1-2|PLEC_MOUSE:Q9QXS1|PLEC_MOUSE	1		1	1	3
SLYDAFPKV	9	Q91ZU6-8|DYST_MOUSE:Q91ZU6-6|DYST_MOUSE:Q91ZU6-2|DYST_MOUSE:Q91ZU6|DYST_MOUSE:Q91ZU6-3|DYST_MOUSE:Q91ZU6-4|DYST_MOUSE	1				1
SLYEHVERM	9	Q7TSI1|PKHM1_MOUSE			1		1
SLYLFKLGI	9	Q3UQ44|IQGA2_MOUSE			1		1
SLYMFYEL	8	Q8BHI7|ELOV5_MOUSE			1	1	2
SLYRFTTI	8	Q91WS7|DEPD7_MOUSE		1		1	2
SMFEFSEKL	9	Q60674|NR1D2_MOUSE			1		1
SMILFTSL	8	P28658|ATX10_MOUSE	1				1
SMIRILGL	8	E9PZJ8|ASCC3_MOUSE		1			1
SMQTVFNM	8	Q60865|CAPR1_MOUSE	1				1
SMVDVVML	8	Q9Z1R2|BAG6_MOUSE	1				1
SMVRMQQL	8	Q99P69|NUF2_MOUSE			1		1
SMYQPLNL	8	Q8VI38|GBGT1_MOUSE	1				1
SMYVPGKL	8	Q9WU28|PFD5_MOUSE	1	1	1		3
SNFEYLMQL	9	Q6ZQA0|NBEL2_MOUSE			1		1
SNFHFAVL	8	Q80TY5|VP13B_MOUSE		1	1		2
SNFHFAVLV	9	Q80TY5|VP13B_MOUSE			1		1
SNFHYHEL	8	Q08460|KCMA1_MOUSE			1		1
SNFNFALV	8	Q04690|NF1_MOUSE		1	1		2
SNFNYERSL	9	O35841|API5_MOUSE			1		1
SNHVFNAL	8	Q9DBU3|RIOK3_MOUSE	1		1		2
SNIHYHTL	8	Q9D0N7|CAF1B_MOUSE			1		1
SNIQYITRF	9	Q9JM13|RABX5_MOUSE			1		1
SNIQYRSL	8	Q8CH77|NAV1_MOUSE	1	1		1	3
SNIRFQFV	8	Q8VE11|MTMR6_MOUSE			1		1
SNISFLHL	8	Q8BGC1|CE022_MOUSE			1		1
SNITFVVNL	9	Q99P91|GPNMB_MOUSE				1	1
SNLKYILV	8	A2AWL7-4|MGAP_MOUSE:A2AWL7-2|MGAP_MOUSE:A2AWL7-3|MGAP_MOUSE:A2AWL7|MGAP_MOUSE	1		1		2
SNLKYSLL	8	Q3UHQ6|DOP2_MOUSE			1		1
SNLLLPKL	8	Q91W96|APC4_MOUSE			1		1
SNLQYSLL	8	Q9R1X5|MRP5_MOUSE			1		1
SNLRYLNL	8	Q8C031|LRC4C_MOUSE			1		1
SNLRYLSL	8	Q99MB1|TLR3_MOUSE		1		1	2
SNLYYKYL	8	O88845|AKA10_MOUSE			1		1
SNPEFRQL	8	Q3UWM4|KDM7A_MOUSE	1	1	1		3
SNPEFSSV	8	P26039|TLN1_MOUSE	1				1
SNVDFLLRL	9	Q99MR8|MCCA_MOUSE			1		1
SNVERITNV	9	P70704|AT8A1_MOUSE			1		1
SNVKHVINF	9	P16381|DDX3L_MOUSE		1	1	1	3
SNVKLEQL	8	P05531|XLR_MOUSE			1		1
SNVKYVML	8	Q61115|PTC1_MOUSE			1		1
SNVLYQHNL	9	P42227|STAT3_MOUSE			1		1
SNVNYYNRL	9	Q8C0I4|EPC2_MOUSE			1		1
SNVVFKLL	8	Q03958|PFD6_MOUSE			1		1
SNYAFANI	8	Q8BFW9|GTR12_MOUSE				1	1
SNYERLESL	9	P43883|PLIN2_MOUSE	1	1	1	1	4
SNYHFYSSI	9	Q60795|NF2L2_MOUSE	1	1	1	1	4
SNYIFVSI	8	Q9ESG6|P2Y14_MOUSE			1		1
SNYKFFLL	8	P59267|ZDHC2_MOUSE		1	1	1	3
SNYLFTKL	8	P97481|EPAS1_MOUSE	1	1	1	1	4
SNYLHRVV	8	Q78JE5|FBX22_MOUSE		1	1		2
SNYLYREV	8	Q9EPL0|XYLT2_MOUSE			1		1
SNYNFEKPF	9	Q61820|RANT_MOUSE			1		1
SNYQHITNF	9	O54774|AP3D1_MOUSE	1		1	1	3
SNYQYLLHL	9	O35242|FAN_MOUSE			1		1
SNYSYPQV	8	Q61545|EWS_MOUSE	1	1	1	1	4
SNYVFVFL	8	Q9Z0S9|PRAF1_MOUSE	1	1	1	1	4
SNYYVRIL	8	P54775|PRS6B_MOUSE			1		1
SPYKFRNL	8	Q8R1K4|AT2L2_MOUSE			1		1
SQFAFESVV	9	Q8C147|DOCK8_MOUSE			1		1
SQFKYALV	8	Q9QXB9|DRG2_MOUSE	1	1	1	1	4
SQIRFGLL	8	Q9Z160|COG1_MOUSE				1	1
SQLEFRQNL	9	Q80UK0|SESD1_MOUSE			1		1
SQLIYNHI	8	Q9QYC0|ADDA_MOUSE			1		1
SQLIYNLI	8	Q2PZL6|FAT4_MOUSE		1	1		2
SQVIFHLL	8	Q8VCB1|NDC1_MOUSE		1	1	1	3
SQVISNAK	8	Q61316|HSP74_MOUSE	1				1
SQVMNLHNL	9	P29812|TYRP2_MOUSE	1				1
SQYDFIDL	8	Q80YA7|DPP8_MOUSE			1	1	2
SQYEFENYM	9	Q7TNL3|STK40_MOUSE			1	1	2
SQYLFPKL	8	P35396|PPARD_MOUSE	1	1	1	1	4
SQYRFEHL	8	Q3UJK4|GTPB2_MOUSE	1	1	1	1	4
SQYRFIVF	8	P21995|EMB_MOUSE		1	1	1	3
SQYVFTEM	8	Q5SYH2|TM199_MOUSE	1	1	1	1	4
SRIVFIPL	8	Q9JIM1|S29A1_MOUSE			1	1	2
SRIVFIPLL	9	Q9JIM1|S29A1_MOUSE			1	1	2
SRIVFRHL	8	Q9CR88|RT14_MOUSE	1		1		2
SRVSFTSL	8	Q8K3I9|GLCI1_MOUSE			1		1
SRYQFRNL	8	Q8R035-2|ICT1_MOUSE:Q8R035|ICT1_MOUSE	1	1	1		3
SSAIYMNL	8	Q8VHR5-2|P66B_MOUSE:Q8VHR5|P66B_MOUSE	1				1
SSFAFHKV	8	Q3TYV2|HHLA1_MOUSE				1	1
SSFHFNQHL	9	Q8CC12|CDAN1_MOUSE			1		1
SSFHFPYL	8	Q8VD53|ACER2_MOUSE		1	1		2
SSFKAALL	8	P35601|RFC1_MOUSE			1		1
SSFLFSYL	8	P23738|DCHS_MOUSE	1				1
SSFLFWRM	8	P97783|AF1Q_MOUSE		1		1	2
SSFPFMLL	8	Q62388|ATM_MOUSE			1		1
SSFSFNHL	8	Q8C2S7|AMGO3_MOUSE				1	1
SSFSHYSGL	9	Q9CY58|PAIRB_MOUSE		1	1	1	3
SSFSRVTNF	9	Q8BYH7|TBC17_MOUSE			1		1
SSFVFLNL	8	Q64310|SURF4_MOUSE	1	1	1	1	4
SSFVFSTV	8	Q01237|HMDH_MOUSE	1	1	1	1	4
SSFVFSTVV	9	Q01237|HMDH_MOUSE			1		1
SSHSFPQL	8	Q8K371|AMOL2_MOUSE		1		1	2
SSILYPLL	8	Q7TPQ3|SHPRH_MOUSE			1		1
SSIRYFEI	8	O89053|COR1A_MOUSE			1		1
SSIVFAEL	8	Q9Z2R9|E2AK1_MOUSE	1		1	1	3
SSLARLPSL	9	P97822|AN32E_MOUSE			1		1
SSLEFSQI	8	Q8K114|INT9_MOUSE			1		1
SSLEFTEL	8	O08738|CASP6_MOUSE	1				1
SSLEMTTTF	9	Q91YJ3|THYN1_MOUSE			1		1
SSLFPFALL	9	Q80TA6|MTMRC_MOUSE			1		1
SSLHFSFL	8	Q80TN4|DJC16_MOUSE		1	1	1	3
SSLHPMGGL	9	P28659-2|CELF1_MOUSE:P28659-3|CELF1_MOUSE:P28659|CELF1_MOUSE:P28659-4|CELF1_MOUSE	1				1
SSLKFLLL	8	Q6AXC6|DDX11_MOUSE	1		1		2
SSLLFTQI	8	P49452|CENPC_MOUSE			1		1
SSLLFVKL	8	Q80ZV0|RNH2B_MOUSE	1	1	1	1	4
SSLLLEHL	8	Q8BM55|TM214_MOUSE			1		1
SSLRFTTI	8	Q6ZQL4|WDR43_MOUSE			1		1
SSLSFNTRL	9	Q5SSN7|SFT2A_MOUSE		1	1	1	3
SSLYFRDL	8	Q9DCM7|NACC2_MOUSE		1		1	2
SSMAFKQM	8	Q9WVA4|TAGL2_MOUSE			1		1
SSMEKPPSL	9	Q7TNE3|SPAG7_MOUSE			1		1
SSMRYVLL	8	P48441|IDUA_MOUSE			1		1
SSMTYEKL	8	O70273|EHF_MOUSE			1		1
SSPHYTTL	8	P27046|MA2A1_MOUSE	1	1	1		3
SSPKFSEI	8	Q91VM3|WIPI4_MOUSE	1	1	1	1	4
SSPKFSEL	8	A2AGT5|CKAP5_MOUSE	1	1			2
SSPLYTTL	8	Q9CR47|NSA2_MOUSE			1		1
SSPPPYPAL	9	Q6S5L9|SHC4_MOUSE				1	1
SSPQFVGNL	9	Q61458|CCNH_MOUSE			1		1
SSPVFKAMF	9	Q9Z2X8|KEAP1_MOUSE			1		1
SSTYFHQL	8	Q8BN78|KAISO_MOUSE			1		1
SSVKFNPV	8	Q6PAC3|DCA13_MOUSE	1		1		2
SSVLYSRV	8	Q8CGC7|SYEP_MOUSE		1	1		2
SSVRFSYM	8	Q8R5K4|NOL6_MOUSE		1	1		2
SSVYFRSV	8	Q9D6Y4|BORC8_MOUSE	1	1	1	1	4
SSVYFVAL	8	P03953-2|CFAD_MOUSE:P03953|CFAD_MOUSE	1				1
SSYAYTKV	8	Q8BG87|TET3_MOUSE:Q8BG87-4|TET3_MOUSE	1		1		2
SSYFFGKL	8	Q99P81|ABCG3_MOUSE	1		1		2
SSYFFGKV	8	Q7TMS5|ABCG2_MOUSE		1		1	2
SSYIFSLV	8	P41438-2|S19A1_MOUSE	1				1
SSYKFLPLM	9	Q62388|ATM_MOUSE		1			1
SSYKFNHL	8	Q8K2I1|FNTB_MOUSE	1	1	1	1	4
SSYQHTSV	8	Q9CRT8|XPOT_MOUSE		1	1	1	3
SSYRFVQNV	9	P42128|FOXK1_MOUSE			1		1
SSYSFRHL	8	O35448|PPT2_MOUSE	1	1	1	1	4
SSYSFRHLL	9	O35448|PPT2_MOUSE		1			1
SSYTFEQL	8	Q6NZR2|MSD2_MOUSE		1	1	1	3
SSYTFPKM	8	Q9WUR2|ECI2_MOUSE	1	1	1	1	4
SSYTFPKMM	9	Q9WUR2|ECI2_MOUSE		1	1	1	3
SSYVHSNL	8	Q6P4T1|SNX19_MOUSE	1				1
STFDHPEL	8	P80314|TCPB_MOUSE			1	1	2
STFEFHSI	8	O70481|UBR1_MOUSE		1	1	1	3
STFFYPKL	8	Q91ZX6|SENP2_MOUSE			1		1
STFIYNSI	8	Q9Z0E6|GBP2_MOUSE:Q01514|GBP1_MOUSE	1	1			2
STFSFRNAL	9	P29812|TYRP2_MOUSE		1			1
STFSFTKV	8	Q3TZZ7|ESYT2_MOUSE			1		1
STFTFADL	8	Q9ERU9|RBP2_MOUSE			1	1	2
STFVYNSM	8	Q61107|GBP4_MOUSE	1	1			2
STFVYNTM	8	Q8CFB4|GBP5_MOUSE	1	1			2
STIEFKNM	8	Q6NXI6|RPRD2_MOUSE	1	1	1		3
STIHFYSL	8	Q3U2P1|SC24A_MOUSE		1	1	1	3
STIVYYKL	8	Q8R3W5|SEN15_MOUSE			1		1
STLIYKFL	8	Q6P5F9|XPO1_MOUSE		1	1		2
STLIYRNM	8	Q9D8N6|LIN37_MOUSE	1	1	1		3
STLLFAHI	8	P53995|APC1_MOUSE			1		1
STLSHVVL	8	Q9DCN2|NB5R3_MOUSE			1		1
STLTYSRM	8	Q9WVC6|SGK1_MOUSE	1		1		2
STPEFYQV	8	Q99JY9|ARP3_MOUSE			1	1	2
STPVFTLL	8	Q8BP86|SNPC4_MOUSE			1		1
STRLFAVL	8	P46978|STT3A_MOUSE		1	1	1	3
STVEFTNL	8	O54692|ZW10_MOUSE	1	1	1		3
STWVFPTL	8	Q9D8N0|EF1G_MOUSE			1		1
STYDFMSTL	9	P29416|HEXA_MOUSE				1	1
STYKFFEV	8	Q9CZM2|RL15_MOUSE	1	1	1	1	4
STYKFFEVI	9	Q9CZM2|RL15_MOUSE			1		1
STYLFRLM	8	Q3UN04|UBP30_MOUSE		1	1		2
STYSVAKM	8	O09159|MA2B1_MOUSE	1				1
SVAELQARL	9	Q9CQA1|TPPC5_MOUSE			1		1
SVFEKYFQF	9	Q9CVB6|ARPC2_MOUSE		1	1		2
SVFQFSRKI	9	Q6A065|CE170_MOUSE			1		1
SVICFVGL	8	P47774|CCR7_MOUSE	1				1
SVIDFTVTM	9	Q91XQ0|DYH8_MOUSE			1		1
SVIKFENL	8	Q9CPV7|ZDHC6_MOUSE	1	1	1	1	4
SVILMQHL	8	Q810L4|TM39B_MOUSE			1		1
SVISVIHL	8	Q8VDP6|CDIPT_MOUSE			1		1
SVLLFIEHV	9	Q61168|LAPM5_MOUSE			1		1
SVLQFLASV	9	Q9WUU9|MCM3A_MOUSE			1		1
SVLQFLGL	8	P36536|SAR1A_MOUSE		1	1	1	3
SVPVFIPL	8	Q8K015|CENPO_MOUSE			1		1
SVVAFHNL	8	Q71B07|D19L3_MOUSE	1		1	1	3
SVVAYNNL	8	Q99LM9|TADA1_MOUSE	1	1	1		3
SVVDHFNRI	9	P26516|PSD7_MOUSE			1		1
SVVGFVEL	8	Q8C176|TAF2_MOUSE			1		1
SVVLMSHL	8	P09411|PGK1_MOUSE			1		1
SVVRYVQL	8	O35900|LSM2_MOUSE	1	1	1	1	4
SVVSFDKV	8	D3YXK2|SAFB1_MOUSE			1		1
SVVSFRLV	8	Q8C7E9|CSTFT_MOUSE		1			1
SVVTRLVAL	9	Q62465|VAT1_MOUSE		1			1
SVVVFQSF	8	Q99J93|IFM2_MOUSE			1	1	2
SVYDFFVWL	9	P29812|TYRP2_MOUSE		1			1
SVYKFFDL	8	P13405|RB_MOUSE	1	1	1	1	4
SVYLVRQL	8	Q8C5D8|PIAS2_MOUSE			1		1
SVYPFTLI	8	Q8BGF9|S2544_MOUSE	1	1	1		3
SVYQPAQL	8	B2RVL6|ZCH24_MOUSE	1				1
SVYTHSYL	8	Q8K0L2-2|ENTP8_MOUSE:Q8K0L2|ENTP8_MOUSE:Q3TZX8-3|NOL9_MOUSE:Q3TZX8-2|NOL9_MOUSE:Q3TZX8|NOL9_MOUSE	1	1	1		3
SVYVYKVL	8	P10854|H2B1M_MOUSE:Q8CGP2|H2B1P_MOUSE:Q8CGP1|H2B1K_MOUSE:Q64525|H2B2B_MOUSE:Q64478|H2B1H_MOUSE:Q6ZWY9|H2B1C_MOUSE:P10853|H2B1F_MOUSE:Q64475|H2B1B_MOUSE	1	1	1	1	4
SVYVYRPL	8	Q9Z2V9|CCNI_MOUSE			1		1
SWIEVQFL	8	Q9Z1K5|ARI1_MOUSE	1				1
SWLHTSEL	8	Q3UM18|LSG1_MOUSE			1		1
SWLYASRL	8	Q99LC3|NDUAA_MOUSE			1		1
TAFEFNEYF	9	Q9Z2D1|MTMR2_MOUSE		1			1
TAFEYLEEF	9	Q3USW5|FXRD2_MOUSE				1	1
TAFKFKAL	8	Q04690|NF1_MOUSE			1		1
TAFQFLQL	8	P51945|CCNG1_MOUSE	1	1	1	1	4
TAFRFSEL	8	A3KGB4|TBC8B_MOUSE		1	1	1	3
TAFVFPRL	8	Q8BK62|OLFL3_MOUSE	1	1	1	1	4
TAIHFAEQL	9	Q9D7H3|RTCA_MOUSE			1		1
TAISFNLL	8	P41251|NRAM1_MOUSE	1				1
TALDHYSEL	9	Q6ZWQ0-3|SYNE2_MOUSE:Q6ZWQ0|SYNE2_MOUSE	1	1	1	1	4
TALENLSTL	9	P19096|FAS_MOUSE		1	1	1	3
TALNFLHL	8	O08918|CCNG2_MOUSE			1		1
TALRFLEL	8	Q8VD65|PI3R4_MOUSE		1	1	1	3
TALSFYHM	8	Q8VCX5|MICU1_MOUSE			1		1
TAPDYFLL	8	Q9R1T2|SAE1_MOUSE			1		1
TAPEFPEF	8	Q8CII2|CD123_MOUSE			1		1
TAPEYVFL	8	Q689Z5|SBNO1_MOUSE:Q689Z5-2|SBNO1_MOUSE	1	1	1	1	4
TAPHYQLL	8	Q9D5R2|WDR20_MOUSE		1	1		2
TAPQYYRL	8	Q6PJN8|DALD3_MOUSE		1	1		2
TAPVYNQV	8	Q6ZQ73|CAND2_MOUSE	1				1
TAYAFHFL	8	Q9R0H0-2|ACOX1_MOUSE:Q9R0H0|ACOX1_MOUSE	1	1	1	1	4
TAYEFAKL	8	Q9EQ06|DHB11_MOUSE	1	1	1	1	4
TAYLFSRF	8	Q9CRT8|XPOT_MOUSE			1		1
TAYLFSRFV	9	Q9CRT8|XPOT_MOUSE			1		1
TAYRPPAL	8	Q8BJW6-2|EIF2A_MOUSE:Q8BJW6|EIF2A_MOUSE	1				1
TEYVFTHL	8	Q6NWW9|FND3B_MOUSE	1	1		1	3
TGFSYESLF	9	Q8VDV8|MITD1_MOUSE			1		1
TGIKFVVL	8	Q9ES56|TPPC4_MOUSE			1		1
TGLRYNMRL	9	Q6P5E4|UGGG1_MOUSE			1		1
TGPDYYSQL	9	Q6PDK2|MLL2_MOUSE			1		1
TGPKYIHL	8	Q60805|MERTK_MOUSE	1				1
TGYNFQRV	8	Q922V4|PLRG1_MOUSE	1	1	1		3
TGYSFKFGF	9	Q9QXT1|DAPP1_MOUSE			1		1
THYSFLATL	9	Q5U419|MFSD3_MOUSE		1			1
TIFAFINV	8	P70414|NAC1_MOUSE	1				1
TIFNFIITV	9	Q5SYH2|TM199_MOUSE			1		1
TIIIFHSL	8	P97480|EYA3_MOUSE:O08575|EYA2_MOUSE	1	1	1	1	4
TIILFTKV	8	Q8K2V6|IPO11_MOUSE:Q8K2V6-2|IPO11_MOUSE	1	1	1	1	4
TIIVFHSL	8	P97767|EYA1_MOUSE		1			1
TILEFAQL	8	Q91XL3|UXS1_MOUSE	1	1	1	1	4
TILEFSQNM	9	Q6P5F9|XPO1_MOUSE	1	1	1	1	4
TILSFTNL	8	Q8CFE6|S38A2_MOUSE	1	1	1	1	4
TILSFTNLL	9	Q8CFE6|S38A2_MOUSE			1		1
TIPLFVQL	8	Q02248|CTNB1_MOUSE			1		1
TITKFLQL	8	B1AZI6|THOC2_MOUSE			1		1
TITSFPRL	8	P97494|GSH1_MOUSE			1		1
TIVEFLHSF	9	Q91YE5-2|BAZ2A_MOUSE:Q91YE5|BAZ2A_MOUSE:Q91YE5-3|BAZ2A_MOUSE	1	1	1	1	4
TIVSLLSTL	9	Q69ZR2|HECD1_MOUSE			1		1
TIYDFWRM	8	P28828|PTPRM_MOUSE	1	1			2
TIYERFVLV	9	P63154|CRNL1_MOUSE			1		1
TIYEYGAL	8	P46412|GPX3_MOUSE	1				1
TIYKFQGM	8	Q8R2T8-2|TF3C5_MOUSE:Q8R2T8|TF3C5_MOUSE	1	1	1		3
TIYQFLRL	8	P70408|CAD10_MOUSE		1		1	2
TIYQFLRLF	9	P70408|CAD10_MOUSE		1		1	2
TIYRFLKL	8	Q8CEF1|FEM1C_MOUSE	1	1	1	1	4
TLFQFPTL	8	P41971|ELK3_MOUSE			1		1
TLVEFRNL	8	Q3V1G4|OLM2B_MOUSE	1				1
TNFEYLTHL	9	P97412|LYST_MOUSE	1	1	1		3
TNFTKIASF	9	Q3U3D7|T131L_MOUSE			1		1
TNIIHNLGM	9	Q921I0|ORML1_MOUSE			1		1
TNINFPNL	8	Q8BRH4|MLL3_MOUSE			1		1
TNISFTNM	8	Q9CYY7|PLD3B_MOUSE	1	1	1		3
TNLIYNLL	8	Q8C129|LCAP_MOUSE			1		1
TNLIYQQV	8	P97479|MYO7A_MOUSE	1	1		1	3
TNLRFLNRL	9	Q5NCI0|URGCP_MOUSE			1		1
TNLRFLQQI	9	O70372|TERT_MOUSE			1		1
TNLRYLAL	8	P17427|AP2A2_MOUSE:P17426-2|AP2A1_MOUSE:P17426|AP2A1_MOUSE	1	1	1		3
TNLVYPAL	8	Q8BLR9-2|HIF1N_MOUSE:Q8BLR9|HIF1N_MOUSE	1				1
TNPSFDGRL	9	Q6PA06|ATLA2_MOUSE			1	1	2
TNQDFIQRL	9	Q80TM9|NISCH_MOUSE	1	1	1	1	4
TNVDFPSL	8	Q9Z179|SHCBP_MOUSE	1				1
TNVEYAHL	8	Q8K370|ACD10_MOUSE			1		1
TNVLFNHL	8	Q9D706|RPAP3_MOUSE	1	1	1		3
TNVQYSNL	8	Q45VK7|DYHC2_MOUSE	1	1	1		3
TNVTFSKV	8	Q6P5B0|RRP12_MOUSE	1				1
TNYIFDSL	8	Q9CXF4|TBC15_MOUSE	1	1	1	1	4
TNYKFFML	8	Q5Y5T1-2|ZDH20_MOUSE:Q5Y5T1|ZDH20_MOUSE	1	1	1	1	4
TNYNFQYI	8	Q8K2C8|GPAT4_MOUSE		1	1		2
TNYRFKNL	8	Q9Z238|CCNE2_MOUSE	1	1	1	1	4
TNYRFKNLF	9	Q9Z238|CCNE2_MOUSE		1	1		2
TNYTFENV	8	Q61493|DPOLZ_MOUSE		1			1
TQFLYPKV	8	P15066|JUND_MOUSE		1	1		2
TQLEHILL	8	Q01320|TOP2A_MOUSE			1		1
TQLLELMDL	9	Q8BPN8|DMXL2_MOUSE	1				1
TQYIFNNM	8	P27046|MA2A1_MOUSE		1			1
TQYIFTEKL	9	Q3UMQ8|NAF1_MOUSE			1		1
TQYLFERTF	9	Q9QYK5|H6ST1_MOUSE			1		1
TQYSFYQQL	9	Q9Z329|ITPR2_MOUSE			1		1
TQYTFSSI	8	Q08943|SSRP1_MOUSE		1	1	1	3
TSFRYSSL	8	Q8BX90|FND3A_MOUSE	1	1			2
TSIAFKNI	8	Q03141-2|MARK3_MOUSE:Q03141-3|MARK3_MOUSE:Q03141|MARK3_MOUSE:Q8VHJ5|MARK1_MOUSE	1		1		2
TSILFINV	8	Q60841|RELN_MOUSE				1	1
TSLAFESRL	9	Q5SXY1-2|CYTSB_MOUSE:Q5SXY1|CYTSB_MOUSE	1		1		2
TSLKYLEM	8	Q9CWG9|BL1S2_MOUSE			1		1
TSLKYMLL	8	Q8BG32|PSD11_MOUSE			1		1
TSLRFVFL	8	Q9CQV4|RETR3_MOUSE	1	1	1	1	4
TSPEYQKL	8	Q920R0|ALS2_MOUSE	1	1	1		3
TSPHYQNL	8	Q61152|PTN18_MOUSE	1		1		2
TSPVFILL	8	Q8R235|TM203_MOUSE	1				1
TSRSFPHL	8	P10107|ANXA1_MOUSE			1		1
TSVQFMKL	8	P19096|FAS_MOUSE			1		1
TSVRFTQL	8	Q9D6T0|NOSIP_MOUSE	1	1	1	1	4
TSVVFNKL	8	Q791N7|RPA12_MOUSE	1	1	1	1	4
TSYAFHEL	8	B2RU80|PTPRB_MOUSE	1				1
TSYRFLAL	8	Q8QZX2|HAUS3_MOUSE	1	1	1	1	4
TSYRFTTEL	9	P22933|GBRD_MOUSE			1		1
TTFEHAHNM	9	P58252|EF2_MOUSE			1		1
TTFSYVNNM	9	Q9D6K9|CERS5_MOUSE				1	1
TTLIFQKL	8	P15307|REL_MOUSE			1		1
TTLQYRSL	8	Q80TN7|NAV3_MOUSE	1				1
TTPVYVAL	8	O54950|AAKG1_MOUSE			1		1
TTVAFTQV	8	P12970|RL7A_MOUSE	1				1
TTYAFFNTF	9	P20060|HEXB_MOUSE		1	1		2
TTYKYEMI	8	Q8QZY1|EIF3L_MOUSE	1	1	1	1	4
TTYKYFAL	8	Q5BLK4|TUT7_MOUSE	1	1	1	1	4
TTYRFPEL	8	Q8K440|ABC8B_MOUSE		1			1
TVFNFQEKV	9	Q9JHU4|DYHC1_MOUSE			1		1
TVFSNFPVF	9	Q5SSI6|UTP18_MOUSE			1		1
TVIEFSREL	9	Q9CXI3|MOXD1_MOUSE				1	1
TVIIYVRL	8	Q91YQ5|RPN1_MOUSE		1	1		2
TVPELTQQM	9	Q9D6F9|TBB4A_MOUSE:Q9CWF2|TBB2B_MOUSE:P68372|TBB4B_MOUSE:Q7TMM9|TBB2A_MOUSE:Q922F4|TBB6_MOUSE:Q9ERD7|TBB3_MOUSE	1				1
TVVNFLIRV	9	Q80YV3|TRRAP_MOUSE			1		1
TVYPMERL	8	Q9ERG0|LIMA1_MOUSE			1		1
TWLVVTTL	8	P18181|CD48_MOUSE	1		1		2
VADKFSEL	8	Q7TNP2|2AAB_MOUSE	1		1	1	3
VADKFTEL	8	Q76MZ3|2AAA_MOUSE	1		1		2
VAFAYKNV	8	Q9DCF9|SSRG_MOUSE	1	1	1	1	4
VAFDFTKV	8	Q7M6Y3|PICAL_MOUSE	1	1	1	1	4
VAFDRHLYV	9	Q9CQ33|LZTR1_MOUSE			1		1
VAFIFNQKF	9	Q8BML1|MICA2_MOUSE			1		1
VAFKHLFL	8	Q8K595|MCLN2_MOUSE			1		1
VAHTFVIGV	9	P50580|PA2G4_MOUSE		1	1		2
VAIRFDSGL	9	Q9ERU3|ZNF22_MOUSE	1	1		1	3
VALDFEQEM	9	P60710|ACTB_MOUSE:P63260|ACTG_MOUSE	1				1
VALEFTHL	8	Q9ERV7|PIDD_MOUSE			1		1
VALKFSQI	8	Q62187|TTF1_MOUSE		1			1
VALLFRQL	8	Q6ZPE2|MTMR5_MOUSE:Q6ZPE2-2|MTMR5_MOUSE	1	1	1	1	4
VALQFPKV	8	Q6NVF4|HELB_MOUSE			1		1
VALVYPKI	8	Q3TPR7|T184C_MOUSE			1		1
VAMVFKTL	8	Q65Z40|WAPL_MOUSE		1			1
VANKIGII	8	P62751|RL23A_MOUSE	1				1
VAPDLGVLL	9	E2JF22|PIEZ1_MOUSE			1		1
VAPDRFPTL	9	Q9DBS8|POC5_MOUSE		1	1	1	3
VAPEEHPVL	9	P60710|ACTB_MOUSE:P63260|ACTG_MOUSE	1				1
VAPFLRQEF	9	Q921N6|DDX27_MOUSE	1	1	1	1	4
VAPGYPLL	8	P21995|EMB_MOUSE	1		1		2
VAPLYKRL	8	Q8BG87|TET3_MOUSE:Q8BG87-4|TET3_MOUSE	1	1	1		3
VAPPFVVV	8	Q9CQ69|QCR8_MOUSE			1		1
VAPQALAV	8	Q61838|PZP_MOUSE	1				1
VAPSFGTL	8	Q6ZQH8|NU188_MOUSE	1				1
VAPSFGTLL	9	Q6ZQH8|NU188_MOUSE	1	1	1	1	4
VAQKFNHL	8	Q80ZE4|MPRA_MOUSE			1		1
VAVTFSERL	9	Q9WTR6|XCT_MOUSE	1	1	1	1	4
VAYCFITI	8	Q8BWQ6|CP062_MOUSE	1				1
VAYEAPSL	8	P99026|PSB4_MOUSE	1				1
VAYEYLCHL	9	Q9JKF1|IQGA1_MOUSE	1				1
VAYGFRNI	8	Q7TMW6|NARFL_MOUSE	1	1	1	1	4
VAYIMDNKL	9	Q6PCN7|HLTF_MOUSE			1		1
VAYKFPEL	8	Q6WKZ8|UBR2_MOUSE	1	1	1	1	4
VAYKFPELL	9	Q6WKZ8-3|UBR2_MOUSE:Q6WKZ8-2|UBR2_MOUSE:Q6WKZ8|UBR2_MOUSE	1	1	1	1	4
VAYLMQKL	8	Q9DBB1|DUS6_MOUSE		1	1	1	3
VAYPHLRI	8	P43024|CX6A1_MOUSE			1		1
VAYRHLVGV	9	Q9D0M3|CY1_MOUSE		1	1		2
VAYRYEVL	8	Q5U4C9|DYRK2_MOUSE			1		1
VAYVFQALI	9	Q80TP3|UBR5_MOUSE		1	1		2
VAYWRQAGL	9	P56382|ATP5E_MOUSE	1	1	1	1	4
VCIRFESL	8	A2AAJ9|OBSCN_MOUSE				1	1
VEYDFHLL	8	P46664|PURA2_MOUSE			1		1
VFIDKQTNL	9	P28659|CELF1_MOUSE			1		1
VFPYYPSL	8	Q2EMV9|PAR14_MOUSE		1			1
VFRLLPQL	8	Q9EST5|AN32B_MOUSE:Q9EST5-2|AN32B_MOUSE	1				1
VFTEVANL	8	Q62141-2|SIN3B_MOUSE:Q62141-3|SIN3B_MOUSE:Q62141-1|SIN3B_MOUSE:Q62141|SIN3B_MOUSE	1				1
VFYAVKVL	8	Q9WVC6|SGK1_MOUSE	1				1
VFYEREVQM	9	Q80SY3|VA0D2_MOUSE	1		1		2
VFYGVFTL	8	P15092|IFI4_MOUSE			1		1
VFYQKKYGI	9	P10107|ANXA1_MOUSE			1		1
VGFDYKERL	9	Q60598|SRC8_MOUSE	1	1		1	3
VGFNVKNV	8	P10126|EF1A1_MOUSE:P62631|EF1A2_MOUSE	1				1
VGFRFPIL	8	Q9QUG9|GRP2_MOUSE	1		1		2
VGFTFPNRL	9	Q9Z0E0|NCDN_MOUSE	1	1	1	1	4
VGINYREV	8	Q01320|TOP2A_MOUSE	1		1		2
VGITYQHI	8	Q9DBZ5|EIF3K_MOUSE	1		1		2
VGLKFLGSL	9	Q61107|GBP4_MOUSE		1		1	2
VGLLYIRL	8	O08523|TECTA_MOUSE		1			1
VGLLYRLL	8	A2AKX3|SETX_MOUSE		1	1		2
VGLRYEKI	8	Q9WUN2|TBK1_MOUSE			1		1
VGLYYINKI	9	Q5RL79|KTAP2_MOUSE		1	1		2
VGPEFKDKL	9	Q9QXS1|PLEC_MOUSE			1		1
VGPFLLTHL	9	Q5SS80|DHR13_MOUSE			1		1
VGPIRKVLL	9	Q8BH60|GOPC_MOUSE			1		1
VGPKFRGV	8	Q9D2V5|AAR2_MOUSE			1		1
VGPRFELKL	9	Q8VHZ7|IMP4_MOUSE			1		1
VGPRYTNL	8	P63085|MK01_MOUSE	1	1	1	1	4
VGPRYTQL	8	Q63844|MK03_MOUSE		1	1	1	3
VGPWLLALF	9	Q9Z1W5|SERP1_MOUSE		1	1		2
VGVKYVNKL	9	Q9WVL3|S12A7_MOUSE			1		1
VGVTYRTL	8	B1AUR6|MMS22_MOUSE	1	1	1		3
VGYNPYSHL	9	O54941|SMCE1_MOUSE			1		1
VGYQFRTSL	9	P21271|MYO5B_MOUSE			1		1
VGYRFVTA	8	Q80TM9|NISCH_MOUSE			1		1
VGYRFVTAI	9	Q80TM9|NISCH_MOUSE	1	1	1	1	4
VGYRVATF	8	Q9D1Q4|DPM3_MOUSE			1		1
VGYRYETL	8	Q9DBT5|AMPD2_MOUSE	1	1	1	1	4
VHIKLPHL	8	Q04447|KCRB_MOUSE		1		1	2
VHIRMAFL	8	Q9DA39|LFG4_MOUSE		1			1
VHYVFDTTI	9	Q9CYQ7|NARF_MOUSE			1		1
VIAAFTSRF	9	Q61165|SL9A1_MOUSE		1	1		2
VIAELVNV	8	Q8K2X8|TF2H5_MOUSE	1				1
VIAGFNRL	8	O70591|PFD2_MOUSE			1		1
VIASFKVL	8	P57780|ACTN4_MOUSE			1		1
VIDTFHTL	8	Q6PR54|RIF1_MOUSE			1		1
VIFDFMDTL	9	Q61151|2A5E_MOUSE		1	1	1	3
VIFGFLNM	8	O09117|SYPL1_MOUSE		1	1		2
VIFIFTKV	8	Q8VCS3|XYLK_MOUSE	1	1	1	1	4
VIFIFTKVF	9	Q8VCS3|XYLK_MOUSE			1		1
VIFRFLQGV	9	Q9WTW5|S22A3_MOUSE			1		1
VIHIFSHI	8	Q99P21|MUTYH_MOUSE		1	1		2
VIHRFLELL	9	Q80YQ2|MED23_MOUSE		1	1		2
VIHSFINAL	9	P97313|PRKDC_MOUSE			1		1
VIIDTFADL	9	P11881|ITPR1_MOUSE			1		1
VIIELIQL	8	Q62388|ATM_MOUSE			1		1
VIISFNSL	8	Q5I012|S38AA_MOUSE	1				1
VILAFDVRI	9	Q05D44|IF2P_MOUSE		1	1		2
VILEYFTRL	9	Q9CR08|RPP29_MOUSE	1	1	1	1	4
VILHFIQL	8	Q9CQ61|UNC50_MOUSE		1	1		2
VILIFHSV	8	Q3U507|GP174_MOUSE			1		1
VILLFQRL	8	Q9D081|ALG14_MOUSE		1			1
VILSFENHV	9	A3KGF7|PLCB2_MOUSE			1		1
VILSFRSL	8	P28660-2|NCKP1_MOUSE:P28660|NCKP1_MOUSE	1	1	1	1	4
VIMKLFPQL	9	Q64FW2|RETST_MOUSE	1	1			2
VINSFVHV	8	Q9D4H8-2|CUL2_MOUSE:Q9D4H8|CUL2_MOUSE	1		1		2
VINVFHHL	8	Q52KE7|CCNL1_MOUSE		1	1		2
VINVFHRL	8	Q9JJA7|CCNL2_MOUSE			1		1
VIQEFQQEL	9	P58929|GMEB2_MOUSE			1		1
VIQVFQQL	8	Q8BHC4|DCAKD_MOUSE	1	1	1	1	4
VIQVHLNGL	9	O88708|ORC4_MOUSE			1		1
VISDFITRL	9	Q9DBG1|CP27A_MOUSE				1	1
VITEFARI	8	Q3TX08|TRM1_MOUSE			1		1
VITKFDHL	8	Q52KB6|C2CD3_MOUSE			1		1
VITKFELTM	9	Q9WUA2|SYFB_MOUSE			1		1
VITNFSARI	9	Q3UVL4|VPS51_MOUSE	1	1	1	1	4
VIVEFRDL	8	Q922X9|ANM7_MOUSE	1	1	1	1	4
VIVFPFSNL	9	Q91ZZ5|RXFP2_MOUSE			1		1
VIVKFAQL	8	Q6NS46|RRP5_MOUSE	1		1		2
VIVLFGARL	9	Q9QXE0|HACL1_MOUSE		1	1		2
VIVPHIVNL	9	Q8BW70|UBP38_MOUSE		1	1		2
VIVRFLTV	8	P62245|RS15A_MOUSE	1	1	1	1	4
VIVRFLTVM	9	P62245|RS15A_MOUSE	1	1	1	1	4
VIVSMYHL	8	Q80TZ3|AUXI_MOUSE			1		1
VIWKYPTM	8	Q9JJ66|CDC20_MOUSE			1		1
VIYDFIEKT	9	Q91YD9|WASL_MOUSE		1			1
VIYEPFQL	8	Q6ZPJ0|TEX2_MOUSE			1		1
VIYEPFQLL	9	Q6ZPJ0|TEX2_MOUSE	1	1	1		3
VIYNPRNL	8	P97481|EPAS1_MOUSE	1				1
VIYPFMQGL	9	Q91VV4-2|DEN2D_MOUSE:Q91VV4|DEN2D_MOUSE	1	1	1	1	4
VIYPMAVV	8	Q8C570|RAE1L_MOUSE	1		1		2
VIYTHPEV	8	O08749|DLDH_MOUSE			1		1
VIYWFRQI	8	Q9CQT9|CT024_MOUSE		1	1		2
VKFLFGGL	8	Q9CR62|M2OM_MOUSE			1		1
VKYLFTGL	8	Q9JMA1|UBP14_MOUSE		1	1	1	3
VLFLFSRL	8	Q9JKJ9|CP39A_MOUSE		1			1
VLIPKLPQL	9	Q9CPZ6|ORML3_MOUSE		1	1	1	3
VLISEFQRL	9	Q3TT38|CF106_MOUSE			1		1
VLPVFDNL	8	P18242|CATD_MOUSE	1				1
VLRSFYEL	8	Q9DA79|DPEP3_MOUSE		1	1	1	3
VLYRYGSF	8	Q60696|PMEL_MOUSE	1	1			2
VLYTYQKL	8	Q91YD6|VILL_MOUSE			1		1
VLYVWAQL	8	Q99J56|DERL1_MOUSE			1	1	2
VMFKKVHGL	9	Q8K021|SCAM1_MOUSE			1		1
VMFTPLTV	8	Q9DCH4|EIF3F_MOUSE			1		1
VMIQHVENL	9	Q60664|LRMP_MOUSE			1		1
VMLETYRNL	9	Q8BZW4|ZN120_MOUSE			1		1
VMVTNVTSL	9	P26039|TLN1_MOUSE		1			1
VMYKFLTV	8	Q9WVC3|CAV2_MOUSE	1	1		1	3
VMYKFLTVF	9	Q9WVC3|CAV2_MOUSE		1		1	2
VMYQVVVI	8	Q9D2Y5|SNX20_MOUSE			1		1
VMYRVIQV	8	Q61069|USF1_MOUSE		1	1		2
VNAFFRLL	8	Q60766|IRGM1_MOUSE		1			1
VNAQFPRF	8	P58742|AAAS_MOUSE		1	1	1	3
VNATYVNV	8	P16056|MET_MOUSE	1	1			2
VNDAFTHV	8	Q8BH57|WDR48_MOUSE			1		1
VNDIFERI	8	Q64478|H2B1H_MOUSE:P10854|H2B1M_MOUSE:Q64475|H2B1B_MOUSE:Q6ZWY9|H2B1C_MOUSE:Q64525|H2B2B_MOUSE:Q8CGP1|H2B1K_MOUSE:P10853|H2B1F_MOUSE:Q8CGP2|H2B1P_MOUSE:Q8CGP2-2|H2B1P_MOUSE	1		1	1	3
VNDIFERIA	9	Q64478|H2B1H_MOUSE:P10854|H2B1M_MOUSE:Q64475|H2B1B_MOUSE:Q6ZWY9|H2B1C_MOUSE:Q64525|H2B2B_MOUSE:Q8CGP1|H2B1K_MOUSE:P10853|H2B1F_MOUSE:Q8CGP2|H2B1P_MOUSE:Q8CGP2-2|H2B1P_MOUSE	1				1
VNFDMTSKF	9	Q9WU78|PDC6I_MOUSE			1		1
VNFEFPEF	8	P62082|RS7_MOUSE	1	1	1	1	4
VNFEKFWEL	9	Q8JZL7|RGF1B_MOUSE	1				1
VNFEVENL	8	Q9JJE7|FADS3_MOUSE				1	1
VNFIKENLL	9	Q61687|ATRX_MOUSE		1	1		2
VNFKHEVSV	9	Q9CQT2|RBM7_MOUSE			1		1
VNFLQTFL	8	Q9CQU5|ZWINT_MOUSE			1		1
VNFLVSLL	8	P53026|RL10A_MOUSE		1	1	1	3
VNFLYMVL	8	Q9D7K2|TEN1L_MOUSE			1		1
VNFPFLVKL	9	P05132-2|KAPCA_MOUSE:P05132|KAPCA_MOUSE	1	1	1	1	4
VNFSPANL	8	Q8BHX1|HAUS1_MOUSE			1		1
VNFTYQFL	8	Q3UMB9|WASC4_MOUSE	1	1	1	1	4
VNFVHTNL	8	Q9D8E6|RL4_MOUSE	1	1	1	1	4
VNIEFKDL	8	Q64343|ABCG1_MOUSE	1		1		2
VNIKLNQL	8	Q9DBC3|MTR1_MOUSE			1		1
VNILYPVI	8	Q9D2C9|SNPC3_MOUSE			1		1
VNIPFVRL	8	Q8R151|ZNFX1_MOUSE		1	1		2
VNIQYLDL	8	Q8R0G9|NU133_MOUSE			1		1
VNIRFIGGL	9	P39098|MA1A2_MOUSE		1	1	1	3
VNIRLVEL	8	Q9ERU9|RBP2_MOUSE			1		1
VNIVINNL	8	Q80TY5|VP13B_MOUSE			1		1
VNKNYLYL	8	Q62393|TPD52_MOUSE		1	1	1	3
VNKSYPSL	8	O08810|U5S1_MOUSE			1		1
VNLAYENV	8	Q9JHU4|DYHC1_MOUSE	1				1
VNLEFLSL	8	Q9EST5|AN32B_MOUSE		1	1	1	3
VNLKKKSYL	9	Q9D753|EXOS8_MOUSE			1		1
VNLQYSEV	8	P62700|YPEL5_MOUSE	1				1
VNLREYPSL	9	Q8BVK9|SP110_MOUSE	1		1		2
VNMEKYPDL	9	Q99388|CSPRS_MOUSE:O35892-2|SP100_MOUSE:O35892|SP100_MOUSE	1		1		2
VNNIFQLTV	9	Q9JKY5|HIP1R_MOUSE			1		1
VNQERFPNV	9	Q9JHJ0|TMOD3_MOUSE			1		1
VNQFFKTM	8	Q8C3J5|DOCK2_MOUSE			1		1
VNQFFKTML	9	Q8C3J5|DOCK2_MOUSE			1		1
VNQKFNNL	8	Q8K4R9|DLGP5_MOUSE	1	1	1		3
VNQKFNNLI	9	Q8K4R9|DLGP5_MOUSE			1		1
VNRKFGNRI	9	Q8BGQ4|POMT2_MOUSE			1		1
VNRVFDKL	8	P28076|PSB9_MOUSE	1	1	1		3
VNSIFQHL	8	Q80SU7|GVIN1_MOUSE	1				1
VNTFFSFL	8	O35685|NUDC_MOUSE		1	1		2
VNVAKLRYM	9	Q9CQS5|RIOK2_MOUSE			1		1
VNVCYKEL	8	Q8BKT7|THOC5_MOUSE	1				1
VNVDHPINL	9	Q3UIW5|RNF10_MOUSE		1	1	1	3
VNVDYSKL	8	Q62425|NDUA4_MOUSE	1	1	1	1	4
VNVEFQGL	8	Q8CJ19|MICA3_MOUSE		1			1
VNVERVLNV	9	Q6DFV5|HELZ_MOUSE	1		1	1	3
VNVPFHLAL	9	Q8BMG7|RBGPR_MOUSE		1	1	1	3
VNVPLYVNL	9	Q05A80|CAPR2_MOUSE			1		1
VNVQIPLL	8	Q9CXJ4|ABCB8_MOUSE			1		1
VNVQKISNL	9	Q8CFI7|RPB2_MOUSE			1		1
VNVQKLLAL	9	Q9Z1S3|GRP1_MOUSE			1		1
VNVRFSTI	8	P28563|DUS1_MOUSE	1	1	1	1	4
VNVRFSTIV	9	P28563|DUS1_MOUSE				1	1
VNVRFTGV	8	Q76LS9-3|MINY1_MOUSE:Q6PDI6-2|MINY2_MOUSE:Q6PDI6-3|MINY2_MOUSE:Q76LS9-2|MINY1_MOUSE:Q76LS9|MINY1_MOUSE:Q6PDI6|MINY2_MOUSE	1				1
VNVVFIGHV	9	Q8R050|ERF3A_MOUSE		1	1		2
VNWDFVEQV	9	Q3UIW5|RNF10_MOUSE		1	1	1	3
VNYDFGHM	8	P58283|RN216_MOUSE		1	1		2
VNYDFVSF	8	Q5SUV5|MYLK4_MOUSE			1		1
VNYDVRVF	8	Q8R0G9|NU133_MOUSE			1		1
VNYDYSTLI	9	D2EAC2|ZBED6_MOUSE		1			1
VNYEFGIAL	9	Q8BHN7|CL029_MOUSE		1	1	1	3
VNYEPLGL	8	Q80YE7|DAPK1_MOUSE			1		1
VNYPFIDM	8	P70459|ERF_MOUSE		1		1	2
VNYRHLAL	8	P08775|RPB1_MOUSE	1	1	1		3
VNYRHLALL	9	P08775|RPB1_MOUSE	1	1	1		3
VNYRVPNM	8	Q62077|PLCG1_MOUSE	1	1			2
VNYSFRVM	8	Q810U4|NRCAM_MOUSE		1			1
VNYYFERNM	9	Q9D4H9|PHF14_MOUSE		1	1		2
VPYPFGNL	8	P15533|TR30A_MOUSE			1		1
VQLAIFANM	9	Q99LX8|OST4_MOUSE			1		1
VQMKFRLL	8	P24860|CCNB1_MOUSE			1		1
VQPHYPYL	8	Q8BGY6|B3GN5_MOUSE		1	1		2
VQVLFPLF	8	Q9ESE1|LRBA_MOUSE			1		1
VQYAFGLPF	9	O08710|THYG_MOUSE			1		1
VQYEMRTL	8	Q80ZK0|RT10_MOUSE			1		1
VQYKFSHL	8	Q9JHD1|KAT2B_MOUSE:Q9JHD2|KAT2A_MOUSE	1	1	1	1	4
VQYLYRVF	8	Q80Y44|DDX10_MOUSE		1	1		2
VQYTFDLQL	9	P56581|TDG_MOUSE		1	1	1	3
VQYVLPRL	8	Q62245|SOS1_MOUSE		1	1	1	3
VRFKHRYL	8	Q9DB28|POP5_MOUSE			1		1
VRFVFTLV	8	Q8BU33|ILVBL_MOUSE		1			1
VRVPYFIDL	9	Q99LR1|ABD12_MOUSE		1			1
VRYIHVEL	8	Q4U2R1|HERC2_MOUSE			1		1
VRYINENL	8	P11983|TCPA_MOUSE	1				1
VRYSHEKL	8	Q8BGQ7|SYAC_MOUSE	1	1	1		3
VRYVLPRL	8	Q02384|SOS2_MOUSE		1	1		2
VSAGIQTSF	9	Q61656|DDX5_MOUSE	1				1
VSALFRENL	9	Q5SX40|MYH1_MOUSE			1		1
VSDAFQKL	8	Q9CQK3|RDM1_MOUSE			1		1
VSFDYHQM	8	Q8CHC4|SYNJ1_MOUSE			1		1
VSFFFQNI	8	Q6PFE3|RA54B_MOUSE		1	1	1	3
VSFIRTIQM	9	Q99104|MYO5A_MOUSE		1	1		2
VSFLHTVLL	9	Q61687|ATRX_MOUSE		1	1		2
VSFLLPKL	8	Q8BUI3|LRWD1_MOUSE			1		1
VSFPFGKI	8	Q6NS46|RRP5_MOUSE			1		1
VSFTYRYL	8	Q920Q4|VPS16_MOUSE	1	1	1	1	4
VSFWFGTRF	9	Q99J56|DERL1_MOUSE		1	1		2
VSGTVYIHL	9	O35912|EMP3_MOUSE			1		1
VSHIFETRV	9	Q5SSW2|PSME4_MOUSE			1		1
VSIEHQELM	9	Q80SU7|GVIN1_MOUSE	1				1
VSIQFYHL	8	Q5H8C4|VP13A_MOUSE	1	1	1		3
VSLLFDHL	8	Q9Z1S3|GRP1_MOUSE			1		1
VSLRVIND	8	Q60696|PMEL_MOUSE	1				1
VSLSFCML	8	Q80UK8|INT2_MOUSE			1		1
VSPALIARF	9	Q6ZQ38|CAND1_MOUSE			1		1
VSPEHLEQL	9	Q8CC12|CDAN1_MOUSE			1		1
VSPIILRL	8	P05555|ITAM_MOUSE			1		1
VSPLFQKL	8	Q68FL6|SYMC_MOUSE	1		1		2
VSPRLTFL	8	P36371|TAP2_MOUSE			1		1
VSPSYSHM	8	P85442|VGLL3_MOUSE		1			1
VSPYFVAL	8	P23475|XRCC6_MOUSE			1		1
VSQYYPKL	8	Q3TEA8-3|HP1B3_MOUSE:Q3TEA8-2|HP1B3_MOUSE:Q3TEA8|HP1B3_MOUSE	1	1	1	1	4
VSTKFEHL	8	B2RXC1|TPC11_MOUSE		1	1		2
VSTRFIKL	8	P97798|NEO1_MOUSE			1		1
VSVEYTEKM	9	O35130|NEP1_MOUSE	1	1	1		3
VSVKYPRL	8	Q80Y98|DDHD2_MOUSE			1		1
VSVLHALL	8	Q91V83|TTI1_MOUSE			1		1
VSVLVALL	8	P04441-2|HG2A_MOUSE:P04441|HG2A_MOUSE	1				1
VSVSFRVL	8	Q8BG28|B3GL2_MOUSE		1			1
VSWLYLSRL	9	Q9CQS5|RIOK2_MOUSE			1		1
VSYEKFSNL	9	Q5SVR0|TBC9B_MOUSE		1	1	1	3
VSYKYSKV	8	Q07113|MPRI_MOUSE			1		1
VSYLFSHV	8	Q9CS42|PRPS2_MOUSE:Q9D7G0|PRPS1_MOUSE	1	1	1		3
VSYPHLVLL	9	Q62137|JAK3_MOUSE			1		1
VSYQFPKL	8	Q924W7-3|ST5_MOUSE:Q924W7-2|ST5_MOUSE:Q924W7|ST5_MOUSE	1	1	1	1	4
VSYQHAFL	8	Q9WV70|NOC2L_MOUSE		1	1		2
VSYSFLEI	8	Q91VU1|YIPF1_MOUSE	1				1
VSYWFDQRF	9	P54751|SIA4A_MOUSE	1	1	1		3
VTFDYEEL	8	Q9D2L9|F111A_MOUSE			1		1
VTFIYQKL	8	Q8C963|CC159_MOUSE		1	1	1	3
VTFSFKQL	8	Q69ZK0-2|PREX1_MOUSE:Q69ZK0|PREX1_MOUSE	1		1		2
VTIHYNKL	8	Q62083|PICK1_MOUSE			1		1
VTITFKNM	8	Q8R4Y4|STAB1_MOUSE	1				1
VTLKFLEL	8	Q6PFD5|DLGP3_MOUSE			1		1
VTLSFGGRL	9	Q9WV32|ARC1B_MOUSE			1		1
VTLVFEHI	8	P30285|CDK4_MOUSE			1		1
VTNRFDQLF	9	Q9CY58|PAIRB_MOUSE		1	1	1	3
VTPEGYAHL	9	Q9Z2V5|HDAC6_MOUSE			1		1
VTPRFPKL	8	E9PZJ8|ASCC3_MOUSE		1	1		2
VTVDFSKL	8	Q6NVF4|HELB_MOUSE		1	1		2
VTVVFERM	8	Q80TL7|MON2_MOUSE			1		1
VTWKYTAL	8	Q7TSQ8|PDPR_MOUSE			1		1
VTWRVTNL	8	P10404|ENV1_MOUSE				1	1
VTYHGFPNL	9	O08760|OGG1_MOUSE		1	1	1	3
VTYLFKQL	8	Q9EPK7|XPO7_MOUSE		1	1		2
VTYLFVQL	8	Q9CQG6|TM147_MOUSE		1			1
VTYPQPRL	8	Q8K1E6|ALKB3_MOUSE			1		1
VTYSFRQSF	9	Q8R0S2|IQEC1_MOUSE:Q8R0S2-2|IQEC1_MOUSE:Q5DU25|IQEC2_MOUSE	1	1		1	3
VTYSKPRL	8	Q9CPQ8|ATP5L_MOUSE			1		1
VTYVYQLI	8	Q9QZ88|VPS29_MOUSE		1	1		2
VVAEFGRI	8	Q8BXC6|COMD2_MOUSE	1				1
VVARFLSL	8	Q8R3C0|MCMBP_MOUSE			1		1
VVDIFRKL	8	P51791|CLCN3_MOUSE		1			1
VVFFFKTL	8	Q9JLJ1|SELK_MOUSE	1	1	1	1	4
VVFFFKTLL	9	Q9JLJ1|SELK_MOUSE	1	1	1		3
VVFFFTRL	8	P50615|BTG3_MOUSE	1	1		1	3
VVFQFQHI	8	P70658-2|CXCR4_MOUSE:P70658|CXCR4_MOUSE	1		1		2
VVFYFTHL	8	Q9D8H7|OMA1_MOUSE		1	1		2
VVIDLIRL	8	Q8BG67|EFR3A_MOUSE			1		1
VVYDYQRLL	9	P21841|PSPC_MOUSE		1			1
VVYIYHSL	8	Q8CD15|RIOX2_MOUSE	1	1	1		3
VVYIYKEHF	9	Q5XG71|UTP20_MOUSE		1	1	1	3
VVYPFPTF	8	Q6PFH3|DCA15_MOUSE:Q6PFH3-2|DCA15_MOUSE	1	1	1	1	4
VVYPWTQRY	9	P02088|HBB1_MOUSE			1		1
VVYRFFSRL	9	Q9CQU3|RER1_MOUSE		1	1	1	3
VVYRYLYV	8	Q8R3L5|SO3A1_MOUSE			1		1
VVYSYHYL	8	O08811|ERCC2_MOUSE			1		1
VVYTPWSNL	9	Q78PG9|CCD25_MOUSE		1	1		2
VVYYNKGL	8	Q91V61|SFXN3_MOUSE			1		1
VWIKPSGL	8	Q8R3P6|VWA9_MOUSE			1		1
VWINAHGL	8	Q571I9|A16A1_MOUSE			1		1
VWLEAARL	8	Q91YR7|PRP6_MOUSE	1	1	1	1	4
VWTHYYSV	8	P07147|TYRP1_MOUSE		1			1
VWTLRDFSL	9	Q01514|GBP1_MOUSE		1			1
VWYRVIQI	8	P17427|AP2A2_MOUSE		1	1		2
VWYWRRITM	9	Q6DID7|WLS_MOUSE		1			1
VYIEHRLM	8	Q61881|MCM7_MOUSE			1		1
WNYRFANL	8	Q8VCU0|ANGE1_MOUSE		1	1		2
YAMIYRNL	8	P23804|MDM2_MOUSE			1	1	2
YAPEFQFL	8	Q8BGZ2|F168A_MOUSE			1		1
YAYSFKYL	8	Q62383|SPT6H_MOUSE		1	1		2
YEYLFTNL	8	Q8K4J0|DCR1C_MOUSE			1		1
YGVLFRNL	8	Q61451|CD53_MOUSE			1		1
YGYHFPEL	8	Q9D6Z1|NOP56_MOUSE		1	1	1	3
YHYIFTTL	8	P39087|GRIK2_MOUSE		1			1
YIYKFLTL	8	Q24JP3|F178B_MOUSE		1			1
YNFQYISL	8	Q8K2C8|GPAT4_MOUSE		1	1	1	3
YNWRYKNL	8	Q8CFQ3|AQR_MOUSE			1		1
YQYLYYHL	8	Q7TN75|PEG10_MOUSE		1			1
YQYSFPEL	8	Q5M8N4|D39U1_MOUSE			1	1	2
YSLQFTNL	8	Q60595|XL3A_MOUSE		1	1	1	3
YSLVYQAL	8	Q8BSP2|CNDH2_MOUSE			1		1
YSPFFRNNL	9	Q8BJ05|ZC3HE_MOUSE			1		1
YSPPFFSL	8	Q8BXQ8|FA53C_MOUSE			1		1
YSYSFFHL	8	Q9QZI9|SERC3_MOUSE		1	1		2
YTFSFAKL	8	Q0VG85|CC162_MOUSE			1		1
YTFVYRVL	8	Q62136|PTN21_MOUSE		1		1	2
YTYQFPEF	8	Q61474|MSI1H_MOUSE			1		1
YVLHFTAL	8	Q9JJ80|RPF2_MOUSE		1	1		2
YVYEYLLHV	9	Q9CYZ8|SSBP2_MOUSE		1	1		2
1, Identified in this Study
2, Previously Published Peptide (17)
